# Supplementary material for: Synthesis of phosphate stabilised iodanes and their application in intramolecular aryl migrations
Source: Royal Society of Chemistry journal article supplement (doi:10.1039/d4cc04934a), 2024-01-01
Supplement: d4cc04934a1.pdf [file d4cc04934a1.pdf]

## Supporting Information

for

# Synthesis of Phosphate Stabilized Iodanes and their Application in Intramolecular Aryl Migrations

Jan Rick Koch<sup>1</sup>, Mattis Damrath<sup>1</sup>, Pim Puylaert<sup>2</sup>, Boris J. Nachtsheim<sup>1</sup>

Address: <sup>1</sup>Institute for Organic and Analytical Chemistry, University of Bremen, Leobener  
Straße 7, 28359 Bremen, Germany and <sup>2</sup>Institute for Inorganic Chemistry and  
Crystallography, University of Bremen, Leobener Straße 7, 28359 Bremen, Germany

E-Mail: [nachtsheim@uni-bremen.de](mailto:nachtsheim@uni-bremen.de)

## Table of Contents

|      |                                                                          |    |
|------|--------------------------------------------------------------------------|----|
| 1.   | General Information .....                                                | 1  |
| 3.   | General Procedures and Literature known Starting Materials .....         | 4  |
| 3.1. | 2-Iodo phenols and trimethylsilyl arenes .....                           | 4  |
| 3.2. | General Procedure for Phosphorylation of Phenols (GP1) .....             | 4  |
| 3.3. | General Procedure for Oxidation into cyclic Hydroxy-Iodanes (GP2) .....  | 4  |
| 3.4. | General Procedure for Arylation of 7 into 9 in MeCN/TFA (GP3) .....      | 5  |
| 3.5. | General Procedure for Arylation of 7 into 9 in TFE (GP4) .....           | 5  |
| 3.6. | General Procedure for Aryl Migration into Iodo-Diaryl Ethers (GP6) ..... | 6  |
| 4.   | Experimental Data .....                                                  | 7  |
| 4.1. | Synthesis of 2-Iodoaryl dihydrogen phosphates .....                      | 7  |
| 4.4. | Syntheses of Diaryl Ethers .....                                         | 22 |
| 5.   | References .....                                                         | 28 |
| 6.   | NMR-Spectra .....                                                        | 29 |
| 7.   | Crystallographic Data .....                                              | 85 |
| 7.1  | Crystallographic Data from Compound <b>7a</b> .....                      | 85 |
| 7.2  | Crystallographic Data from Compound <b>9a</b> .....                      | 88 |

## 1. General Information

All chemicals were purchased from commercial suppliers and used as received. Unless otherwise noted, all reactions were carried out under air. Reactions with chemicals sensitive to moisture or oxygen were carried out under an argon atmosphere using standard Schlenk techniques. Anhydrous diethyl ether (Et<sub>2</sub>O) was obtained from an Inert PS-MD-6 solvent purification system. All other solvents were dried using standard methods if necessary.<sup>1</sup>

Thin layer chromatography was performed on fluorescence indicator marked precoated silica gel 60 plates (Macherey-Nagel, POLYGRAM SIL G/UV254) and visualized by UV light (254 nm). Flash column chromatography was performed on silica gel (40 – 63 μm) with the solvents given in the procedures.

NMR spectra were recorded on a Bruker AVANCE NEO 600 MHz spectrometer with BBO probe head and a Bruker AVANCE NEO 600 MHz spectrometer with TXI probe head at 25 °C. Chemical shifts for <sup>1</sup>H-NMR spectra are reported as δ (parts per million) relative to the residual proton signal of CDCl<sub>3</sub> at 7.26 ppm (s), DMSO-d<sub>6</sub> at 2.50 ppm (quint) or MeOH-d<sub>4</sub> at 3.31 ppm (quint). Chemical shifts for <sup>13</sup>C-NMR spectra are reported as δ (parts per million) relative to the signal of CDCl<sub>3</sub> at 77.0 ppm (t), DMSO-d<sub>6</sub> at 39.5 ppm (sept) or MeOH-d<sub>4</sub> at 49.0 ppm (sept). Chemical shifts for <sup>19</sup>F-NMR spectra are reported as δ (parts per million) relative to the signal of Si(CH<sub>3</sub>)<sub>4</sub> at 0.0 ppm. The following abbreviations are used to describe splitting patterns: br = broad, s = singlet, d = doublet, t = triplet, q = quartet, quint = quintet, sept = septet, m = multiplet. Coupling constants J are given in Hz.

ESI and APCI mass spectra were recorded on an Advion Expression CMSL via ASAP probe or direct inlet. Low resolution EI mass spectra were recorded on an Agilent 5977A Series GC/MSD system. High resolution (HR) EI mass spectra were recorded on a double focusing mass spectrometer ThermoQuest MAT 95 XL from Finnigan MAT. HR-ESI mass spectra were recorded on a Bruker Impact II. All Signals are reported with the quotient from mass to charge *m/z*.

IR spectra were recorded on a Thermo Scientific Nicolet iS10 spectrometer with a diamond ATR unit. The absorption bands are reported in cm<sup>-1</sup>.

Melting points of solids were measured on a Büchi M-5600 Melting Point apparatus and are uncorrected. The measurements were performed with a heating rate of 2 °C/min and the melting point temperatures T are reported in °C.

Reactions that required heating were either heated using an oil bath, if the reaction was performed in a flask or in a heating block, if the reaction was performed in a screw cap vial.

Single crystals were grown from MeOH-solutions by slow Et<sub>2</sub>O diffusion. Intensity data of suitable single crystals were collected on a Bruker D8 Venture CMOS diffractometer at 100 K with Mo-K $\alpha$  (0.71073 Å) radiation. All structures were solved by direct methods and refined based on F<sup>2</sup> by use of the SHELX program package as implemented in Olex 2.2. All non-hydrogen atoms were refined using anisotropic displacement parameters. Hydrogen atoms attached to carbon atoms were included in geometrically calculated positions using a rigid model. Figures were created using Diamond 4.0. Crystallographic data for the structural analyses have been deposited with the Cambridge Crystallographic Data Centre. Copies of this information may be obtained free of charge from The Director, CCDC, 12 Union Road, Cambridge CB2 1EZ, UK (Fax: +44-1223-336033; e-mail: [deposit@ccdc.cam.ac.uk](mailto:deposit@ccdc.cam.ac.uk) or <http://www.ccdc.cam.ac.uk>)

## 2. Optimisation of Reaction Conditions

Table 1: Optimization of the aryl migration from **9a** to **10a** in an aqueous medium.

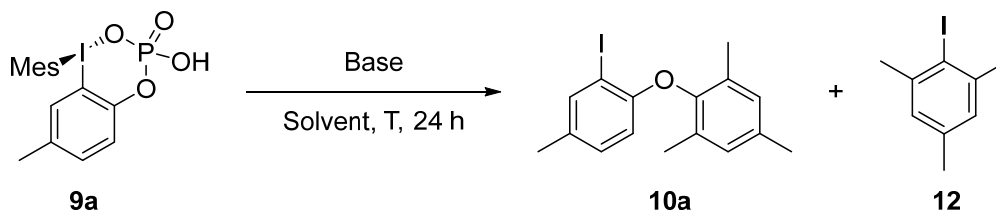

| Entry <sup>[a]</sup> | Base                               | eq.         | Solvent               | T (°C)    | Yield <b>10a</b>   | Yield <b>12</b> |
|----------------------|------------------------------------|-------------|-----------------------|-----------|--------------------|-----------------|
| 1                    | Cs <sub>2</sub> CO <sub>3</sub>    | 1.10        | MeCN                  | 80        | 98% <sup>[b]</sup> | -               |
| 2                    | Cs <sub>2</sub> CO <sub>3</sub>    | 1.10        | <b>H<sub>2</sub>O</b> | 80        | 45% <sup>[b]</sup> | 54%             |
| 3                    | <b>CsOH</b>                        | 1.10        | H <sub>2</sub> O      | 80        | 5%                 | 75%             |
| 4                    | <b>NaOH</b>                        | 1.10        | H <sub>2</sub> O      | 80        | 4%                 | 73%             |
| 5                    | <b>NaOAc</b>                       | 1.10        | H <sub>2</sub> O      | 80        | 7%                 | 77%             |
| 6                    | <b>K<sub>3</sub>PO<sub>4</sub></b> | 1.10        | H <sub>2</sub> O      | 80        | 21%                | 7%              |
| 7                    | <b>Ca(OH)<sub>2</sub></b>          | 1.10        | H <sub>2</sub> O      | 80        | 72%                | -               |
| 8                    | Ca(OH) <sub>2</sub>                | <b>2.00</b> | H <sub>2</sub> O      | 80        | 83%                | -               |
| 9                    | Ca(OH) <sub>2</sub>                | 2.00        | H <sub>2</sub> O      | <b>40</b> | 84%                | -               |
| 10                   | Ca(OH) <sub>2</sub>                | 2.00        | H <sub>2</sub> O      | <b>rt</b> | 12%                | -               |
| 11                   | <b>Mg(OH)<sub>2</sub></b>          | 2.00        | H <sub>2</sub> O      | 40        | 1%                 | 2%              |
| 12                   | <b>Ba(OH)<sub>2</sub></b>          | 2.00        | H <sub>2</sub> O      | 40        | 3%                 | 4%              |
| 13                   | <b>no base</b>                     | -           | H <sub>2</sub> O      | 80        | traces             | -               |

<sup>[a]</sup> General reaction conditions: **9a** (50.0 μmol), solvent (0.05 M), addition of base, stirring at the given temperature for 24 h, yield was determined via <sup>1</sup>H NMR using dinitrobenzene as an internal standard. <sup>[b]</sup> isolated yield.

### 3. General Procedures and Literature known Starting Materials

#### 3.1. 2-Iodo phenols and trimethylsilyl arenes

Except of 2-iodophenol all iodinated phenols were prepared as mentioned in the literature.<sup>2</sup> Furthermore trimethyl(*p*-tolyl)silane <sup>3</sup>, (4-(*tert*-butyl)phenyl)triethylsilane <sup>3</sup>, trimethyl(4-chlorophenyl)silane <sup>4</sup>, trimethyl(4-fluorophenyl)silane <sup>5</sup>, trimethyl(naphthalen-1-yl)silane <sup>3</sup> and trimethyl(4-(trifluoromethyl)phenyl)silane <sup>6</sup> were synthesised according to literature.

#### 3.2. General Procedure for Phosphorylation of Phenols (GP1)

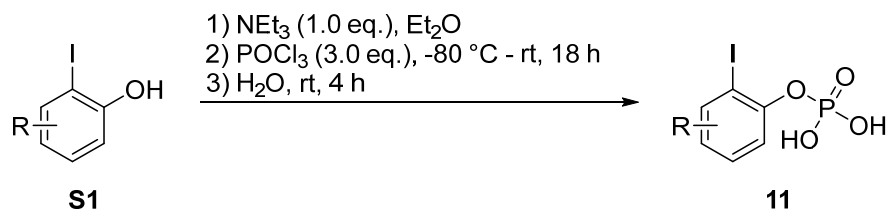

*Scheme 1: General Scheme for the Phosphorylation of 2-iodo phenols into 7.*

To a solution of POCl<sub>3</sub> (3.00 eq.) in Et<sub>2</sub>O (0.6 M) was added a solution of the phenol derivative (1.00 eq.) and NEt<sub>3</sub> (1.00 eq.) in Et<sub>2</sub>O (0.2 M) at -80 °C over a period of 30 min. The resulting mixture was slowly warmed to rt and stirred for 18 h. After complete conversion (<sup>1</sup>H-NMR in CDCl<sub>3</sub>), water (10 mL/mmol) was added, and the solution was stirred for further 4 h. The resulting phases were separated, and the aqueous phase was extracted with Et<sub>2</sub>O (5 x 20 mL/mmol). The combined organic phases were dried over Na<sub>2</sub>SO<sub>4</sub>, filtrated, and concentrated under reduced pressure. The residue was triturated several times with *n*-pentane (5 mL/mmol) until the product **11** was solidified.

#### 3.3. General Procedure for Oxidation into cyclic Hydroxy-Iodanes (GP2)

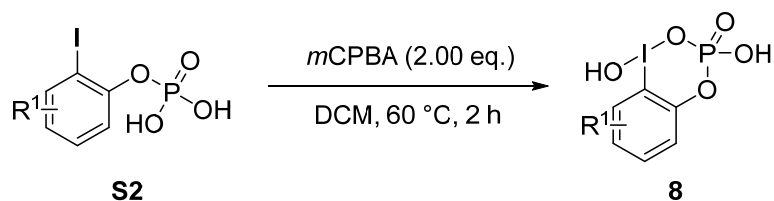

*Scheme 2: General Scheme for the oxidation of phosphate derivatives (11) into hydroxy iodanes (8).*

To a suspension of **11** (1.00 eq.) in DCM (0.2 M) was added *m*CPBA (70%, 2.00 eq.) and the mixture was stirred at 60 °C for 2 h. After complete consumption of the starting material the

mixture was concentrated under reduced pressure and suspended in Et<sub>2</sub>O (5 mL/mmol). The precipitate was washed with Et<sub>2</sub>O (2 x 5 mL/mmol) and dried *in vacuo* to obtain **8**.

### 3.4. General Procedure for Arylation of **8** into **9** in MeCN/TFA (GP3)

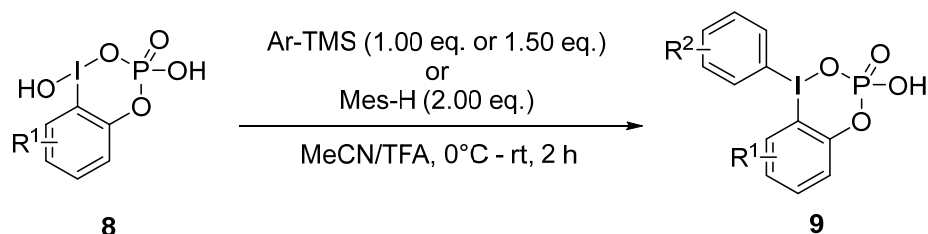

*Scheme 3: General Scheme for the arylation of **8** with less electron-rich aromatic systems.*

To an ice-cooled solution of **8** (1.00 eq.) in MeCN/TFA (1:1, 0.1 M) was slowly added Ar-TMS (1.00 eq. or 1.50 eq.) or mesitylene (2.00 eq.) and the solution was stirred at rt for 2 h. The solvent was removed under reduced pressure, the residue was suspended in Et<sub>2</sub>O (10 mL/mmol), and the resulting precipitate was washed with Et<sub>2</sub>O (2 x 10 mL/mmol). Afterwards the solid was repeatedly suspended in water (5 mL/mmol), which was then removed by lyophilization, until the TFA was completely removed, to obtain phosphate-stabilised diaryliodanes **9**.

### 3.5. General Procedure for Arylation of **8** into **9** in TFE (GP4)

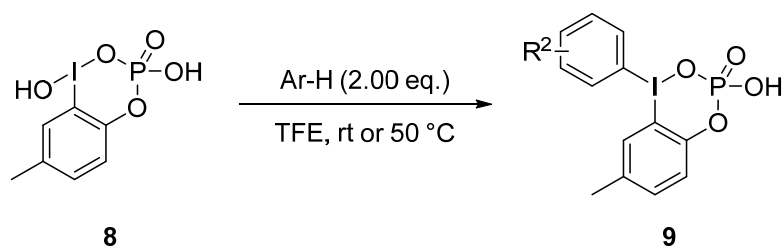

*Scheme 4: General Scheme for the arylation of **8** with electron-rich aromatic systems.*

To a solution of **8** (1.00 eq) in TFE (0.1 M) was added the electron rich arene (2.00 eq.) and the mixture was stirred at rt or 50 °C. After complete conversion, the solvent was removed under reduced pressure and the residue was suspended in Et<sub>2</sub>O (10 mL/mmol). The precipitate was washed with Et<sub>2</sub>O (2 x 10 mL/mmol) and dried *in vacuo* to obtain **9**.

*Note: Due to the low solubility of some substrates in DMSO-d<sub>6</sub> the NMR-sample was mixed with a few drops of TFA to obtain a complete solution.*

### 3.6. General Procedure for Aryl Migration into Iodo-Diaryl Ethers (GP6)

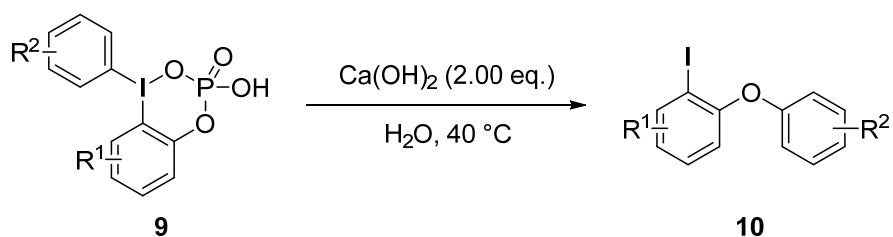

*Scheme 5: General Scheme for the aryl migration of **9** into diaryl ethers **10**.*

To a suspension of **9** (100  $\mu\text{mol}$ , 1.00 eq.) in water (0.05 M, 2 mL) was added  $\text{Ca(OH)}_2$  (200  $\mu\text{mol}$ , 14.8 mg, 2.00 eq.) and the mixture was stirred at 40  $^\circ\text{C}$ . After complete conversion, EtOAc (10 mL) was added, the phases were separated, and the aqueous phase was extracted with EtOAc (3 x 10 mL). The combined organic phases were dried over  $\text{Na}_2\text{SO}_4$ , filtrated, and concentrated under reduced pressure. The residue was purified by flash column chromatography to obtain diaryl ethers **10**.



## 4. Experimental Data

### 4.1. Synthesis of 2-Iodoaryl dihydrogen phosphates

#### 2-Iodo-4-methylphenyl dihydrogen phosphate (**11a**)

Following GP1, the reaction of 2-iodo-4-methylphenol (2.34 g, 10.0 mmol) with  $\text{NEt}_3$  (1.39 mL, 10.0 mmol) in  $\text{Et}_2\text{O}$  (50 mL) and  $\text{POCl}_3$  (2.80 mL, 30.0 mmol) in  $\text{Et}_2\text{O}$  (50 mL) gave the product **11a** (3.09 g, 9.84 mmol, 98%) as an off-white solid.

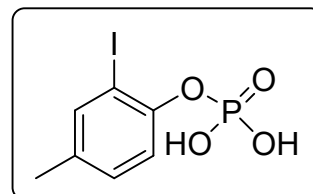

$^1\text{H}$  NMR (601 MHz,  $\text{DMSO}-d_6$ )  $\delta$  7.66 – 7.60 (m, 1H), 7.25 (dd,  $J = 8.3, 1.1$  Hz, 1H), 7.15 (dd,  $J = 8.8, 2.0$  Hz, 1H), 2.23 (s, 3H).  $^{13}\text{C}$  NMR (151 MHz,  $\text{DMSO}-d_6$ )  $\delta$  149.5 (d,  $J = 5.4$  Hz), 139.3, 135.0, 129.9, 119.5 (d,  $J = 2.5$  Hz), 89.5 (d,  $J = 8.5$  Hz), 19.6. HRMS(ESI):  $m/z$   $[\text{M}-\text{H}]^-$  calculated for  $\text{C}_7\text{H}_7\text{IO}_4\text{P}^-$ : 312.9132; found 312.9124. IR (ATR)  $\tilde{\nu} = 2921, 2849, 2360, 1480, 1223, 1094, 989$ .  $\text{Mp} = 134\text{-}136$  °C.

*Note: The two protons of the phosphoric acid cannot be integrated in the  $^1\text{H}$ -NMR which led to a widening and shift of the water-signal. This is also present in the following spectra of **S2**.*

#### 2-Iodophenyl dihydrogen phosphate (**11b**)

Following GP1, the reaction of 2-iodophenol (2.20 g, 10.0 mmol) with  $\text{NEt}_3$  (1.39 mL, 10.0 mmol) in  $\text{Et}_2\text{O}$  (50 mL) and  $\text{POCl}_3$  (2.80 mL, 30.0 mmol) in  $\text{Et}_2\text{O}$  (50 mL) gave the product **11b** (2.86 g, 9.55 mmol, 95%) as an off-white solid.

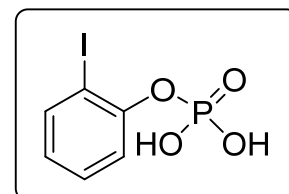

$^1\text{H}$  NMR (601 MHz,  $\text{DMSO}-d_6$ )  $\delta$  7.82 (d,  $J = 7.9$  Hz, 1H), 7.41 – 7.33 (m, 2H), 6.90 (td,  $J = 7.4, 1.7$  Hz, 1H).  $^{13}\text{C}$  NMR (151 MHz,  $\text{DMSO}-d_6$ )  $\delta$  151.6 (d,  $J = 5.1$  Hz), 139.3, 129.5, 125.7, 119.9 (d,  $J = 2.5$  Hz), 89.8 (d,  $J = 8.7$  Hz). HRMS(ESI):  $m/z$   $[\text{M}-\text{H}]^-$  calculated for  $\text{C}_6\text{H}_5\text{IO}_4\text{P}^-$ : 298.8976; found 298.8970. IR (ATR)  $\tilde{\nu} = 2916, 2849, 2359, 2331, 1458, 1216, 1021, 976$ .  $\text{Mp} = 114\text{-}116$  °C.

#### 4-(*Tert*-butyl)-2-iodophenyl dihydrogen phosphate (**11c**)

Following GP1, the reaction of 4-(*tert*-butyl)-2-iodophenol (828 mg, 3.00 mmol) with NEt<sub>3</sub> (418 μL, 3.00 mmol) in Et<sub>2</sub>O (15 mL) and POCl<sub>3</sub> (841 μL, 9.00 mmol) in Et<sub>2</sub>O (15 mL) gave the product **11c** (987 mg, 2.77 mmol, 92%) as a pink solid.

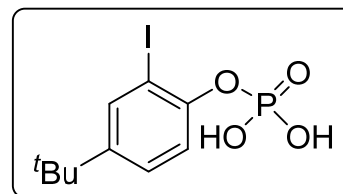

<sup>1</sup>H NMR (600 MHz, DMSO-*d*<sub>6</sub>) δ 7.74 (s, 1H), 7.39 (d, *J* = 8.0 Hz, 1H), 7.30 (d, *J* = 8.5 Hz, 1H), 1.25 (s, 9H). <sup>13</sup>C NMR (151 MHz, DMSO-*d*<sub>6</sub>) δ 149.4 (d, *J* = 5.3 Hz), 148.2, 135.7, 126.5, 119.3 (d, *J* = 2.5 Hz), 89.6 (d, *J* = 8.4 Hz), 33.9, 31.1. HRMS(ESI): *m/z* [M-H]<sup>-</sup> calculated for C<sub>10</sub>H<sub>13</sub>I<sub>2</sub>O<sub>4</sub>P: 354.9602; found 354.9589. IR (ATR)  $\tilde{\nu}$  = 2955, 2901, 2864, 2324, 1491, 1478, 1227, 1026, 974. Mp = 150-152 °C.

#### 3-Iodo-[1,1'-biphenyl]-4-yl dihydrogen phosphate (**11d**)

Following GP1, the reaction of 3-iodo-[1,1'-biphenyl]-4-ol (888 mg, 3.00 mmol) with NEt<sub>3</sub> (418 μL, 3.00 mmol) in Et<sub>2</sub>O (15 mL) and POCl<sub>3</sub> (841 μL, 9.00 mmol) in Et<sub>2</sub>O (15 mL) gave the product **11d** (758 mg, 2.02 mmol, 67%) as an off-white solid.

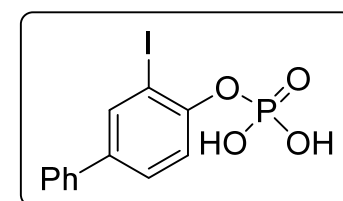

<sup>1</sup>H NMR (600 MHz, DMSO-*d*<sub>6</sub>) δ 8.07 (d, *J* = 2.3 Hz, 1H), 7.67 (dd, *J* = 8.6, 2.3 Hz, 1H), 7.63 (d, *J* = 7.6 Hz, 2H), 7.49 – 7.42 (m, 3H), 7.37 (t, *J* = 7.4 Hz, 1H). <sup>13</sup>C NMR (151 MHz, DMSO-*d*<sub>6</sub>) δ 151.2 (d, *J* = 5.2 Hz), 138.1, 137.6, 137.0, 129.0, 127.8, 127.6, 126.6, 119.9 (d, *J* = 2.4 Hz), 90.4 (d, *J* = 8.7 Hz). HRMS(ESI): *m/z* [M-H]<sup>-</sup> calculated for C<sub>12</sub>H<sub>9</sub>I<sub>2</sub>O<sub>4</sub>P: 374.9289; found 374.9278. IR (ATR)  $\tilde{\nu}$  = 3058, 3025, 2653, 2356, 2119, 1472, 1196, 1027, 998. Mp = 144-146 °C.

#### 4-Chloro-2-iodophenyl dihydrogen phosphate (**11e**)

Following GP1, the reaction of 4-chloro-2-iodophenol (1.02 g, 4.00 mmol) with NEt<sub>3</sub> (558 μL, 4.00 mmol) in Et<sub>2</sub>O (20 mL) and POCl<sub>3</sub> (1.12 mL, 12.0 mmol) in Et<sub>2</sub>O (20 mL) gave the product **11e** (1.31 g, 3.92 mmol, 98%) as an off-white solid.

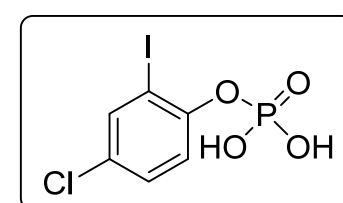

<sup>1</sup>H NMR (601 MHz, DMSO-*d*<sub>6</sub>) δ 7.88 (d, *J* = 2.6 Hz, 1H), 7.46 (dd, *J* = 8.8, 2.6 Hz, 1H), 7.37 (d, *J* = 8.8 Hz, 1H). <sup>13</sup>C NMR (151 MHz, DMSO-*d*<sub>6</sub>) δ 150.9 (d, *J* = 5.2 Hz), 138.0, 129.2, 128.3, 120.7 (d, *J* = 2.5 Hz), 91.0 (d, *J* = 8.8 Hz). HRMS(ESI): *m/z* [M-H]<sup>-</sup> calculated for C<sub>6</sub>H<sub>4</sub>I<sub>2</sub>O<sub>4</sub>P: 332.8586; found 332.8576. IR (ATR)  $\tilde{\nu}$  = 3083, 2615, 2119, 1570, 1462, 1193, 981. Mp = 164-166 °C.

### 2-Iodo-4-(trifluoromethyl)phenyl dihydrogen phosphate (**11f**)

Following GP1, the reaction of 2-iodo-4-(trifluoromethyl)phenol (1.15 g, 4.00 mmol) with NEt<sub>3</sub> (558 μL, 4.00 mmol) in Et<sub>2</sub>O (20 mL) and POCl<sub>3</sub> (1.12 mL, 12.0 mmol) in Et<sub>2</sub>O (20 mL) gave the product **11f** (1.38 g, 3.75 mmol, 94%) as an off-white solid.

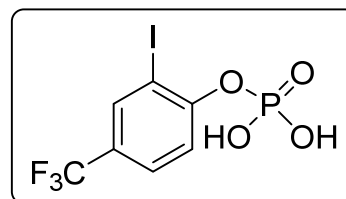

<sup>1</sup>H NMR (600 MHz, DMSO-*d*<sub>6</sub>) δ 8.14 (d, *J* = 2.3 Hz, 1H), 7.78 (dd, *J* = 8.7, 2.3 Hz, 1H), 7.57 (d, *J* = 8.6 Hz, 1H). <sup>13</sup>C NMR (151 MHz, DMSO-*d*<sub>6</sub>) δ 155.0 (d, *J* = 4.7 Hz), 136.1 (d, *J* = 3.7 Hz), 126.9 (d, *J* = 3.7 Hz), 125.7 (q, *J* = 32.5 Hz), 123.2 (q, *J* = 272.2 Hz), 119.8 (d, *J* = 2.5 Hz), 90.5 (d, *J* = 9.2 Hz). <sup>19</sup>F NMR (565 MHz, DMSO-*d*<sub>6</sub>) δ -60.4 (s). IR (ATR)  $\tilde{\nu}$  = 3110, 2753, 1601, 1487, 1314, 1176, 1028, 970. HRMS(ESI): *m/z* [M-H]<sup>-</sup> calculated for C<sub>7</sub>H<sub>4</sub>F<sub>3</sub>IO<sub>4</sub>P<sup>-</sup> 366.8850; found 366.8810. IR (ATR)  $\tilde{\nu}$  = 3110, 3085, 1601, 1487, 1314, 1176, 1117, 970. Mp = 140-142 °C

### 4-Acetyl-2-iodophenyl dihydrogen phosphate (**11g**)

Following GP1, the reaction of 1-(4-hydroxy-3-iodophenyl)ethan-1-one (232 mg, 885 μmol) with NEt<sub>3</sub> (123 μL, 885 μmol) in Et<sub>2</sub>O (4.4 mL) and POCl<sub>3</sub> (248 μL, 2.66 mmol) in Et<sub>2</sub>O (4.4 mL) gave the product **11g** (264 mg, 773 μmol, 87%) as an off-white solid.

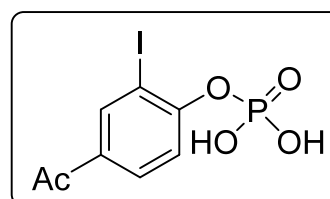

<sup>1</sup>H NMR (601 MHz, DMSO-*d*<sub>6</sub>) δ 8.34 (d, *J* = 1.3 Hz, 1H), 7.98 (dd, *J* = 8.6, 2.2 Hz, 1H), 7.50 (d, *J* = 7.6 Hz, 1H), 2.55 (s, 3H). <sup>13</sup>C NMR (151 MHz, DMSO-*d*<sub>6</sub>) δ 195.8, 155.3 (d, *J* = 4.9 Hz), 139.3, 133.9, 129.9, 119.1 (d, *J* = 2.4 Hz), 90.0 (d, *J* = 9.1 Hz), 26.7. HRMS(ESI): *m/z* [M-H]<sup>-</sup> calculated for C<sub>8</sub>H<sub>7</sub>IO<sub>5</sub>P<sup>-</sup>: 340.9081; found 340.9068. IR (ATR)  $\tilde{\nu}$  = 2923, 1628, 1581, 1251, 1215, 1098, 1037, 961, 915. Mp = 176-178 °C (decomp.).

### 5-Bromo-2-iodophenyl dihydrogen phosphate (**11h**)

Following GP1, the reaction of 5-bromo-2-iodophenol (897 mg, 3.00 mmol) with NEt<sub>3</sub> (418 μL, 3.00 mmol) in Et<sub>2</sub>O (15 mL) and POCl<sub>3</sub> (841 μL, 9.00 mmol) in Et<sub>2</sub>O (15 mL) gave the product **11h** (1.11 g, 2.93 mmol, 98%) as an off-white solid.

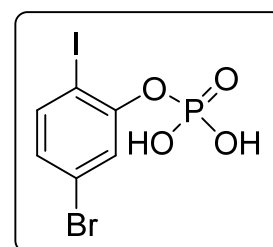

<sup>1</sup>H NMR (601 MHz, DMSO-*d*<sub>6</sub>) δ 7.77 (d, *J* = 8.4 Hz, 1H), 7.56 (d, *J* = 1.3 Hz, 1H), 7.12 (dd, *J* = 8.4, 2.2 Hz, 1H). <sup>13</sup>C NMR (151 MHz, DMSO-*d*<sub>6</sub>) δ 152.6 (d, *J* = 5.2 Hz), 140.6, 128.4, 122.4 (d, *J* = 2.6 Hz), 121.4, 88.9 (d, *J* = 8.9 Hz). HRMS(ESI): *m/z* [M-H]<sup>+</sup>

calculated for  $C_6H_4BrIO_4P^+$ : 376.8081; found 376.8068. IR (ATR)  $\tilde{\nu}$  = 3079, 2699, 2319, 1561, 1456, 1378, 1178, 975. Mp = 174-176 °C.

### 2-Bromo-6-iodophenyl dihydrogen phosphate (11i)

Following GP1, the reaction of 2-bromo-6-iodophenol (299 mg, 1.00 mmol) with  $NEt_3$  (139  $\mu$ L, 1.00 mmol) in  $Et_2O$  (5 mL) and  $POCl_3$  (280  $\mu$ L, 3.00 mmol) in  $Et_2O$  (5 mL) gave the product **11i** (368 mg, 970  $\mu$ mol, 97%) as an off-white solid.

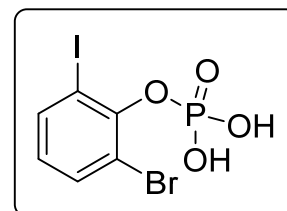

$^1H$  NMR (601 MHz,  $DMSO-d_6$ )  $\delta$  7.83 (dd,  $J$  = 7.9, 1.6 Hz, 1H), 7.64 (dd,  $J$  = 7.9, 1.5 Hz, 1H), 6.84 (td,  $J$  = 7.9, 1.3 Hz, 1H).  $^{13}C$  NMR (151 MHz,  $DMSO-d_6$ )  $\delta$  149.9 (d,  $J$  = 7.1 Hz), 139.1, 133.6, 127.6, 115.7 (d,  $J$  = 3.6 Hz), 92.6 (d,  $J$  = 4.2 Hz). HRMS(ESI):  $m/z$   $[M-H]^-$  calculated for  $C_6H_4BrIO_4P^-$ : 376.8081; found 376.8069. IR (ATR)  $\tilde{\nu}$  = 2849, 1560, 1421, 1127, 1043, 973, 762, 702. Mp = 172-174 °C.

### 3-Bromo-2-iodophenyl dihydrogen phosphate (11j)

Following GP1, the reaction of 3-bromo-2-iodophenol (149 mg, 500  $\mu$ mol) with  $NEt_3$  (69.7  $\mu$ L, 500  $\mu$ mol) in  $Et_2O$  (2.5 mL) and  $POCl_3$  (140  $\mu$ L, 1.50 mmol) in  $Et_2O$  (2.5 mL) gave the product **11j** (165 mg, 437  $\mu$ mol, 87%) as an off-white solid.

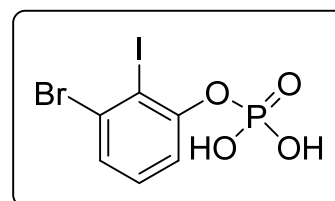

$^1H$  NMR (600 MHz,  $DMSO-d_6$ )  $\delta$  7.48 (d,  $J$  = 7.6 Hz, 1H), 7.39 – 7.29 (m, 2H).  $^{13}C$  NMR (151 MHz,  $DMSO-d_6$ )  $\delta$  153.5 (d,  $J$  = 5.1 Hz), 130.5, 130.2, 127.8, 118.1 (d,  $J$  = 2.6 Hz), 98.9 (d,  $J$  = 8.8 Hz). HRMS(ESI):  $m/z$   $[M-H]^-$  calculated for  $C_6H_4BrIO_4P^-$ : 376.8081; found 376.8065. IR (ATR)  $\tilde{\nu}$  = 2953, 2918, 2850, 2359, 2339, 1558, 1433, 1409, 1244, 1190, 1042, 784. Mp = 146-148 °C. Mp = 146-148 °C

### 1-Iodonaphthalen-2-yl dihydrogen phosphate (11k)

Following GP1, the reaction of 1-iodonaphthalen-2-ol (540 mg, 2.00 mmol) with  $NEt_3$  (279  $\mu$ L, 2.00 mmol) in  $Et_2O$  (10 mL) and  $POCl_3$  (561  $\mu$ L, 6.00 mmol) in  $Et_2O$  (10 mL) gave the product **11k** (659 mg, 1.99 mmol, 99%) as a brown solid.

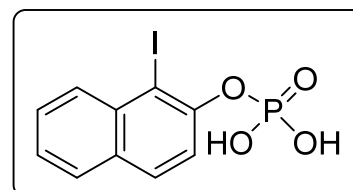

$^1H$  NMR (601 MHz,  $DMSO-d_6$ )  $\delta$  8.09 (d,  $J$  = 8.5 Hz, 1H), 7.97 (d,  $J$  = 8.9 Hz, 1H), 7.92 (d,  $J$  = 8.2 Hz, 1H), 7.67 – 7.62 (m, 2H), 7.52 (t,  $J$  = 7.5 Hz, 1H).  $^{13}C$  NMR (151 MHz,  $DMSO-d_6$ )  $\delta$

150.7 (d,  $J = 5.3$  Hz), 134.9, 131.3, 130.6, 129.9, 128.5 (2xC), 125.7, 119.7, 92.3 (d,  $J = 8.9$  Hz). HRMS(ESI):  $m/z$   $[M-H]^-$  calculated for  $C_{10}H_7IO_4P^-$ : 348.9132; found 348.9128. IR (ATR)  $\tilde{\nu} = 3047, 2305, 1591, 1499, 1353, 1212, 1108, 1033, 1014, 968$ . Mp = 169-171 °C.

## 4.2. Syntheses of Iodosoarylphosphoric Acids

### 1,3-Dihydroxy-7-methyl-1*H*-1 $\lambda^3$ -benzo[e][1,2,4,3]iodadioxaphosphinine 3-oxide (**8a**)

Following GP2, the reaction of **11a** (1.56 g, 5.00 mmol) with *m*CPBA (2.47 g, 10.0 mmol) in DCM (25 mL) gave the product **8a** (1.47 g, 4.45 mmol, 89%) as a colourless solid.

$^1H$  NMR (600 MHz, DMSO- $d_6$ )  $\delta$  8.48 (s, 1H), 7.70 (s, 1H), 7.35 (dd,  $J = 8.3, 2.0$  Hz, 1H), 7.12 (dd,  $J = 8.2, 1.3$  Hz, 1H), 2.34 (s, 3H).  $^{13}C$  NMR (151 MHz, DMSO- $d_6$ )  $\delta$  148.9 (d,  $J = 8.1$  Hz), 135.2, 133.3, 130.9, 122.4 (d,  $J = 4.0$  Hz), 116.9 (d,  $J = 3.5$  Hz), 20.2. HRMS(ESI):  $m/z$   $[M+Na]^+$  calculated for  $C_7H_8INaO_4P^+$ : 336.9097; found 336.9096. IR (ATR)  $\tilde{\nu} = 3364, 3075, 2927, 2479, 2278, 2114, 1667, 1482, 1227, 1129, 1040, 906$ . Mp = 94-96 °C (decomp.).

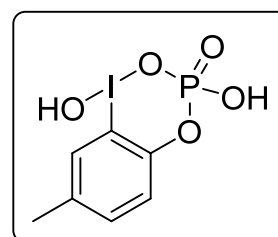

*Note: Only one signal of one hydroxy group is visible in the  $^1H$ -NMR. This is also present in the following spectra of **8**.*

### 1,3-Dihydroxy-1*H*-1 $\lambda^3$ -benzo[e][1,2,4,3]iodadioxaphosphinine 3-oxide (**8b**)

Following GP2, the reaction of **11b** (600 mg, 2.00 mmol) with *m*CPBA (986 mg, 4.00 mmol) in DCM (10 mL) gave the product **8b** (628 mg, 1.99  $\mu$ mol, 99%) as a colourless solid.

$^1H$  NMR (600 MHz, DMSO- $d_6$ )  $\delta$  8.56 (s, 1H), 7.91 (d,  $J = 8.1$  Hz, 1H), 7.55 (t,  $J = 7.7$  Hz, 1H), 7.35 (t,  $J = 7.7$  Hz, 1H), 7.24 (d,  $J = 8.0$  Hz, 1H).  $^{13}C$  NMR (151 MHz, DMSO- $d_6$ )  $\delta$  151.1 (d,  $J = 8.1$  Hz), 132.8, 131.2, 125.70, 122.8 (d,  $J = 4.1$  Hz), 117.3 (d,  $J = 3.5$  Hz). MS(ESI):  $m/z = 301.0$   $[M+H]^+$ . IR (ATR)  $\tilde{\nu} = 2927, 2522, 1634, 1464, 1227, 1117, 907, 772$ . Mp = 115-117 °C (decomp.). The analytical data is in accordance with the literature data.<sup>7</sup>

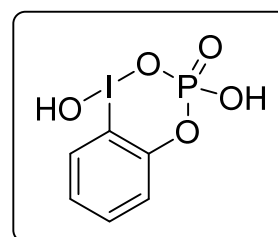

### 7-(*Tert*-butyl)-1,3-dihydroxy-1*H*-1 $\lambda^3$ -benzo[e][1,2,4,3]iodadioxaphosphinine 3-oxide (**8c**)

Following GP2, the reaction of **11c** (178 mg, 500  $\mu$ mol) with *m*CPBA (148 mg, 600  $\mu$ mol, 1.20 eq.) in DCM (2.5 mL) at room temperature gave the product **8c** (111 mg, 298  $\mu$ mol, 60%) as a colourless solid.

$^1\text{H}$  NMR (601 MHz, DMSO- $d_6$ )  $\delta$  8.60 (s, 1H), 7.92 (d,  $J$  = 2.3 Hz, 1H), 7.58 (dd,  $J$  = 8.5, 2.3 Hz, 1H), 7.19 – 7.13 (m, 1H), 1.30 (s,

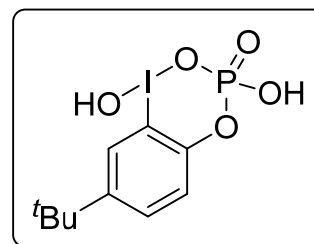

9H).  $^{13}\text{C}$  NMR (151 MHz, DMSO- $d_6$ )  $\delta$  148.8 (d,  $J$  = 8.2 Hz), 148.4, 129.8, 127.7, 122.2, 117.0 (d,  $J$  = 3.2 Hz), 34.7, 31.0. HRMS(ESI):  $m/z$  [M-H $_2$ O+Na+MeO] $^+$  calculated for C $_{11}$ H $_{16}$ INaO $_5$ P $^+$ : 408.9672; found 408.9670. IR (ATR)  $\tilde{\nu}$  = 2961, 2869, 2359, 1484, 1387, 1261, 1143, 1037, 947, 902. Mp = 100 -102  $^\circ\text{C}$  (decomp.).

### 1,3-Dihydroxy-7-phenyl-1*H*-1 $\lambda^3$ -benzo[e][1,2,4,3]iodadioxaphosphinine 3-oxide (**8d**)

Following GP2, the reaction of **11d** (188 mg, 500  $\mu$ mol) with *m*CPBA (247 mg, 1.00 mmol) in DCM (2.5 mL) gave the product **8d** (191 mg, 488  $\mu$ mol, 98%) as a colourless solid.

$^1\text{H}$  NMR (600 MHz, DMSO- $d_6$ )  $\delta$  8.64 (s, 1H), 8.19 (d,  $J$  = 2.0 Hz, 1H), 7.84 (d,  $J$  = 8.3 Hz, 1H), 7.67 (d,  $J$  = 7.7 Hz, 2H), 7.51 (t,  $J$  =

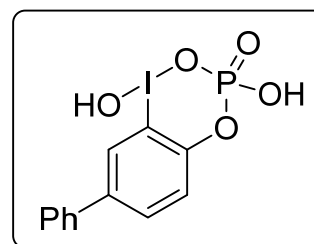

7.6 Hz, 2H), 7.42 (t,  $J$  = 7.4 Hz, 1H), 7.32 (d,  $J$  = 8.4 Hz, 1H).  $^{13}\text{C}$  NMR (151 MHz, DMSO- $d_6$ )  $\delta$  150.6 (d,  $J$  = 7.9 Hz), 138.2, 137.7, 130.9, 129.2, 129.2, 128.0, 126.7, 123.1 (d,  $J$  = 4.1 Hz), 117.8 (d,  $J$  = 3.3 Hz). HRMS(ESI):  $m/z$  [M+Na] $^+$  calculated for C $_{13}$ H $_{12}$ INaO $_5$ P $^+$ : 428.9359; found 428.9357. IR (ATR)  $\tilde{\nu}$  = 3429, 2917, 2359, 2327, 1694, 1474, 1383, 1235, 1131, 1073, 763. Mp = 88-90  $^\circ\text{C}$  (decomp.).

### 7-Chloro-1,3-dihydroxy-1*H*-1 $\lambda^3$ -benzo[e][1,2,4,3]iodadioxaphosphinine 3-oxide (**8e**)

Following GP2, the reaction of **11e** (134 mg, 400  $\mu$ mol) with *m*CPBA (197 mg, 800  $\mu$ mol) in DCM (2 mL) gave the product **8e** (89.1 mg, 254  $\mu$ mol, 64%) as a colourless solid.

$^1\text{H}$  NMR (600 MHz, DMSO- $d_6$ )  $\delta$  8.73 (s, 1H), 7.93 (d,  $J$  = 2.5 Hz, 1H), 7.63 (dd,  $J$  = 8.7, 2.5 Hz, 1H), 7.26 (dd,  $J$  = 8.6, 1.2 Hz, 1H).

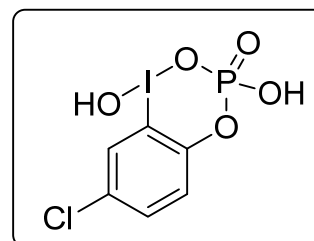

$^{13}\text{C}$  NMR (151 MHz, DMSO- $d_6$ )  $\delta$  150.3 (d,  $J$  = 8.0 Hz), 132.7, 130.5, 129.0, 124.1 (d,  $J$  = 4.2 Hz), 117.8 (d,  $J$  = 3.3 Hz). HRMS(ESI):  $m/z$  [M-H $_2$ O+Na+MeO] $^+$  calculated for C $_7$ H $_7$ ClINaO $_5$ P $^+$ : 386.8657; found 386.8662. IR (ATR)  $\tilde{\nu}$  = 3445, 3340, 3094, 2498, 1645, 1465, 1121, 1022, 974. Mp = 102-104  $^\circ\text{C}$  (decomp.).

### 1,3-Dihydroxy-7-(trifluoromethyl)-1*H*-1 $\lambda^3$ -benzo[e][1,2,4,3]iodadioxaphosphinine 3-oxide (**8f**)

Following GP2, the reaction of **11f** (147 mg, 400  $\mu$ mol) with *m*CPBA (197 mg, 800  $\mu$ mol) in DCM (2 mL) gave the product **8f** (122 mg, 318  $\mu$ mol, 79%) as a colourless solid.

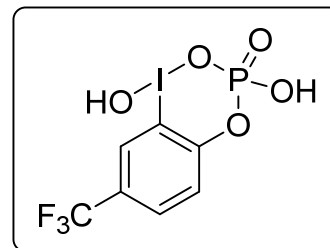

$^1\text{H}$  NMR (601 MHz, DMSO- $d_6$ )  $\delta$  8.87 (s, 1H), 8.27 (d,  $J$  = 2.2 Hz, 1H), 7.95 (dd,  $J$  = 8.6, 2.2 Hz, 1H), 7.44 (d,  $J$  = 8.5 Hz, 1H).

$^{13}\text{C}$  NMR (151 MHz, DMSO- $d_6$ )  $\delta$  154.4 (d,  $J$  = 7.5 Hz), 130.0, 128.8, 125.9 (q,  $J$  = 32.7 Hz), 123.7 (d,  $J$  = 4.3 Hz), 123.4 (q,  $J$  = 272.4 Hz), 117.6.  $^{19}\text{F}$  NMR (565 MHz, DMSO- $d_6$ )  $\delta$  -60.53 (s). HRMS(ESI):  $m/z$  [M-H $_2$ O+2Na+MeO] $^+$  calculated for C $_8$ H $_6$ F $_3$ INa $_2$ O $_5$ P $^+$ : 442.8740; found 442.8737. IR (ATR)  $\tilde{\nu}$  = 3094, 3073, 1604, 1489, 1315, 1272, 1114, 1023, 967, 902. Mp = 94-96  $^\circ\text{C}$  (decomp.).

### 6-Bromo-1,3-dihydroxy-1*H*-1 $\lambda^3$ -benzo[e][1,2,4,3]iodadioxaphosphinine 3-oxide (**8h**)

Following GP2, the reaction of **11h** (189 mg, 500  $\mu$ mol) with *m*CPBA (148 mg, 1.00 mmol) in DCM (2.5 mL) gave the product **8h** (181 mg, 459  $\mu$ mol, 92%) as a colourless solid.

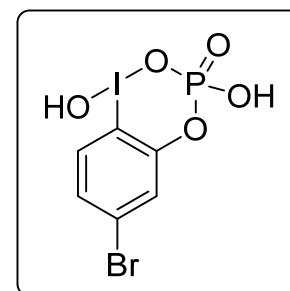

$^1\text{H}$  NMR (601 MHz, DMSO- $d_6$ )  $\delta$  8.71 (s, 1H), 7.83 (d,  $J$  = 8.6 Hz, 1H), 7.62 – 7.58 (m, 1H), 7.47 (dd,  $J$  = 2.1, 1.2 Hz, 1H).  $^{13}\text{C}$  NMR (151 MHz, DMSO- $d_6$ )  $\delta$  152.0 (d,  $J$  = 7.7 Hz), 140.6, 132.8, 128.6,

125.5 (d,  $J$  = 4.4 Hz), 116.4 (d,  $J$  = 3.4 Hz). HRMS(ESI):  $m/z$  [M-OH+Na+MeO] $^+$  calculated for C $_7$ H $_7$ BrINaO $_5$ P $^+$ : 430.8151; found 430.8148. IR (ATR)  $\tilde{\nu}$  = 3085, 2997, 2480, 1570, 1557, 1456, 1385, 1123, 1039, 928, 804. Mp = 113-115  $^\circ\text{C}$  (decomp.).

### 5-Bromo-1,3-dihydroxy-1*H*-1 $\lambda^3$ -benzo[e][1,2,4,3]iodadioxaphosphinine 3-oxide (**8i**)

Following GP2, the reaction of **11i** (189 mg, 500  $\mu$ mol) with *m*CPBA (247 mg, 1.00 mmol) in DCM (2.5 mL) gave the product **8i** (154 mg, 390  $\mu$ mol, 78%) as a colourless solid.

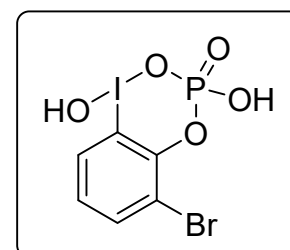

$^1\text{H}$  NMR (601 MHz, DMSO- $d_6$ )  $\delta$  8.76 (s, 1H), 7.91 (dd,  $J$  = 8.1, 1.4 Hz, 1H), 7.86 (dd,  $J$  = 8.1, 1.4 Hz, 1H), 7.27 (td,  $J$  = 8.0, 0.9 Hz, 1H).

$^{13}\text{C}$  NMR (151 MHz, DMSO- $d_6$ )  $\delta$  148.5 (d,  $J$  = 7.7 Hz), 136.4, 131.3, 127.1, 119.0 (d,  $J$  = 3.6 Hz), 116.3 (d,  $J$  = 4.5 Hz). HRMS(ESI):  $m/z$  [M-OH+Na+MeO] $^+$  calculated for

$C_7H_7BrINaO_5P^+$ : 430.8151; found 430.8150. IR (ATR)  $\tilde{\nu}$  = 2919, 2360, 1557, 1441, 1430, 1144, 1084, 946, 897. Mp = 114-116 °C (decomp.).

### 4.3. Synthesis of 1-Aryliodoarylphosphonic Acids

#### 3-Hydroxy-1-mesityl-7-methyl-1*H*-1 $\lambda^3$ -benzo[e][1,2,4,3]iodadioxaphosphinine 3-oxide (9a)

Following GP4, the reaction of **8a** (330 mg, 1.00 mmol) with mesitylene (278  $\mu$ L, 2.00 mmol) in TFE (10 mL) at 50 °C for 16 h gave the product **9a** (379 mg, 877  $\mu$ mol, 88%) as a colourless solid.

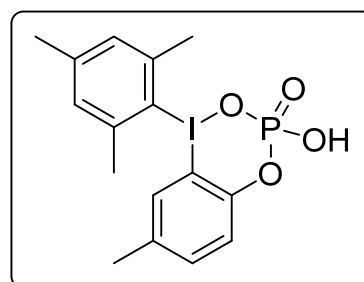

$^1H$  NMR (601 MHz, DMSO- $d_6$  + TFA)  $\delta$  7.70 (d,  $J$  = 2.0 Hz, 1H), 7.50 – 7.39 (m, 2H), 7.17 (s, 2H), 2.59 (s, 6H), 2.28 (s, 3H), 2.25 (s, 3H).  $^{13}C$  NMR (151 MHz, DMSO- $d_6$  + TFA)  $\delta$  148.6 (d,  $J$  = 5.4 Hz), 143.1, 142.1, 136.6, 136.2, 134.6, 129.8, 122.3, 121.1, 107.5 (d,  $J$  = 7.7 Hz), 26.4, 20.6, 19.9. HRMS(ESI):  $m/z$   $[M+Na]^+$  calculated for  $C_{16}H_{18}INaO_4P^+$ : 454.9880; found 454.9879. IR (ATR)  $\tilde{\nu}$  = 2922, 2359, 1485, 2337, 1185, 1103, 912, 886. Mp = 154-156 °C (decomp.).

#### 3-Hydroxy-1-mesityl-1*H*-1 $\lambda^3$ -benzo[e][1,2,4,3]iodadioxaphosphinine 3-oxide (9b)

Following GP3, the reaction of **8b** (158 mg, 500  $\mu$ mol) with mesitylene (139  $\mu$ L, 1.00 mmol) in MeCN/TFA (1:1, 5 mL) gave the product **9b** (159 mg, 380  $\mu$ mol, 76%) as a colourless solid.

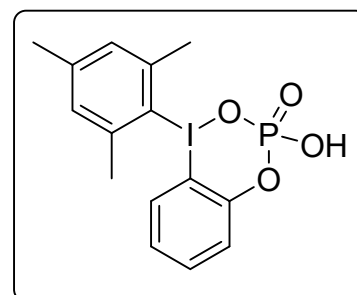

$^1H$  NMR (601 MHz, DMSO- $d_6$  + TFA)  $\delta$  7.54 (td,  $J$  = 7.9, 1.5 Hz, 1H), 7.50 (d,  $J$  = 8.1 Hz, 1H), 7.36 (d,  $J$  = 7.9 Hz, 1H), 7.18 (s, 2H), 7.10 (td,  $J$  = 7.8, 1.5 Hz, 1H), 2.53 (s, 6H), 2.29 (s, 3H).  $^{13}C$  NMR (151 MHz, DMSO- $d_6$  + TFA)  $\delta$  151.9 (d,  $J$  = 6.3 Hz), 142.7, 141.6, 134.2, 133.2, 129.5, 126.3, 123.1, 122.9, 109.9 (d,  $J$  = 3.0 Hz), 26.0, 20.6. HRMS(ESI):  $m/z$   $[M+Na]^+$  calculated for  $C_{15}H_{16}INaO_4P^+$ : 440.9723; found 440.9715. IR (ATR)  $\tilde{\nu}$  = 2972, 2917, 2360, 2340, 1465, 1261, 1177, 1100, 926, 885. Mp = 141- 143 °C (decomp.).



### 7-(*Tert*-butyl)-3-hydroxy-1-mesityl-1*H*-1 $\lambda^3$ -benzo[e][1,2,4,3]iodadioxaphosphinine 3-oxide (**9c**)

Following GP3, the reaction of **8c** (93.0 mg, 250  $\mu$ mol) with mesitylene (69.6  $\mu$ L, 500  $\mu$ mol) in MeCN/TFA (1:1, 2.5 mL) gave the product **9c** (92.2 mg, 194  $\mu$ mol, 78%) as a colourless solid.

$^1\text{H}$  NMR (601 MHz, DMSO- $d_6$ )  $\delta$  7.56 (dd,  $J$  = 8.6, 2.3 Hz, 1H), 7.49 (d,  $J$  = 2.4 Hz, 1H), 7.33 (d,  $J$  = 8.6 Hz, 1H), 7.18 (s, 2H), 2.56 (s, 6H), 2.28 (s, 3H), 1.13 (s, 9H).  $^{13}\text{C}$  NMR (151 MHz, DMSO- $d_6$ )  $\delta$  149.5 (d,  $J$  = 6.0 Hz), 148.5, 142.6, 141.7, 131.2, 130.2, 129.4, 123.1, 121.9, 108.9 (d,  $J$  = 5.6 Hz), 34.3, 30.7, 26.0, 20.5. HRMS(ESI):  $m/z$   $[\text{M}+\text{Na}]^+$  calculated for  $\text{C}_{19}\text{H}_{24}\text{INaO}_4\text{P}^+$ : 497.0349; found 497.0342. IR (ATR)  $\tilde{\nu}$  = 2961, 2868, 2359, 2342, 1772, 1489, 1245, 1170, 1139, 1014, 906. Mp = 149-151  $^\circ\text{C}$  (decomp.).

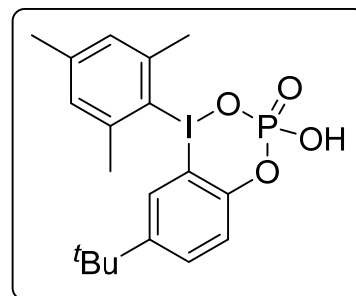

### 3-Hydroxy-1-mesityl-7-phenyl-1*H*-1 $\lambda^3$ -benzo[e][1,2,4,3]iodadioxaphosphinine 3-oxide (**9d**)

Following GP3, the reaction of **8d** (118 mg, 300  $\mu$ mol) with mesitylene (83.5  $\mu$ L, 600  $\mu$ mol) in MeCN/TFA (1:1, 3 mL) gave the product **9d** (112 mg, 226  $\mu$ mol, 75%) as a colourless solid.

$^1\text{H}$  NMR (601 MHz, DMSO- $d_6$ )  $\delta$  7.81 (dd,  $J$  = 8.5, 2.2 Hz, 1H), 7.65 – 7.56 (m, 1H), 7.47 – 7.39 (m, 5H), 7.38 – 7.33 (m, 1H), 7.17 (s, 2H), 2.57 (s, 6H), 2.27 (s, 3H).  $^{13}\text{C}$  NMR (151 MHz, DMSO- $d_6$ )  $\delta$  151.7 (d,  $J$  = 6.6 Hz), 142.6, 141.6, 137.8, 131.6, 131.3, 129.4, 129.2, 129.0, 128.0, 126.5, 123.6, 123.1, 111.1 (d,  $J$  = 5.2 Hz), 26.0, 20.5. HRMS(ESI):  $m/z$   $[\text{M}+\text{Na}]^+$  calculated for  $\text{C}_{21}\text{H}_{20}\text{INaO}_4\text{P}^+$ : 517.0036; found 517.0026. IR (ATR)  $\tilde{\nu}$  = 3030, 2977, 2918, 2359, 2325, 1662, 1474, 1178, 940, 892. Mp = 134-136  $^\circ\text{C}$  (decomp.).

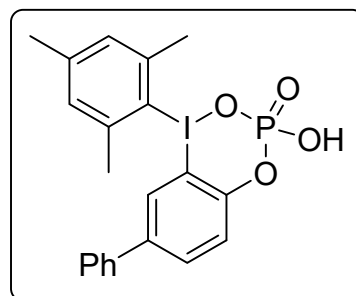

### 7-Chloro-3-hydroxy-1-mesityl-1*H*-1 $\lambda^3$ -benzo[e][1,2,4,3]iodadioxaphosphinine 3-oxide (9e)

Following GP3, the reaction of **8e** (175 mg, 500  $\mu$ mol) with mesitylene (139  $\mu$ L, 1.00 mmol) in MeCN/TFA (1:1, 5 mL) gave the product **9e** (158 mg, 349  $\mu$ mol, 70%) as a colourless solid.

$^1\text{H}$  NMR (601 MHz, DMSO- $d_6$ )  $\delta$  7.60 (dd,  $J$  = 8.7, 2.5 Hz, 1H), 7.40 (d,  $J$  = 2.5 Hz, 1H), 7.32 (dd,  $J$  = 8.7, 1.1 Hz, 1H), 7.19 (s, 2H), 2.52 (s, 6H), 2.31 (s, 3H).  $^{13}\text{C}$  NMR (151 MHz, DMSO- $d_6$ )

$\delta$  151.8 (d,  $J$  = 6.8 Hz), 142.8, 141.6, 132.9, 132.5, 129.6, 128.8, 124.3, 123.5, 111.3, 26.0, 20.6. HRMS(ESI):  $m/z$   $[\text{M}+\text{Na}]^+$  calculated for  $\text{C}_{15}\text{H}_{15}\text{I}\text{NaO}_4\text{P}^+$ : 474.9333; found 474.9330. IR (ATR)  $\tilde{\nu}$  = 3074, 2923, 1578, 1462, 1379, 1232, 1175, 1093, 936, 884, 764. Mp = 134-136  $^\circ\text{C}$  (decomp.).

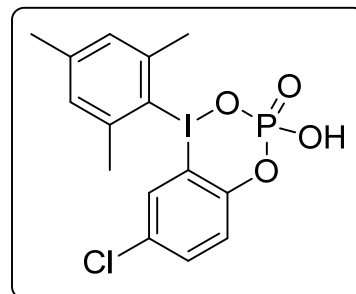

### 3-Hydroxy-1-mesityl-7-(trifluoromethyl)-1*H*-1 $\lambda^3$ -benzo[e][1,2,4,3]iodadioxaphosphinine 3-oxide (9f)

Following GP3, the reaction of **8f** (192 mg, 500  $\mu$ mol) with mesitylene (139  $\mu$ L, 1.00 mmol) in MeCN/TFA (1:1, 5 mL) gave the product **9f** (236 mg, 485  $\mu$ mol, 97%) as a colourless solid.

$^1\text{H}$  NMR (601 MHz, DMSO- $d_6$ +TFA)  $\delta$  7.90 (dd,  $J$  = 8.7, 2.2 Hz, 1H), 7.69 (s, 1H), 7.52 (d,  $J$  = 8.6 Hz, 1H), 7.18 (s, 2H), 2.53 (s, 6H), 2.29 (s, 3H).  $^{13}\text{C}$  NMR (151 MHz, DMSO- $d_6$ +TFA)  $\delta$  156.3

(d,  $J$  = 6.3 Hz), 142.8, 141.6, 130.9, 130.2, 129.5, 125.3 (q,  $J$  = 33.1 Hz), 123.8, 123.0 (q,  $J$  = 273.9 Hz), 116.8, 111.1 (d,  $J$  = 4.5 Hz), 25.9, 20.6.  $^{19}\text{F}$  NMR (565 MHz, DMSO- $d_6$ )  $\delta$  -60.54 (s). HRMS(ESI):  $m/z$   $[\text{M}+\text{Na}]^+$  calculated for  $\text{C}_{16}\text{H}_{15}\text{F}_3\text{I}\text{NaO}_4\text{P}^+$ : 508.9597; found 508.9588. IR (ATR)  $\tilde{\nu}$  = 2922, 1604, 1489, 1317, 1265, 1119, 1073, 887. Mp = 126-128  $^\circ\text{C}$  (decomp.).

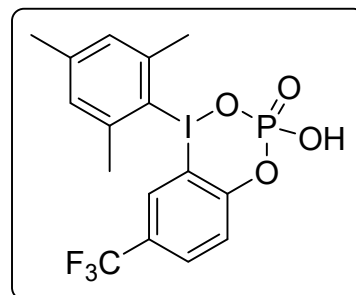

### 6-Bromo-3-hydroxy-1-mesityl-1*H*-1 $\lambda^3$ -benzo[e][1,2,4,3]iodadioxaphosphinine 3-oxide (9g)

Following GP3, the reaction of **8h** (118 mg, 300  $\mu$ mol) with mesitylene (83.5  $\mu$ L, 600  $\mu$ mol) in MeCN/TFA (1:1, 3 mL) gave the product **9g** (111 mg, 223  $\mu$ mol, 74%) as a colourless solid.

$^1\text{H}$  NMR (601 MHz, DMSO- $d_6$  + TFA)  $\delta$  7.89 (d,  $J$  = 8.6 Hz, 1H), 7.75 (d,  $J$  = 2.2 Hz, 1H), 7.42 (dd,  $J$  = 8.6, 2.2 Hz, 1H), 7.18 (s, 2H), 2.58 (s, 6H), 2.28 (s, 3H).  $^{13}\text{C}$  NMR (151 MHz, DMSO- $d_6$  + TFA)  $\delta$  148.1 (d,  $J$  = 7.0 Hz), 143.3, 141.5, 136.8, 133.1, 129.8, 128.6, 124.4, 117.0 (d,  $J$  = 4.2 Hz), 111.4, 26.0, 20.6. HRMS(ESI):  $m/z$  [M+Na] $^+$  calculated for C<sub>15</sub>H<sub>15</sub>BrINaO<sub>4</sub>P $^+$ : 518.8828; found 518.8824. IR (ATR)  $\tilde{\nu}$  = 2917, 1733, 1564, 1456, 1385, 1196, 1098, 900. Mp = 165-167  $^\circ\text{C}$  (decomp.).

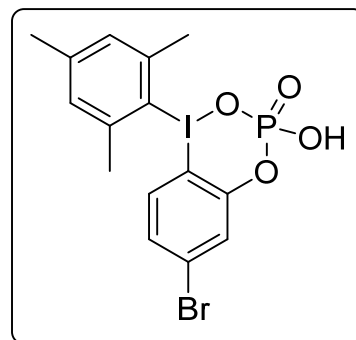

### 5-Bromo-3-hydroxy-1-mesityl-1*H*-1 $\lambda^3$ -benzo[e][1,2,4,3]iodadioxaphosphinine 3-oxide (9h)

Following GP3, the reaction of **8i** (98.7 mg, 250  $\mu$ mol) with mesitylene (69.6  $\mu$ L, 500  $\mu$ mol) in MeCN/TFA (1:1, 2.5 mL) gave the product **9h** (117 mg, 235  $\mu$ mol, 94%) as a colourless solid.

$^1\text{H}$  NMR (601 MHz, DMSO- $d_6$ )  $\delta$  7.87 (dd,  $J$  = 7.9, 1.3 Hz, 1H), 7.35 (dd,  $J$  = 8.2, 1.4 Hz, 1H), 7.22 (s, 2H), 7.06 (t,  $J$  = 8.0 Hz, 1H), 2.31 (s, 3H).  $^{13}\text{C}$  NMR (151 MHz, DMSO- $d_6$ )  $\delta$  148.5 (d,  $J$  = 7.0 Hz), 143.7, 141.9, 137.2, 133.5, 130.2, 129.0, 124.8, 117.4 (d,  $J$  = 4.2 Hz), 111.8, 26.4, 21.0. HRMS(ESI):  $m/z$  [M+Na] $^+$  calculated for C<sub>15</sub>H<sub>15</sub>BrINaO<sub>4</sub>P $^+$ : 518.8828; found 518.8825. IR (ATR)  $\tilde{\nu}$  = 2918, 2360, 1435, 1178, 1109, 930, 873, 754. Mp = 147-149  $^\circ\text{C}$  (decomp.).

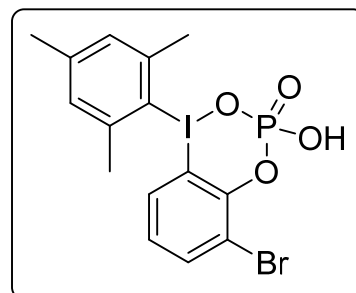

### 3-Hydroxy-7-methyl-1-(2,4,6-trimethoxyphenyl)-1*H*-1 $\lambda^3$ -benzo[e][1,2,4,3]iodadioxaphosphinine 3-oxide (**9i**)

Following GP4, the reaction of **8a** (165 mg, 500  $\mu$ mol) with 1,3,5-trimethoxy benzene (168 mg, 1.00 mmol) in TFE (5 mL) at room temperature for 18 h gave the product **9i** (220 mg, 458  $\mu$ mol, 92%) as a colourless solid.

$^1\text{H}$  NMR (601 MHz, DMSO- $d_6$  + TFA)  $\delta$  7.59 – 7.54 (m, 1H), 7.42 – 7.33 (m, 2H), 6.42 (s, 2H), 3.90 (s, 6H), 3.85 (s, 3H), 2.24 (s, 3H).  $^{13}\text{C}$  NMR (151 MHz, DMSO- $d_6$  + TFA)  $\delta$  166.5, 160.0, 148.3 (d,  $J$  = 5.2 Hz), 136.5, 135.7, 134.2, 120.9, 109.4 (d,  $J$  = 7.6 Hz), 92.1, 86.8, 57.4, 56.2, 20.0. HRMS(ESI):  $m/z$  [M+Na] $^+$  calculated for C<sub>16</sub>H<sub>18</sub>INaO<sub>7</sub>P $^+$ : 502.9727; found 502.9727. IR (ATR)  $\tilde{\nu}$  = 2949, 2359, 1580, 1341, 1206, 1097, 812. Mp = 165-167  $^\circ\text{C}$  (decomp.).

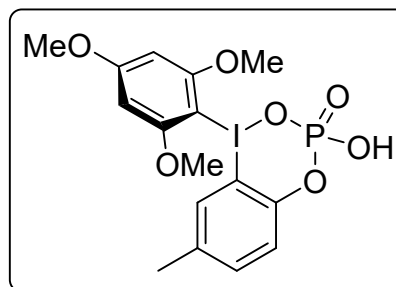

### 3-Hydroxy-7-methyl-1-(thiophen-2-yl)-1*H*-1 $\lambda^3$ -benzo[e][1,2,4,3]iodadioxaphosphinine 3-oxide (**9j**)

Following GP4, the reaction of **8a** (165 mg, 500  $\mu$ mol) with thiophene (80.1  $\mu\text{L}$ , 1.00 mmol) in TFE (5 mL) at room temperature for 18 h gave the product **9j** (220 mg, 458  $\mu$ mol, 92%) as a colourless solid.

$^1\text{H}$  NMR (601 MHz, DMSO- $d_6$  + TFA)  $\delta$  8.12 – 8.03 (m, 1H), 8.00 (d,  $J$  = 3.7 Hz, 1H), 7.94 (d,  $J$  = 5.3 Hz, 1H), 7.49 – 7.40 (m, 2H), 7.15 (dd,  $J$  = 5.3, 3.8 Hz, 1H), 2.28 (s, 3H).  $^{13}\text{C}$  NMR (151 MHz, DMSO- $d_6$  + TFA)  $\delta$  148.0 (d,  $J$  = 5.3 Hz), 140.7, 137.3, 136.4, 136.1, 134.9, 129.6, 120.6, 112.5, 100.6, 20.0. HRMS(ESI):  $m/z$  [M+Na] $^+$  calculated for C<sub>11</sub>H<sub>10</sub>INaO<sub>4</sub>PS $^+$ : 418.8974; found 418.8973. IR (ATR)  $\tilde{\nu}$  = 3112, 2924, 2356, 1488, 1227, 1191, 1101, 905, 720. Mp = 160-162  $^\circ\text{C}$  (decomp.).

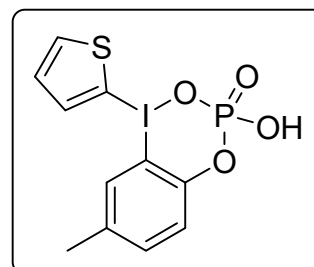

### 3-Hydroxy-7-methyl-1-phenyl-1*H*-1 $\lambda^3$ -benzo[e][1,2,4,3]iodadioxaphosphinine 3-oxide (**9k**)

Following GP3, the reaction of **8a** (165 mg, 500  $\mu$ mol) with trimethyl(phenyl)silane (129  $\mu\text{L}$ , 750  $\mu$ mol, 1.50 eq.) in MeCN/TFA (1:1, 5 mL) gave the product **9k** (143 mg, 367  $\mu$ mol, 73%) as a colourless solid.

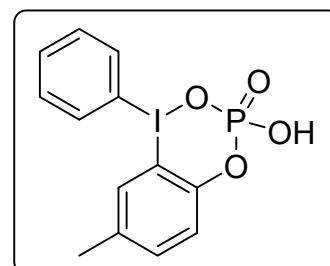

$^1\text{H}$  NMR (601 MHz,  $\text{DMSO-}d_6$ )  $\delta$  8.19 (d,  $J$  = 7.9 Hz, 2H), 7.71 – 7.62 (m, 2H), 7.51 (t,  $J$  = 7.7 Hz, 2H), 7.35 – 7.26 (m, 2H), 2.20 (s, 3H).  $^{13}\text{C}$  NMR (151 MHz,  $\text{DMSO-}d_6$ )  $\delta$  149.6 (d,  $J$  = 6.3 Hz), 135.8, 135.3, 134.7, 133.9, 131.8, 131.5, 121.9, 117.0, 111.1 (d,  $J$  = 5.7 Hz), 19.9. HRMS(ESI):  $m/z$   $[\text{M}+\text{Na}]^+$  calculated for  $\text{C}_{13}\text{H}_{12}\text{I}\text{NaO}_4\text{P}^+$ : 412.9410; found 412.9407. IR (ATR)  $\tilde{\nu}$  = 2925, 1661, 1485, 1250, 1174, 896, 816. Mp = 146-148 °C (decomp.).

### 3-Hydroxy-7-methyl-1-(*p*-tolyl)-1*H*- $\lambda^3$ -benzo[*e*][1,2,4,3]iodadioxaphosphinine 3-oxide (9l)

Following GP3, the reaction of **8a** (165 mg, 500  $\mu\text{mol}$ ) with trimethyl(*p*-tolyl)silane (142  $\mu\text{L}$ , 750  $\mu\text{mol}$ , 1.50 eq.) in MeCN/TFA (1:1, 5 mL) gave the product **9l** (126 mg, 323  $\mu\text{mol}$ , 65%) as a colourless solid.

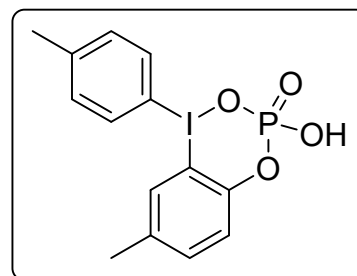

$^1\text{H}$  NMR (600 MHz,  $\text{DMSO-}d_6$ )  $\delta$  8.05 (d,  $J$  = 8.8 Hz, 2H), 7.67 (s, 1H), 7.35 – 7.26 (m, 4H), 2.34 (s, 3H), 2.20 (s, 3H).  $^{13}\text{C}$  NMR (151 MHz,  $\text{DMSO-}d_6$ )  $\delta$  149.5 (d,  $J$  = 6.2 Hz), 142.2, 135.7, 135.3, 134.6, 133.8, 132.1, 121.9, 113.3, 111.1 (d,  $J$  = 5.6 Hz), 20.9, 19.9. HRMS(ESI):  $m/z$   $[\text{M}+\text{Na}]^+$  calculated for  $\text{C}_{14}\text{H}_{14}\text{I}\text{NaO}_4\text{P}^+$ : 426.9567; found 426.9561. IR (ATR)  $\tilde{\nu}$  = 2923, 2359, 2341, 1661, 1484, 1273, 1159, 1117, 927, 901. Mp = 164-166 °C (decomp.).

### 1-(4-(*Tert*-butyl)phenyl)-3-hydroxy-7-methyl-1*H*- $\lambda^3$ -benzo[*e*][1,2,4,3]iodadioxaphosphinine 3-oxide (9m)

Following GP3, the reaction of **8a** (165 mg, 500  $\mu\text{mol}$ ) with (4-(*tert*-butyl)phenyl)trimethylsilane (155 mg, 750  $\mu\text{mol}$ , 1.50 eq.) in MeCN/TFA (1:1, 5 mL) gave the product **9m** (177 mg, 396  $\mu\text{mol}$ , 79%) as a colourless solid.

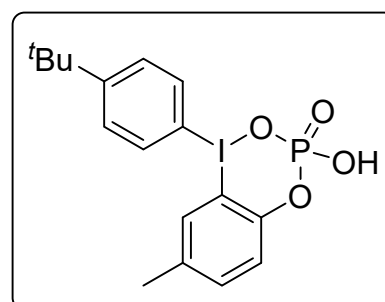

$^1\text{H}$  NMR (600 MHz,  $\text{DMSO-}d_6$ )  $\delta$  8.10 (d,  $J$  = 8.6 Hz, 2H), 7.78 (s, 1H), 7.51 (d,  $J$  = 8.7 Hz, 2H), 7.33 (d,  $J$  = 1.3 Hz, 2H), 2.22 (s, 3H), 1.25 (s, 9H).  $^{13}\text{C}$  NMR (151 MHz,  $\text{DMSO-}d_6$ )  $\delta$  155.0, 149.4 (d,  $J$  = 6.0 Hz), 135.5, 135.3, 135.1, 134.0, 128.6, 121.7, 113.2, 110.7 (d,  $J$  = 6.1 Hz), 34.9, 30.7, 19.9. HRMS(ESI):  $m/z$   $[\text{M}+\text{Na}]^+$  calculated for  $\text{C}_{17}\text{H}_{20}\text{I}\text{NaO}_4\text{P}^+$ : 469.0036; found 469.0031. IR (ATR)  $\tilde{\nu}$  = 2963, 2866, 2360, 2340, 1483, 1233, 1183, 1118, 937, 834. Mp = 152-154 °C (decomp.).

**3-Hydroxy-1-(4-methoxyphenyl)-7-methyl-1*H*-1 $\lambda^3$ -benzo[e][1,2,4,3]iodadioxaphosphinine 3-oxide (9n)**

Following GP4, the reaction of **8a** (330 mg, 1.00 mmol) with anisole (217  $\mu$ L, 2.00 mmol) in TFE (10 mL) at 50 °C for 16 h gave the product **9n** (273 mg, 650  $\mu$ mol, 65%) as a colourless solid.

$^1\text{H}$  NMR (601 MHz, DMSO- $d_6$ )  $\delta$  8.09 (d,  $J$  = 8.5 Hz, 2H), 7.44 (d,  $J$  = 2.0 Hz, 1H), 7.28 (d,  $J$  = 8.5 Hz, 1H), 7.18 (d,  $J$  = 8.2 Hz, 1H), 7.06 (d,  $J$  = 8.5 Hz, 2H), 3.81 (s, 3H), 2.17 (s, 3H).  $^{13}\text{C}$  NMR (151 MHz, DMSO- $d_6$ )  $\delta$  161.8, 150.1 (d,  $J$  = 6.7 Hz), 138.0, 134.9, 133.4, 133.3, 122.9, 117.1, 112.1 (d,  $J$  = 4.2 Hz), 106.5, 55.6, 20.0. HRMS(ESI):  $m/z$   $[\text{M}+\text{Na}]^+$  calculated for  $\text{C}_{14}\text{H}_{14}\text{I}\text{NaO}_5\text{P}^+$ : 442.9516; found 442.9514. IR (ATR)  $\tilde{\nu}$  = 2841, 1572, 1484, 1250, 1174, 1020, 893, 820. Mp = 144-146 °C (decomp.).

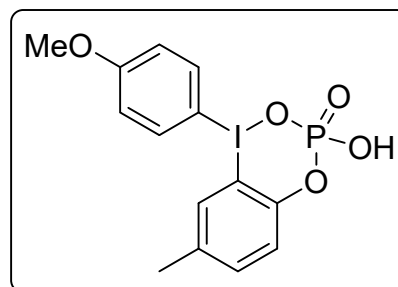

**1-(4-Chlorophenyl)-3-hydroxy-7-methyl-1*H*-1 $\lambda^3$ -benzo[e][1,2,4,3]iodadioxaphosphinine 3-oxide (9o)**

Following GP3, the reaction of **8a** (165 mg, 500  $\mu$ mol) with (4-chlorophenyl)trimethylsilane (92.4  $\mu$ L, 500  $\mu$ mol, 1.00 eq.) in MeCN/TFA (1:1, 5 mL) gave the product **9o** (158 mg, 372  $\mu$ mol, 74%) as a colourless solid.

$^1\text{H}$  NMR (600 MHz, DMSO- $d_6$ )  $\delta$  8.18 (d,  $J$  = 8.6 Hz, 2H), 7.60 – 7.53 (m, 3H), 7.32 (dd,  $J$  = 8.4, 2.0 Hz, 1H), 7.25 (d,  $J$  = 7.9 Hz, 1H), 2.19 (s, 3H).  $^{13}\text{C}$  NMR (151 MHz, DMSO- $d_6$ )  $\delta$  149.9 (d,  $J$  = 6.7 Hz), 137.7, 137.0, 135.2, 134.1, 133.7, 131.4, 122.5 (d,  $J$  = 2.7 Hz), 115.4, 111.8 (d,  $J$  = 4.8 Hz), 19.9. HRMS(ESI):  $m/z$   $[\text{M}+\text{Na}]^+$  calculated for  $\text{C}_{13}\text{H}_{11}\text{ClI}\text{NaO}_4\text{P}^+$ : 446.9020; found 446.9013. IR (ATR)  $\tilde{\nu}$  = 2924, 1659, 1485, 1389, 1238, 1174, 1086, 997, 900. Mp = 128-130 °C (decomp.).

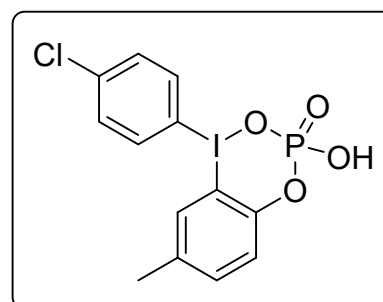

### 1-(4-Fluorophenyl)-3-hydroxy-7-methyl-1*H*-1 $\lambda^3$ -benzo[*e*][1,2,4,3]iodadioxaphosphinine 3-oxide (**9p**)

Following GP3, the reaction of **8a** (99.0 mg, 300  $\mu$ mol) with (4-fluorophenyl)trimethylsilane (53.1  $\mu$ L, 300  $\mu$ mol, 1.00 eq.) in MeCN/TFA (1:1, 3 mL) gave the product **9p** (101 mg, 247  $\mu$ mol, 83%) as a colourless solid.

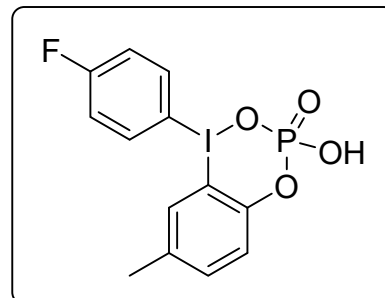

$^1\text{H}$  NMR (601 MHz, DMSO- $d_6$ +TFA)  $\delta$  8.32 – 8.18 (m, 2H), 7.53 (d,  $J$  = 2.1 Hz, 1H), 7.38 (t,  $J$  = 8.9 Hz, 2H), 7.32 (dd,  $J$  = 8.4, 2.0 Hz, 1H), 7.23 (dd,  $J$  = 8.2, 1.1 Hz, 1H), 2.20 (s, 3H).  $^{13}\text{C}$  NMR (151 MHz, DMSO- $d_6$ +TFA)  $\delta$  164.7, 163.0, 149.9 (d,  $J$  = 6.8 Hz), 138.8 (d,  $J$  = 8.7 Hz), 135.2, 133.9, 133.6, 122.6, 118.8 (d,  $J$  = 22.5 Hz), 111.9, 20.0.  $^{19}\text{F}$  NMR (565 MHz, DMSO- $d_6$ +TFA)  $\delta$  -107.11 (s). HRMS(ESI):  $m/z$  [M+Na] $^+$  calculated for C<sub>13</sub>H<sub>11</sub>FINaO<sub>4</sub>P $^+$ : 430.9316; found 430.9313. IR (ATR)  $\tilde{\nu}$  = 2926, 2358, 1653, 1576, 1482, 1399, 1232, 1161, 942, 901, 825. Mp = 122-124  $^\circ\text{C}$  (decomp.).

### 3-Hydroxy-7-methyl-1-(naphthalen-1-yl)-1*H*-1 $\lambda^3$ -benzo[*e*][1,2,4,3]iodadioxaphosphinine 3-oxide (**9r**)

Following GP3, the reaction of **8a** (165 mg, 500  $\mu$ mol) with trimethyl(naphthalen-1-yl)silane (152  $\mu$ L, 750  $\mu$ mol, 1.50 eq.) in MeCN/TFA (1:1, 5 mL) gave the product **9r** (155 mg, 351  $\mu$ mol, 70%) as a colourless solid.

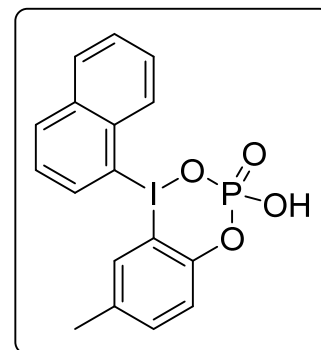

$^1\text{H}$  NMR (601 MHz, DMSO- $d_6$  + TFA)  $\delta$  8.71 (d,  $J$  = 7.4 Hz, 1H), 8.27 (dd,  $J$  = 8.4, 4.6 Hz, 2H), 8.11 (s, 1H), 8.04 (d,  $J$  = 8.1 Hz, 1H), 7.78 (t,  $J$  = 7.7 Hz, 1H), 7.70 (t,  $J$  = 7.6 Hz, 1H), 7.61 (t,  $J$  = 7.8 Hz, 1H), 7.42 (d,  $J$  = 8.4 Hz, 1H), 7.39 – 7.34 (m, 1H), 2.21 (s, 3H).  $^{13}\text{C}$  NMR (151 MHz, DMSO- $d_6$  + TFA)  $\delta$  148.5 (d,  $J$  = 4.9 Hz), 137.9, 136.4, 136.0, 134.6, 134.2, 133.5, 131.1, 129.8, 129.4, 129.1, 128.0, 127.5, 120.2, 118.9, 109.2 (d,  $J$  = 8.3 Hz), 19.8. HRMS(ESI):  $m/z$  [M+Na] $^+$  calculated for C<sub>17</sub>H<sub>14</sub>INaO<sub>4</sub>P $^+$ : 462.9567; found 462.9565. IR (ATR)  $\tilde{\nu}$  = 2926, 2359, 1683, 1484, 1249, 1172, 1121, 893. Mp = 146-148  $^\circ\text{C}$  (decomp.).

## 4.4. Syntheses of Diaryl Ethers

### 2-(2-Iodo-4-methylphenoxy)-1,3,5-trimethylbenzene (10a)

Method in MeCN with Cs<sub>2</sub>CO<sub>3</sub>:

A suspension of **9a** (21.6 mg, 50.0 μmol, 1.00 eq.) and Cs<sub>2</sub>CO<sub>3</sub> (17.9 mg, 55.0 μmol, 1.10 eq.) in MeCN (1 mL) was stirred for 24 h at 80 °C. After cooling to room temperature EtOAc (10 mL) was

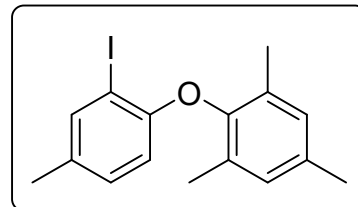

added, the phases were separated, and the aqueous phase was extracted with EtOAc (3 x 10 mL). The combined organic phases were dried over Na<sub>2</sub>SO<sub>4</sub>, filtrated, and concentrated under reduced pressure. The product **10a** (17.2 mg, 48.8 μmol, 98%) was obtained as a colourless solid.

Method in H<sub>2</sub>O with Ca(OH)<sub>2</sub>:

Following GP5, the reaction of **9b** (43.2 mg) gave after a reaction time of 24 h and column chromatography (cyclohexane) the product **101** (28.4 mg, 80.6 μmol, 81%) as a colourless solid.

<sup>1</sup>H NMR (601 MHz, CDCl<sub>3</sub>) δ 7.66 (dd, *J* = 2.0, 0.9 Hz, 1H), 6.92 – 6.88 (m, 3H), 6.19 (d, *J* = 8.3 Hz, 1H), 2.30 (s, 3H), 2.25 (s, 3H), 2.08 (s, 6H). <sup>13</sup>C NMR (151 MHz, CDCl<sub>3</sub>) δ 154.5, 149.4, 140.1, 134.8, 132.6, 130.9, 130.0, 129.7, 112.6, 84.9, 20.9, 20.1, 16.4. HRMS(ESI): *m/z* [M+Na]<sup>+</sup> calculated for C<sub>16</sub>H<sub>17</sub>INaO<sup>+</sup>: 375.0216; found 375.0212. IR (ATR)  $\tilde{\nu}$  = 3032, 2948, 2916, 2853, 1472, 1225, 1210, 1145, 1035, 855, 804. Mp = 68-71 °C.

### 2-(2-Iodophenoxy)-1,3,5-trimethylbenzene (10b)

Following GP5, the reaction of **9b** (41.8 mg) gave after a reaction time of 24 h and column chromatography (cyclohexane) the product **10b** (26.2 mg, 78.7 μmol, 79%) as a colourless solid.

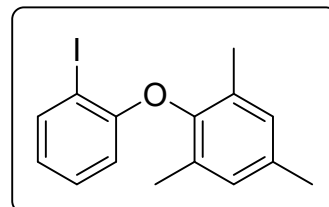

<sup>1</sup>H NMR (601 MHz, CDCl<sub>3</sub>) δ 7.84 (dd, *J* = 7.8, 1.6 Hz, 1H), 7.15 – 7.09 (m, 1H), 6.91 (s, 2H), 6.72 (td, *J* = 7.6, 1.4 Hz, 1H), 6.31 (dd, *J* = 8.3, 1.4 Hz, 1H), 2.31 (s, 3H), 2.08 (s, 6H). <sup>13</sup>C NMR (151 MHz, CDCl<sub>3</sub>) δ 156.6, 149.2, 139.8, 135.0, 130.9, 129.7, 129.5, 123.1, 113.0, 85.2, 21.0, 16.4. MS(ESI): *m/z* = 339.0 [M+H]<sup>+</sup>. IR (ATR)  $\tilde{\nu}$  = 2918, 2853, 2359, 1580, 1462, 1435, 1228, 1221, 1141, 1017, 859, 738. Mp = 68-70 °C. The analytical data is in accordance with literature data. <sup>8</sup>



### 2-(4-(*tert*-Butyl)-2-iodophenoxy)-1,3,5-trimethylbenzene (10c)

Following GP5, the reaction of **9c** (47.4 mg) gave after a reaction time of 48 h and column chromatography (cyclohexane) the product **10c** (28.7 mg, 72.8  $\mu\text{mol}$ , 73%) as a colourless oil.

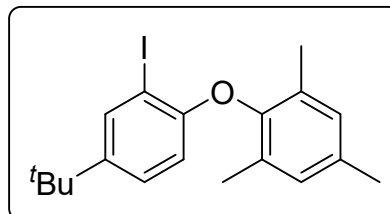

$^1\text{H}$  NMR (601 MHz,  $\text{CDCl}_3$ )  $\delta$  7.81 (d,  $J = 2.3$  Hz, 1H), 7.11 (dd,  $J = 8.7, 2.3$  Hz, 1H), 6.90 (s, 2H), 6.21 (d,  $J = 8.6$  Hz, 1H), 2.30 (s, 3H), 2.08 (s, 6H), 1.27 (s, 9H).  $^{13}\text{C}$  NMR (151 MHz,  $\text{CDCl}_3$ )  $\delta$  154.3, 149.5, 146.1, 136.7, 134.8, 131.0, 129.7, 126.4, 112.4, 84.9, 34.2, 31.6, 21.0, 16.5. HRMS(EI):  $m/z$   $[\text{M}]^+$  calculated for  $\text{C}_{19}\text{H}_{23}\text{IO}^+$ : 394.0794; found 394.0791. IR (ATR)  $\tilde{\nu}$  3006, 2959, 2920, 2860, 2734, 1476, 1280, 1034.

### 3-Iodo-4-(mesityloxy)-1,1'-biphenyl (10d)

Following GP5, the reaction of **9d** (49.4 mg) gave after a reaction time of 24 h and column chromatography (cyclohexane) the product **10d** (28.8 mg, 69.5  $\mu\text{mol}$ , 70%) as a colourless oil.

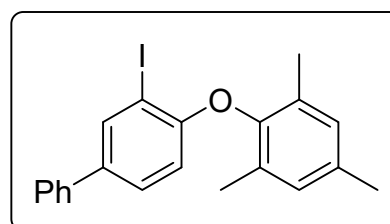

$^1\text{H}$  NMR (600 MHz,  $\text{CDCl}_3$ )  $\delta$  8.08 (d,  $J = 2.2$  Hz, 1H), 7.54 – 7.49 (m, 2H), 7.42 (t,  $J = 7.8$  Hz, 2H), 7.36 – 7.30 (m, 2H), 6.94 (s, 2H), 6.37 (d,  $J = 8.5$  Hz, 1H), 2.32 (s, 3H), 2.12 (s, 6H).  $^{13}\text{C}$  NMR (151 MHz,  $\text{CDCl}_3$ )  $\delta$  156.1, 149.3, 139.5, 138.4, 136.5, 135.1, 130.9, 129.8, 129.0, 128.2, 127.3, 126.9, 113.1, 85.5, 21.0, 16.4. HRMS(ESI):  $m/z$   $[\text{M}+\text{Na}]^+$  calculated for  $\text{C}_{21}\text{H}_{19}\text{I}\text{NaO}^+$ : 437.0373; found 437.0372. IR (ATR)  $\tilde{\nu} = 3027, 2918, 2853, 1592, 1465, 1233, 1199, 1034, 1015, 854, 755$ .

### 2-(4-Chloro-2-iodophenoxy)-1,3,5-trimethylbenzene (10e)

Following GP5, the reaction of **9e** (45.3 mg) gave after a reaction time of 24 h and column chromatography (cyclohexane) the product **10e** (28.7 mg, 77.0  $\mu\text{mol}$ , 77%) as a colourless solid.

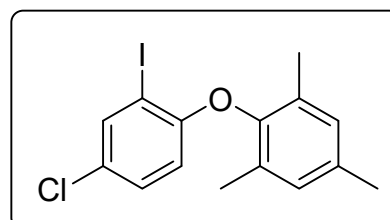

$^1\text{H}$  NMR (600 MHz,  $\text{CDCl}_3$ )  $\delta$  7.81 (d,  $J = 2.4$  Hz, 1H), 7.09 (dd,  $J = 8.8, 2.5$  Hz, 1H), 6.91 (s, 2H), 6.22 (d,  $J = 8.8$  Hz, 1H), 2.30 (s, 3H), 2.06 (s, 6H).  $^{13}\text{C}$  NMR (151 MHz,  $\text{CDCl}_3$ )  $\delta$  155.6, 149.1, 138.9, 135.3, 130.7, 129.9, 129.4, 127.0, 113.4, 85.2, 20.9, 16.3. HRMS(ESI):  $m/z$

$[M+Na]^+$  calculated for  $C_{15}H_{14}ClINaO^+$ : 394.9670; found 394.9662. IR (ATR)  $\tilde{\nu}$  = 2951, 2914, 2851, 2360, 2342, 1458, 1270, 1232, 1194, 1031, 816. Mp = 77-78 °C.

### 2-(2-Iodo-4-(trifluoromethyl)phenoxy)-1,3,5-trimethylbenzene (10f)

Following GP5, the reaction of **9f** (48.6 mg) gave after a reaction time of 24 h and column chromatography (cyclohexane) the product **10f** (20.6 mg, 50.7  $\mu$ mol, 51%) as a colourless oil.

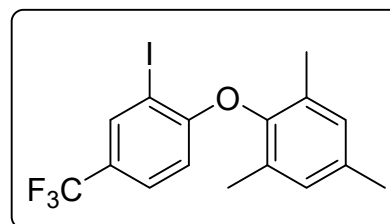

$^1H$  NMR (601 MHz,  $CDCl_3$ )  $\delta$  8.09 (s, 1H), 7.39 (dd,  $J$  = 8.6, 2.2 Hz, 1H), 6.93 (s, 2H), 6.36 (d,  $J$  = 8.6 Hz, 1H), 2.31 (s, 3H), 2.06 (s, 6H).  $^{13}C$  NMR (151 MHz,  $CDCl_3$ )  $\delta$  159.2, 148.8, 137.1 (d,  $J$  = 3.8 Hz), 135.6, 130.6, 130.0, 127.0 (d,  $J$  = 3.8 Hz), 125.3 (q,  $J$  = 33.2 Hz), 123.3 (q,  $J$  = 271.9 Hz), 112.6, 84.8, 21.0, 16.3.  $^{19}F$  NMR (565 MHz,  $CDCl_3$ )  $\delta$  -61.67 (s). HRMS(EI):  $m/z$   $[M]^+$  calculated for  $C_{16}H_{14}F_3IO^+$ : 406.0041; found 406.0034. IR (ATR)  $\tilde{\nu}$  = 2951, 2919, 2859, 2360, 2342, 1601, 1478, 1316, 1120, 1036, 824.

### 2-(5-Bromo-2-iodophenoxy)-1,3,5-trimethylbenzene (10g)

Following GP5, the reaction of **9g** (49.7 mg) gave after a reaction time of 24 h and column chromatography (cyclohexane) the product **10g** (29.0 mg, 69.5  $\mu$ mol, 70%) as a colourless solid.

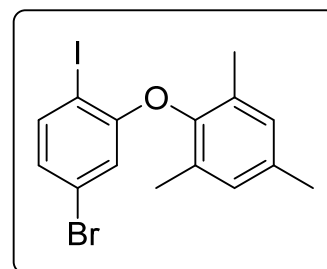

$^1H$  NMR (600 MHz,  $CDCl_3$ )  $\delta$  7.67 (d,  $J$  = 8.3 Hz, 1H), 6.92 (s, 2H), 6.88 (dd,  $J$  = 8.3, 2.2 Hz, 1H), 6.41 (d,  $J$  = 2.1 Hz, 1H), 2.31 (s, 3H), 2.07 (s, 6H).  $^{13}C$  NMR (151 MHz,  $CDCl_3$ )  $\delta$  157.4, 148.8, 140.6, 135.4, 130.6, 130.0, 126.4, 123.1, 116.2, 83.5, 21.0, 16.3. HRMS(EI):  $m/z$   $[M]^+$  calculated for  $C_{15}H_{14}BrIO^+$ : 415.9273; found 415.9266. IR (ATR)  $\tilde{\nu}$  = 2914, 2859, 2360, 2342, 1587, 1464, 1386, 1306, 1218, 813, 700. Mp = 84-86 °C.

### 2-(2-bromo-6-iodophenoxy)-1,3,5-trimethylbenzene (10h)

Following GP5, the reaction of **9h** (49.7 mg) gave after a reaction time of 24 h and column chromatography (cyclohexane) the product **10h** (20.2 mg, 50.8  $\mu$ mol, 51%) as a colourless solid.

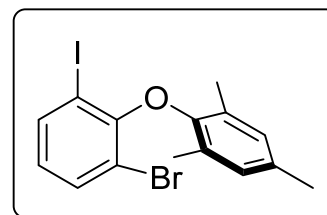

$^1H$  NMR (600 MHz,  $CDCl_3$ )  $\delta$  7.78 (dd,  $J$  = 7.8, 1.6 Hz, 1H), 7.49 (dd,  $J$  = 8.0, 1.5 Hz, 1H), 6.80 (s, 2H), 6.66 (t,  $J$  = 7.9 Hz, 1H), 2.26 (s, 3H), 2.04 (s, 6H).  $^{13}C$  NMR (151 MHz,  $CDCl_3$ )  $\delta$  153.6, 150.7, 139.5, 134.7, 133.1, 130.0, 128.4, 125.5, 113.1, 90.1,

20.7, 17.9. HRMS(ESI):  $m/z$   $[M+Na]^+$  calculated for  $C_{15}H_{14}IO^+$ : 438.9165; found 438.9160. IR (ATR)  $\tilde{\nu}$  = 2951, 2920, 2852, 2360, 2342, 1464, 1418, 1225, 1134, 857, 755. Mp = 97-99 °C.

### 2-Iodo-4-methyl-1-phenoxybenzene (10i)

Following GP5, the reaction of **9k** (39.0 mg) gave after a reaction time of 24 h and column chromatography (cyclohexane) the product **10i** (28.3 mg, 91.3  $\mu$ mol, 91%) as a colourless oil.

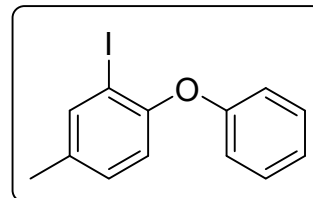

$^1H$  NMR (600 MHz,  $CDCl_3$ )  $\delta$  7.69 (s, 1H), 7.32 (t,  $J$  = 7.9 Hz, 2H), 7.12 – 7.06 (m, 2H), 6.94 (d,  $J$  = 8.0 Hz, 2H), 6.83 (d,  $J$  = 8.2 Hz, 1H), 2.32 (s, 3H).  $^{13}C$  NMR (151 MHz,  $CDCl_3$ )  $\delta$  157.5, 154.2, 140.2, 135.6, 130.5, 129.9, 123.2, 119.9, 118.0, 89.3, 20.4. MS(ESI):  $m/z$  = 311.0  $[M+H]^+$ . IR (ATR)  $\tilde{\nu}$  = 3038, 2920, 2852, 2360, 1587, 1475, 1236, 1198, 1037, 744, 688. The analytical data is in accordance with literature data.<sup>8</sup>

### 2-Iodo-4-methyl-1-(*p*-tolylloxy)benzene (10j)

Following GP5, the reaction of **9l** (40.4 mg) gave after a reaction time of 24 h and column chromatography (cyclohexane) the product **10j** (21.2 mg, 65.4  $\mu$ mol, 65%) as a colourless oil.

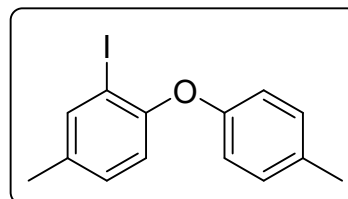

$^1H$  NMR (600 MHz,  $CDCl_3$ )  $\delta$  7.68 (d,  $J$  = 2.1 Hz, 1H), 7.12 (d,  $J$  = 8.0 Hz, 2H), 7.09 – 7.05 (m, 1H), 6.85 (d,  $J$  = 8.1 Hz, 2H), 6.78 (d,  $J$  = 8.3 Hz, 1H), 2.33 (s, 3H), 2.31 (s, 3H).  $^{13}C$  NMR (151 MHz,  $CDCl_3$ )  $\delta$  155.2, 154.6, 140.1, 135.2, 132.8, 130.4, 130.3, 119.3, 118.1, 88.9, 20.8, 20.3. MS(ESI):  $m/z$  = 325.3  $[M+H]^+$ . IR (ATR)  $\tilde{\nu}$  = 3027, 2919, 2861, 2733, 2361, 1505, 1476, 1237, 1199, 1036, 808. The analytical data is in accordance with literature data.<sup>9</sup>

### 1-(4-(Tert-butyl)phenoxy)-2-iodo-4-methylbenzene (10k)

Following GP5, the reaction of **9m** (44.6 mg) gave after a reaction time of 24 h and column chromatography (cyclohexane) the product **10k** (20.0 mg, 54.6  $\mu$ mol, 55%) as a colourless solid.

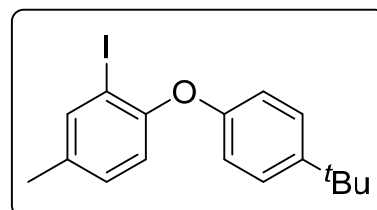

$^1H$  NMR (600 MHz,  $CDCl_3$ )  $\delta$  7.68 (s, 1H), 7.37 – 7.28 (m, 2H), 7.11 – 7.03 (m, 1H), 6.88 (d,  $J$  = 8.7 Hz, 2H), 6.80 (d,  $J$  = 8.2 Hz, 1H), 2.31 (s, 3H), 1.32 (s, 9H).  $^{13}C$  NMR (151 MHz,  $CDCl_3$ )  $\delta$  154.9, 154.5, 146.0, 140.0, 135.1, 130.3, 126.5, 119.3, 117.5, 88.8, 34.3, 31.5, 20.2.

HRMS(ESI):  $m/z$   $[M+Na]^+$  calculated for  $C_{17}H_{19}INaO^+$ : 389.0373; found 389.0364. IR (ATR)  $\tilde{\nu}$  = 2958, 2934, 2855, 2360, 1896, 1591, 1478, 1238, 1104, 1035, 813. Mp = 83-85 °C.

### 2-Iodo-1-(4-methoxyphenoxy)-4-methylbenzene (10l)

Following GP5, the reaction of **9n** (42.0 mg) gave after a reaction time of 24 h and column chromatography (cyclohexane/EtOAc 100:1) the product **10l** (4.7 mg, 14  $\mu$ mol, 14%) as a colourless oil.

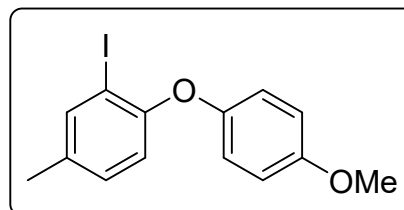

$^1H$  NMR (600 MHz,  $CDCl_3$ )  $\delta$  7.72 – 7.61 (m, 1H), 7.04 (d,  $J$  = 8.4 Hz, 1H), 6.92 (d,  $J$  = 9.1 Hz, 2H), 6.86 (d,  $J$  = 9.1 Hz, 2H), 6.69 (d,  $J$  = 8.3 Hz, 1H), 3.79 (s, 3H), 2.29 (s, 3H).  $^{13}C$  NMR (151 MHz,  $CDCl_3$ )  $\delta$  155.9, 155.4, 150.8, 140.1, 134.8, 130.3, 120.0, 118.3, 115.0, 88.2, 55.8, 20.3. HRMS(ESI):  $m/z$   $[M+Na]^+$  calculated for  $C_{14}H_{13}INaO_2^+$ : 362.9853; found 362.9845. IR (ATR)  $\tilde{\nu}$  = 2922, 2852, 2833, 2360, 1502, 1476, 1226, 1195, 1035, 828.

### 1-(4-Chlorophenoxy)-2-iodo-4-methylbenzene (10m)

Following GP5, the reaction of **9o** (42.5 mg) gave after a reaction time of 24 h and column chromatography (cyclohexane) the product **10m** (32.3 mg, 93.7  $\mu$ mol, 94%) as a colourless oil.

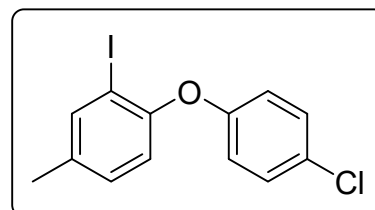

$^1H$  NMR (600 MHz,  $CDCl_3$ )  $\delta$  7.69 (s, 1H), 7.29 – 7.24 (m, 2H), 7.14 – 7.09 (m, 1H), 6.88 – 6.81 (m, 3H), 2.32 (s, 3H).  $^{13}C$  NMR (151 MHz,  $CDCl_3$ )  $\delta$  156.2, 153.7, 140.4, 136.2, 130.6, 129.8, 128.1, 120.2, 119.0, 89.3, 20.4. HRMS(ESI):  $m/z$   $[M+Na]^+$  calculated for  $C_{13}H_{10}ClINaO^+$ : 366.9357; found 366.9350. IR (ATR)  $\tilde{\nu}$  = 3023, 2920, 2853, 2361, 1585, 1474, 1237, 1089, 884, 820.

### 1-(4-Fluorophenoxy)-2-iodo-4-methylbenzene (10n)

Following GP5, the reaction of **9p** (40.8 mg) gave after a reaction time of 24 h and column chromatography (cyclohexane) the product **10n** (17.0 mg, 51.8  $\mu$ mol, 52%) as a colourless oil.

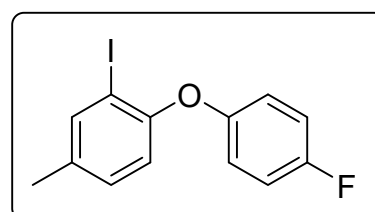

$^1H$  NMR (601 MHz,  $CDCl_3$ )  $\delta$  7.68 (s, 1H), 7.12 – 7.07 (m, 1H), 7.03 – 6.98 (m, 2H), 6.93 – 6.88 (m, 2H), 6.76 (d,  $J$  = 8.2 Hz, 1H), 2.31 (s, 3H).  $^{13}C$  NMR (151 MHz,  $CDCl_3$ )  $\delta$  158.8 (d,  $J$  =

241.3 Hz), 154.5, 153.3 (d,  $J = 2.6$  Hz), 140.3, 135.6, 130.5, 119.5 (d,  $J = 8.2$  Hz), 119.3, 116.4 (d,  $J = 23.4$  Hz), 88.8, 20.3.  $^{19}\text{F}$  NMR (565 MHz,  $\text{CDCl}_3$ )  $\delta$  -120.54 (tt,  $J = 8.3, 4.4$  Hz). HRMS(EI):  $m/z$   $[\text{M}]^+$  calculated for  $\text{C}_{13}\text{H}_{10}\text{OFI}^+$ : 327.9760; found 327.9755. IR (ATR)  $\tilde{\nu} = 2922, 2853, 1499, 1476, 1248, 1217, 1187, 1037$ .

### 2-(2-Iodo-4-methylphenoxy)-1,3,5-trimethoxybenzene (10o)

Following GP5, the reaction of **9i** (48.0 mg) gave after a reaction time of 24 h and column chromatography (DCM/MeOH 10:1) the product **10o** (28.0 mg, 70.0  $\mu\text{mol}$ , 70%) as a brown solid.

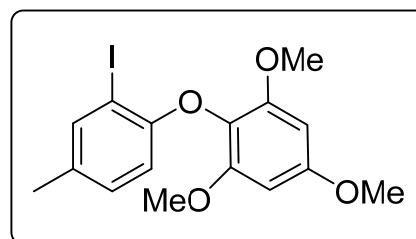

$^1\text{H}$  NMR (601 MHz,  $\text{CDCl}_3$ )  $\delta$  6.97 (dd,  $J = 8.2, 1.4$  Hz, 1H), 6.65 (d,  $J = 8.2$  Hz, 1H), 6.26 – 6.22 (m, 3H), 3.92 (s, 3H), 3.84 (s, 6H), 2.11 (s, 3H).  $^{13}\text{C}$  NMR (151 MHz,  $\text{CDCl}_3$ )  $\delta$  166.5, 161.4, 161.0, 132.7, 124.8, 124.0, 116.3, 116.1, 91.5, 78.1, 56.8, 56.0, 20.7. HRMS(ESI):  $m/z$   $[\text{M}+\text{H}]^+$  calculated for  $\text{C}_{16}\text{H}_{18}\text{IO}_4^+$ : 401.0244; found 401.0240. IR (ATR)  $\tilde{\nu} = 3007, 2939, 2841, 2360, 2342, 1577, 1466, 1341, 1226, 1205, 1118, 808$ . Mp = 113–116  $^\circ\text{C}$ .

### 1-(2-Iodo-4-methylphenoxy)naphthalene (10p)

Following GP5, the reaction of **9r** (44.0 mg) gave after a reaction time of 24 h and column chromatography (cyclohexane/EtOAc 4:1) the product **10p** (34.4 mg, 95.5  $\mu\text{mol}$ , 96%) as a colourless oil.

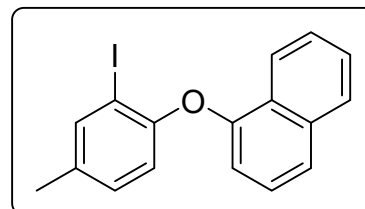

$^1\text{H}$  NMR (601 MHz,  $\text{CDCl}_3$ )  $\delta$  8.33 – 8.23 (m, 1H), 7.92 – 7.84 (m, 1H), 7.78 – 7.71 (m, 1H), 7.61 (d,  $J = 8.2$  Hz, 1H), 7.57 – 7.50 (m, 2H), 7.35 (t,  $J = 7.9$  Hz, 1H), 7.08 (dd,  $J = 8.3, 1.2$  Hz, 1H), 6.84 – 6.75 (m, 2H), 2.33 (s, 3H).  $^{13}\text{C}$  NMR (151 MHz,  $\text{CDCl}_3$ )  $\delta$  154.5, 153.1, 140.3, 135.5, 135.1, 130.5, 127.8, 126.8, 126.4, 126.1, 125.8, 123.2, 122.4, 119.4, 111.9, 88.8, 20.4. HRMS(ESI):  $m/z$   $[\text{M}+\text{Na}]^+$  calculated for  $\text{C}_{17}\text{H}_{13}\text{INaO}^+$ : 382.9903; found 382.9896. IR (ATR)  $\tilde{\nu} = 3051, 2919, 1595, 1574, 1477, 1388, 1258, 1235, 1079, 1043, 766$ .

## 2-(2-Iodo-4-methylphenoxy)thiophene (10q)

Following GP5, the reaction of **9j** (39.6 mg) gave after a reaction time of 24 h and column chromatography (DCM/MeOH 10:1) the product **10q** (19.4 mg, 61.4  $\mu\text{mol}$ , 61%) as a colourless solid.

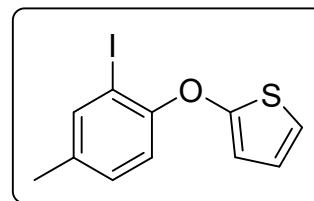

$^1\text{H}$  NMR (600 MHz,  $\text{CDCl}_3$ )  $\delta$  7.67 (dd,  $J = 5.3, 1.1$  Hz, 1H), 7.64 (dd,  $J = 3.7, 1.2$  Hz, 1H), 7.14 (dd,  $J = 5.3, 3.6$  Hz, 1H), 7.03 (dd,  $J = 8.2, 1.9$  Hz, 1H), 6.66 (d,  $J = 8.2$  Hz, 1H), 6.49 (s, 1H), 2.13 (s, 3H).  $^{13}\text{C}$  NMR (151 MHz,  $\text{CDCl}_3$ )  $\delta$  159.8, 140.3, 136.0, 133.7, 129.9, 126.3, 125.3, 121.0, 116.1, 94.9, 20.7. HRMS(ESI):  $m/z$   $[\text{M}+\text{H}]^+$  calculated for  $\text{C}_{11}\text{H}_{10}\text{IOS}^+$ : 316.9492; found 316.9489. IR (ATR)  $\tilde{\nu} = 2915, 2852, 1566, 1455, 1383, 1222, 1197, 1017, 888, 793$ . Mp = 103-105  $^\circ\text{C}$ .

## 5. References

- 1 W. L. F. Armarego, *Purification of Laboratory Chemicals*, Elsevier Science & Technology, Jordan Hill, 6th edn., 2009.
- 2 M. Damrath, L. D. Caspers, D. Duvinage and B. J. Nachtsheim, *Org. Lett.*, 2022, **24**, 2562–2566.
- 3 J. H. Kuhlmann, M. Uygur and O. García Mancheño, *Org. Lett.*, 2022, **24**, 1689–1694.
- 4 M. J. Harper, E. J. Emmett, J. F. Bower and C. A. Russell, *J. Am. Chem. Soc.*, 2017, **139**, 12386–12389.
- 5 H. Bloux, A. Dahiya, A. Hébert, F. Fabis, F. Schoenebeck and T. Cailly, *Chem. Eur. J.*, 2023, **29**, e202203366.
- 6 I. Mosiagin, A. J. Fernandes, A. Budinská, L. Hayriyan, K. E. O. Ylijoki and D. Katayev, *Angew. Chem. Int. Ed.*, 2023, **62**, e202310851.
- 7 J. E. Leffler and H. Jeffe, *J. Org. Chem.*, 1973, **38**, 2719–2721.
- 8 H. Chen, J. Han and L. Wang, *Angew. Chem. Int. Ed.*, 2018, **57**, 12313–12317.
- 9 L. F. Tietze, B. Waldecker, D. Ganapathy, C. Eichhorst, T. Lenzer, K. Oum, S. O. Reichmann and D. Stalke, *Angew. Chem. Int. Ed.*, 2015, **54**, 10317–10321.

## 6. NMR-Spectra

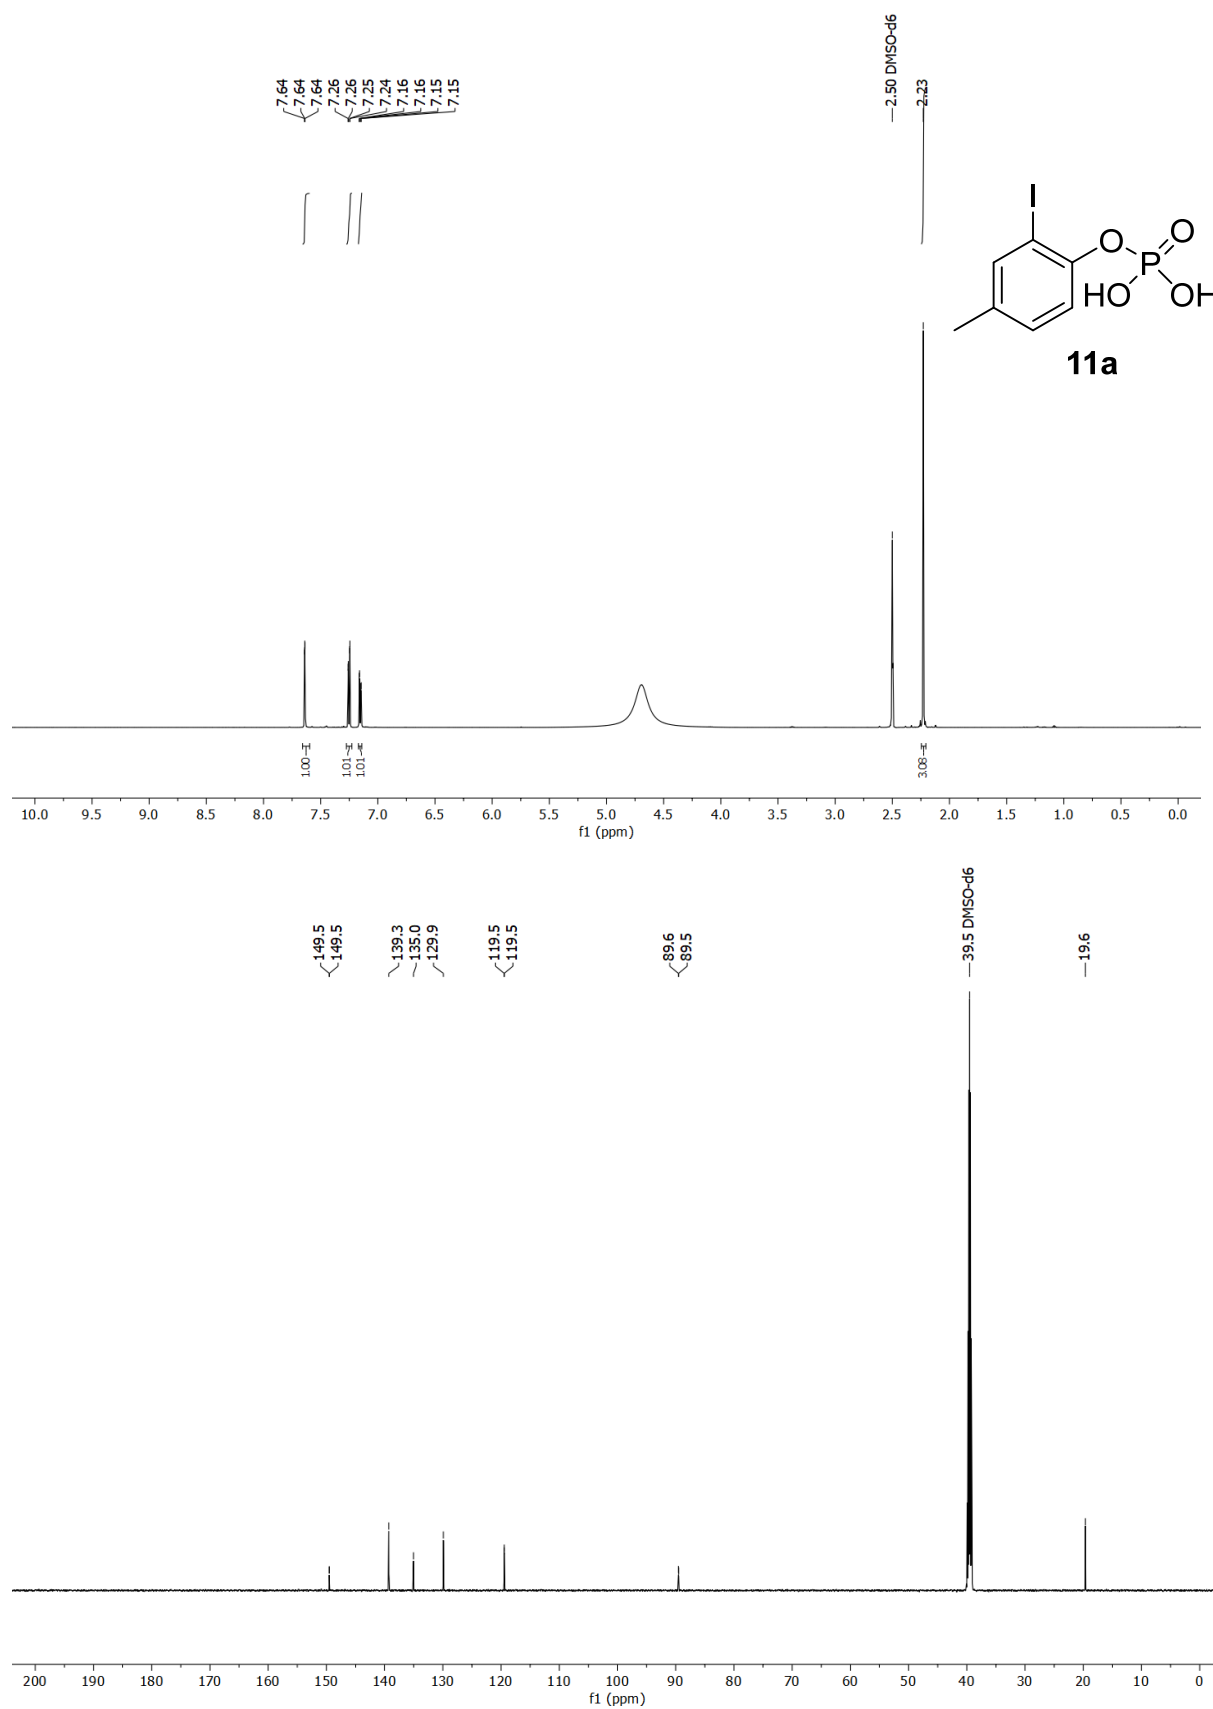

Figure 1: 601 MHz <sup>1</sup>H- and 151 MHz <sup>13</sup>C-NMR-spectra of **11a** in DMSO-*d*<sub>6</sub>.

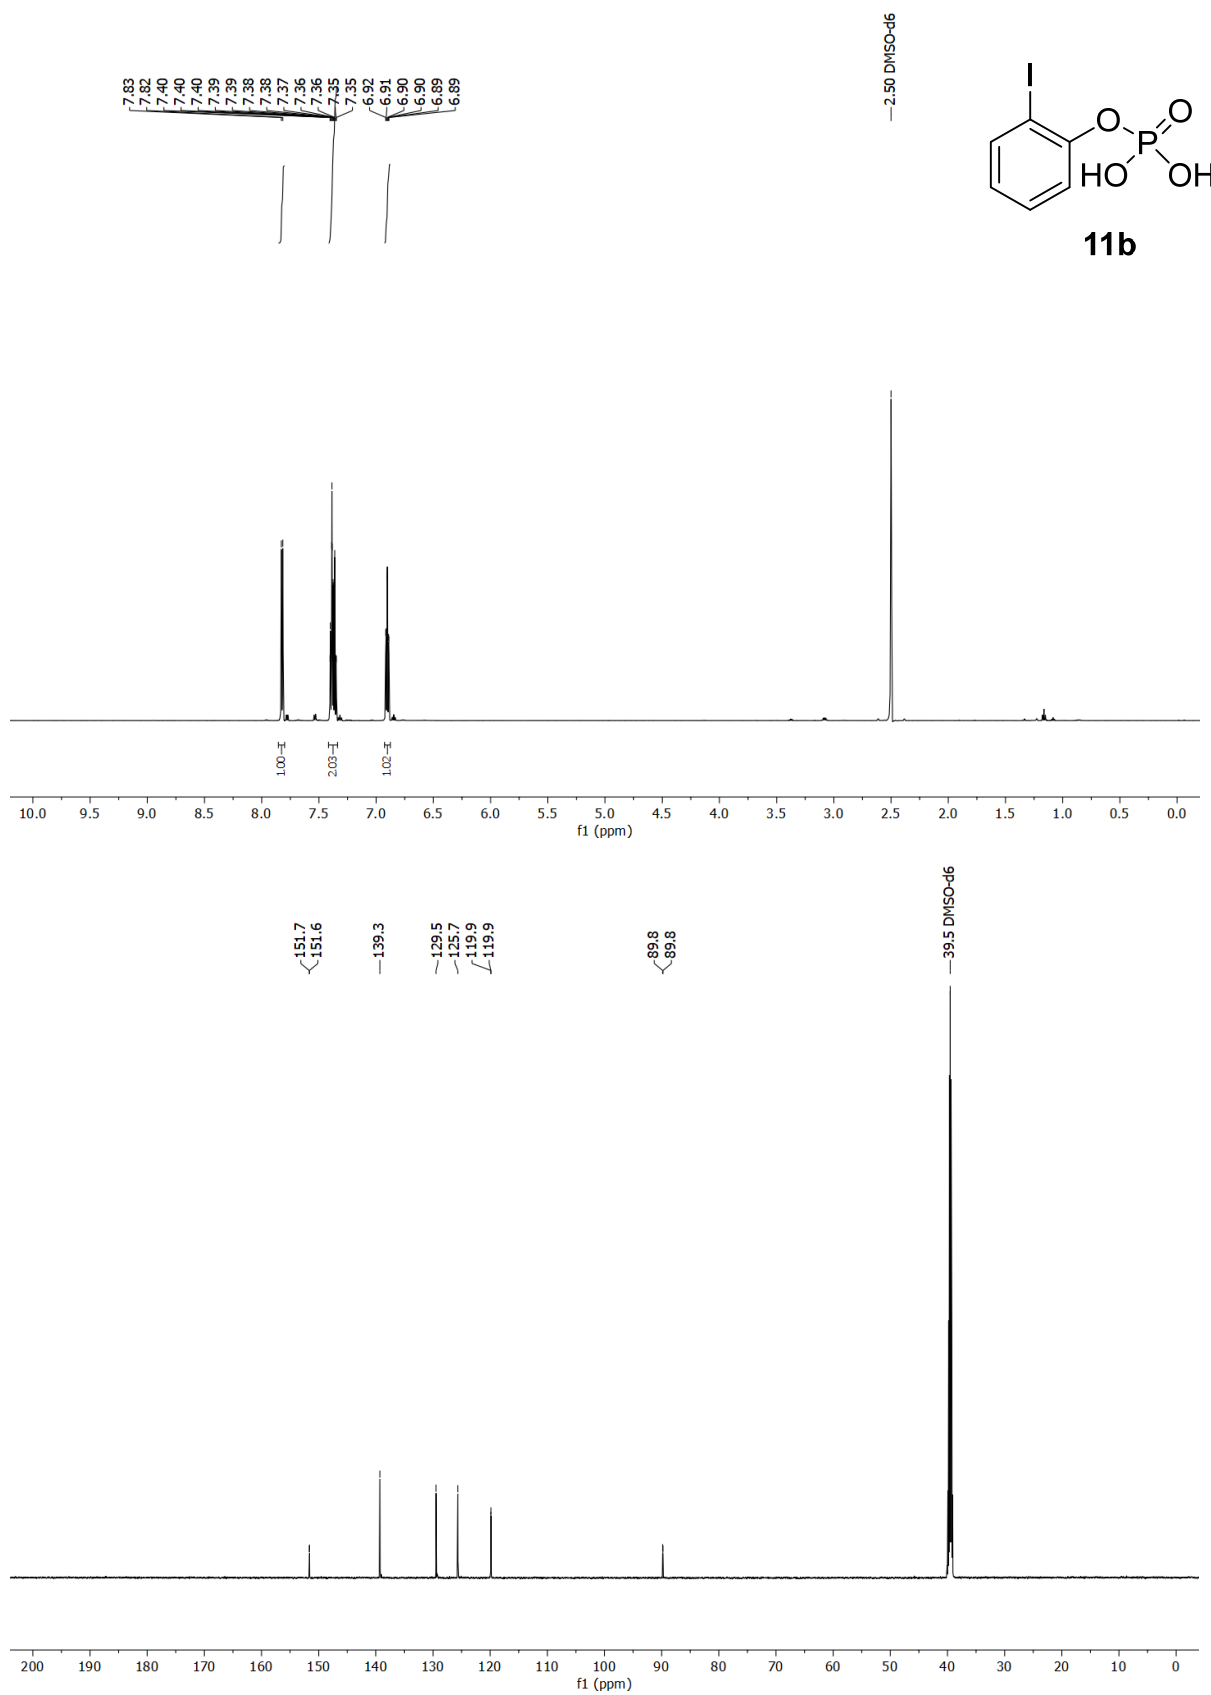

Figure 2: 601 MHz <sup>1</sup>H- and 151 MHz <sup>13</sup>C-NMR-spectrum of **11b** in DMSO-*d*<sub>6</sub>.



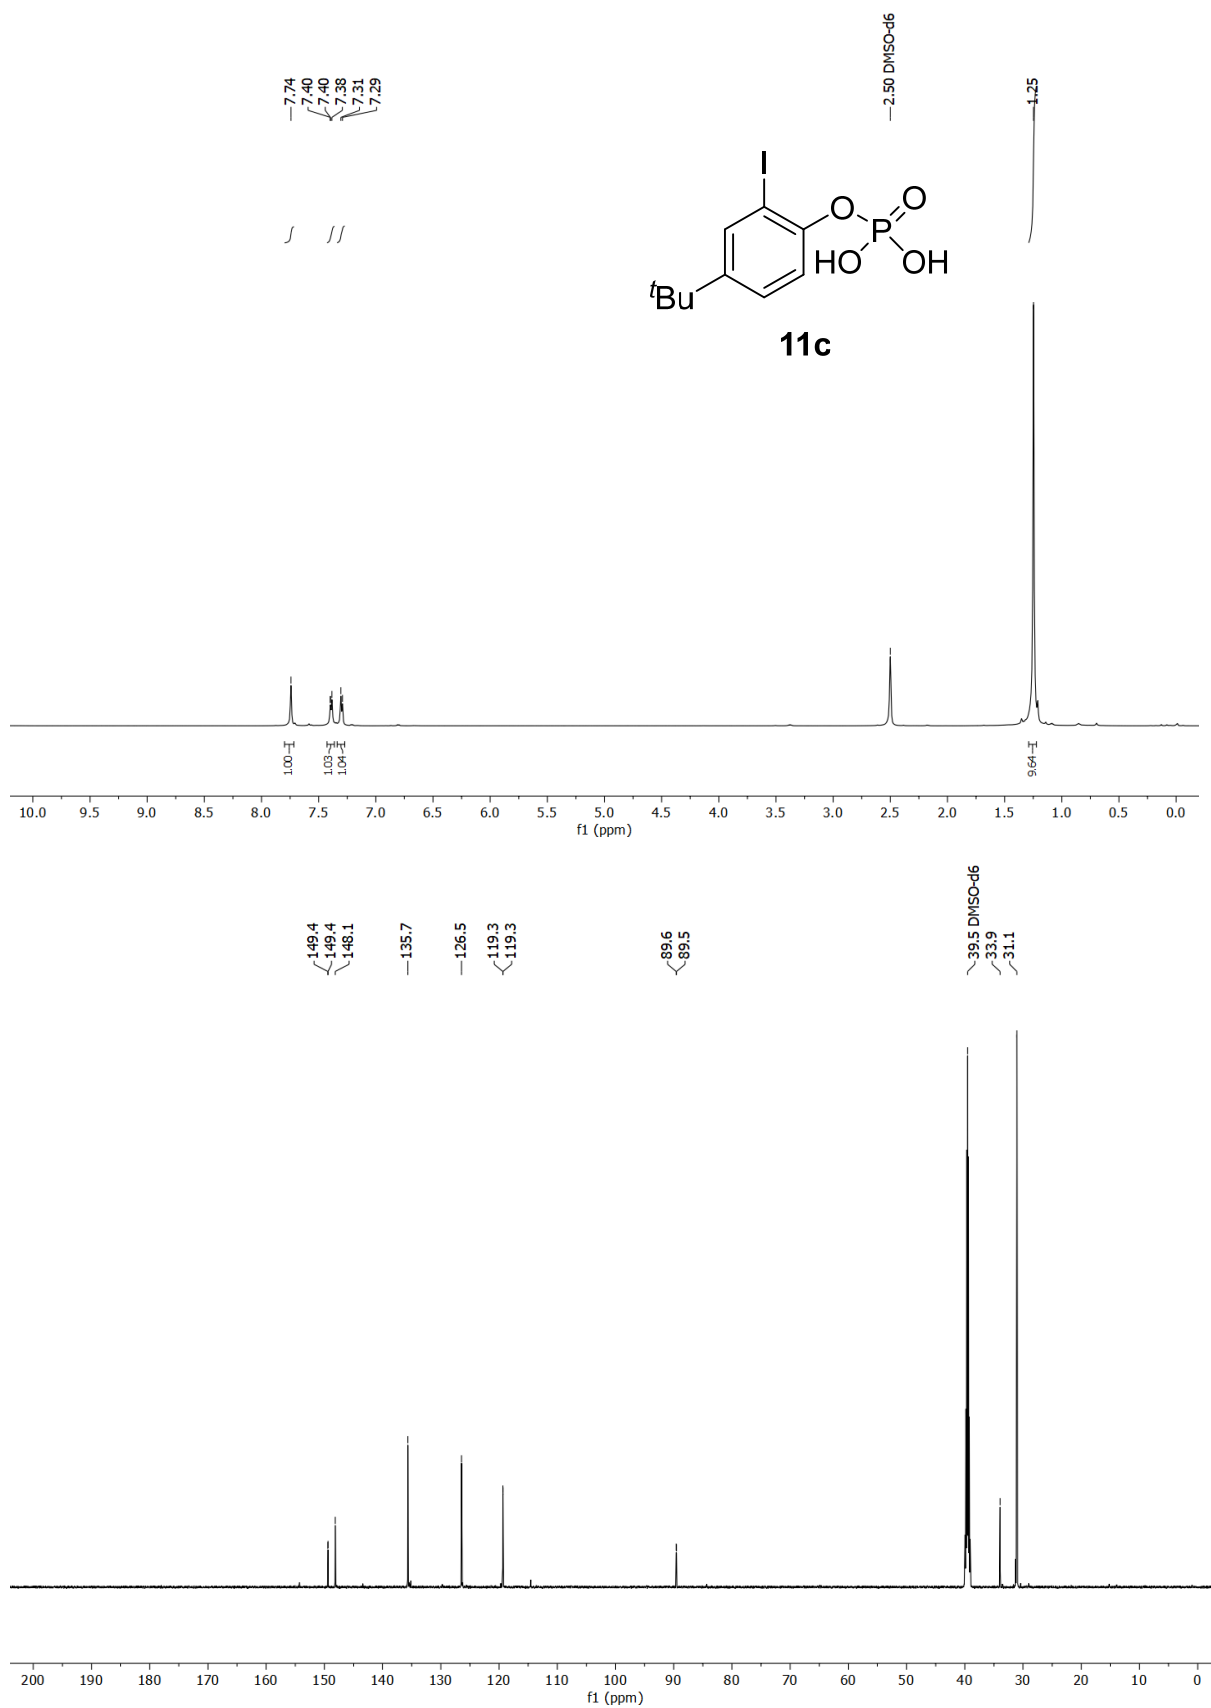

Figure 3: 601 MHz <sup>1</sup>H- and 151 MHz <sup>13</sup>C-NMR-spectra of **11c** in DMSO-*d*<sub>6</sub>.

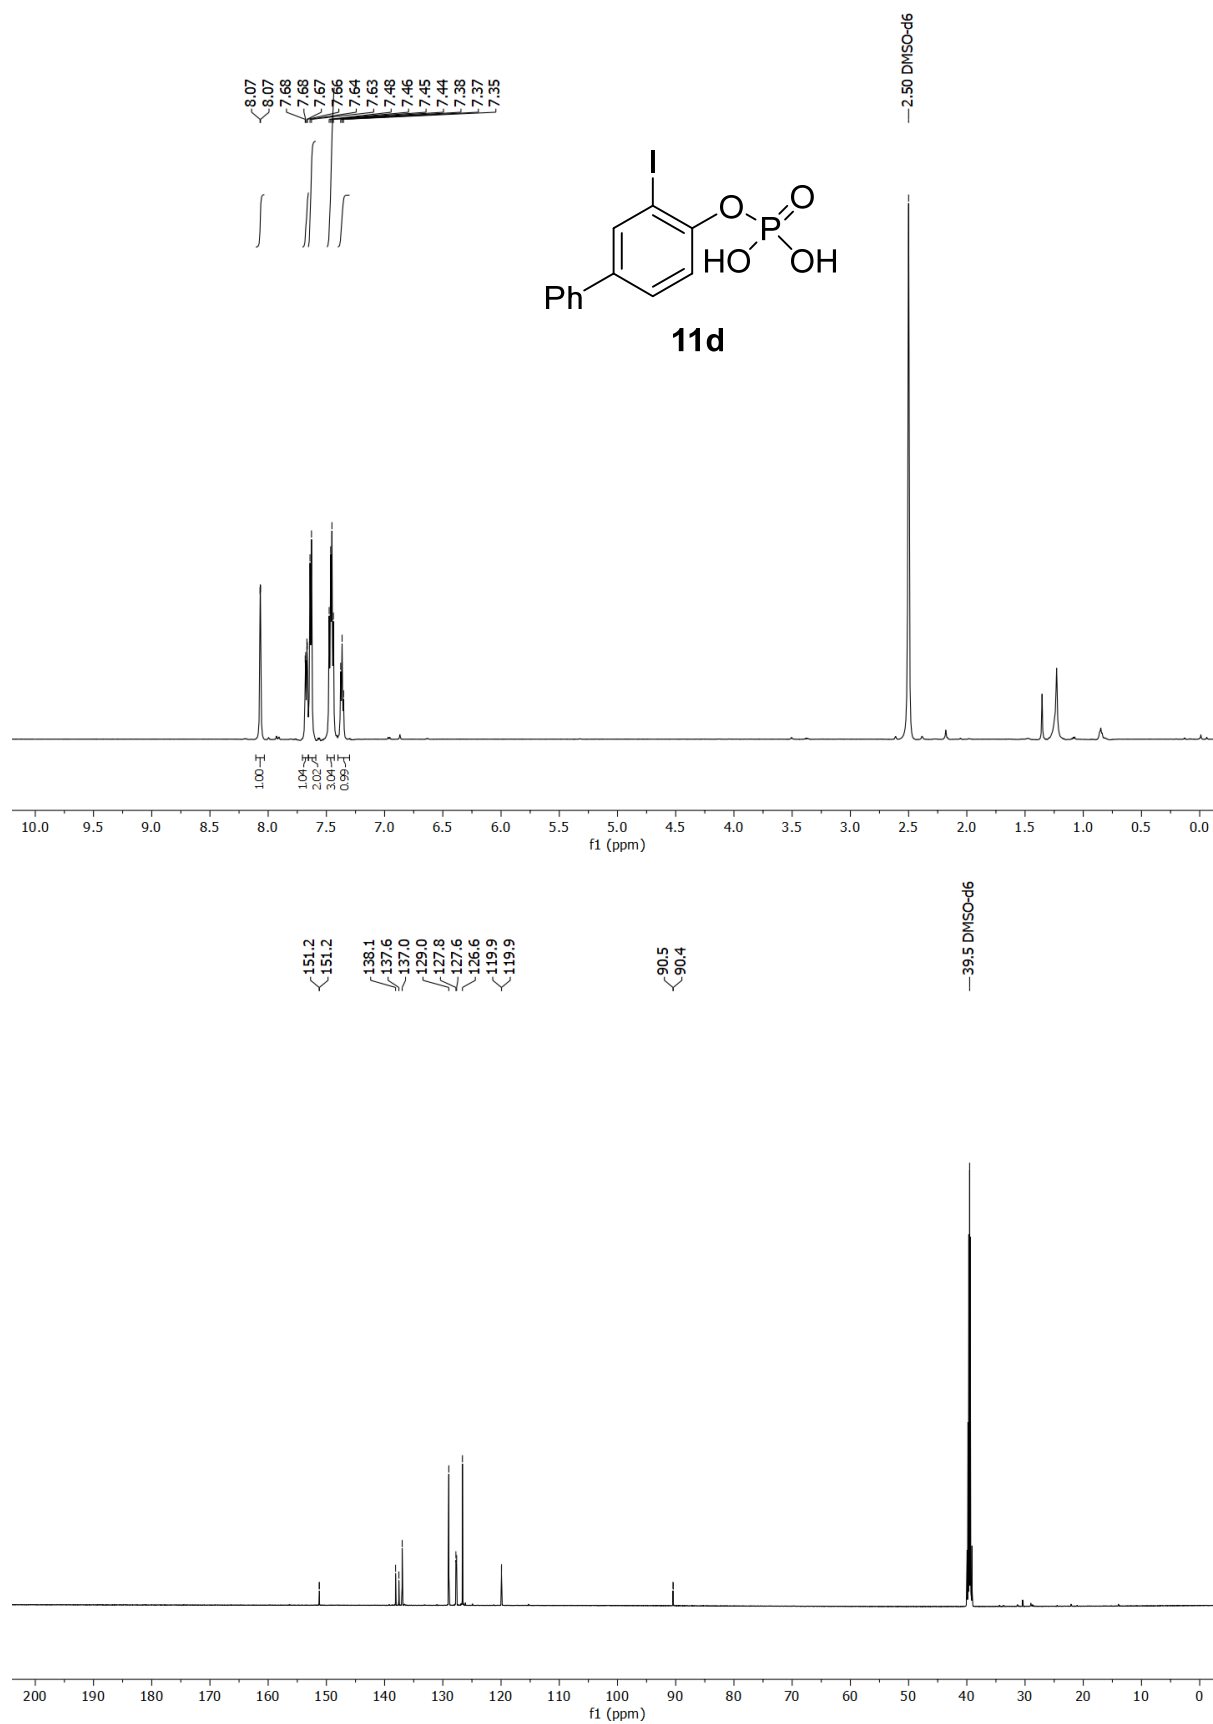

Figure 4: 600 MHz <sup>1</sup>H- and 151 MHz <sup>13</sup>C-NMR-spectrum of **11d** in DMSO-*d*<sub>6</sub>.

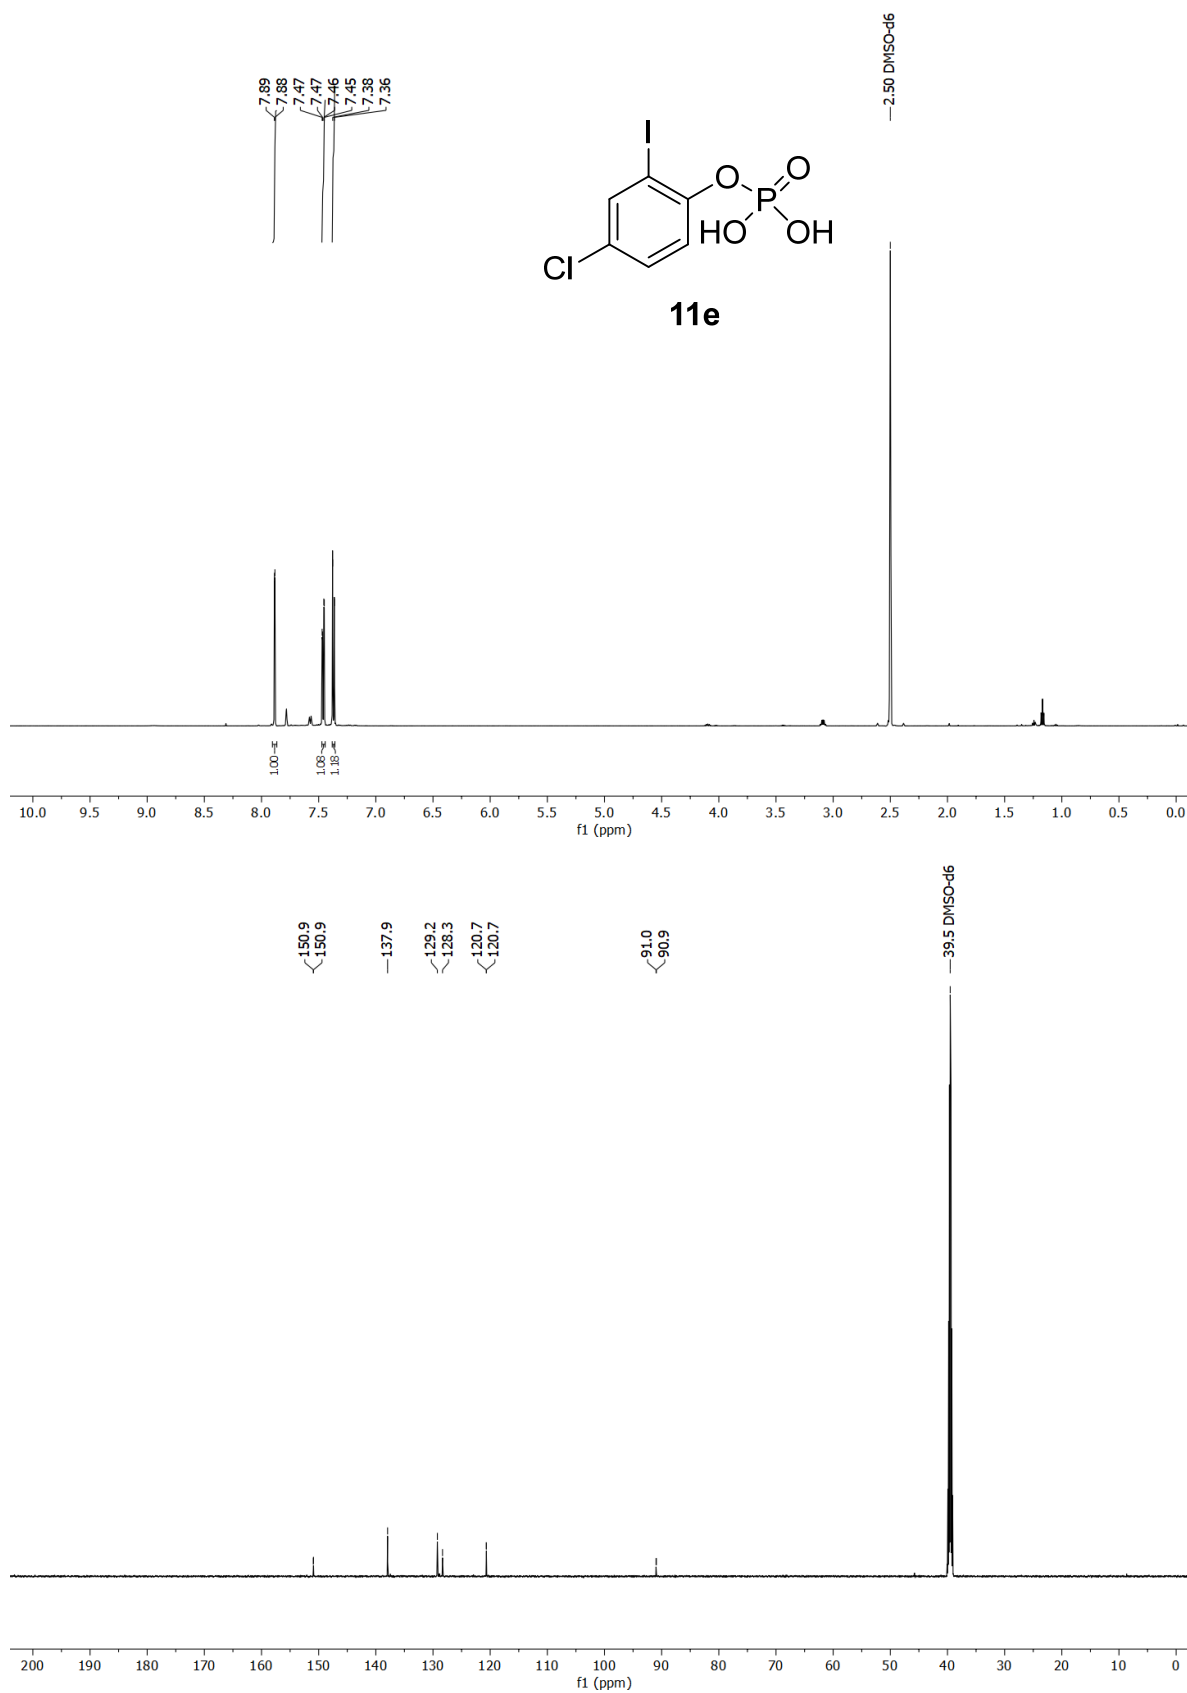

Figure 5: 601 MHz <sup>1</sup>H- and 151 MHz <sup>13</sup>C-NMR-spectrum of **11e** in DMSO-*d*<sub>6</sub>.

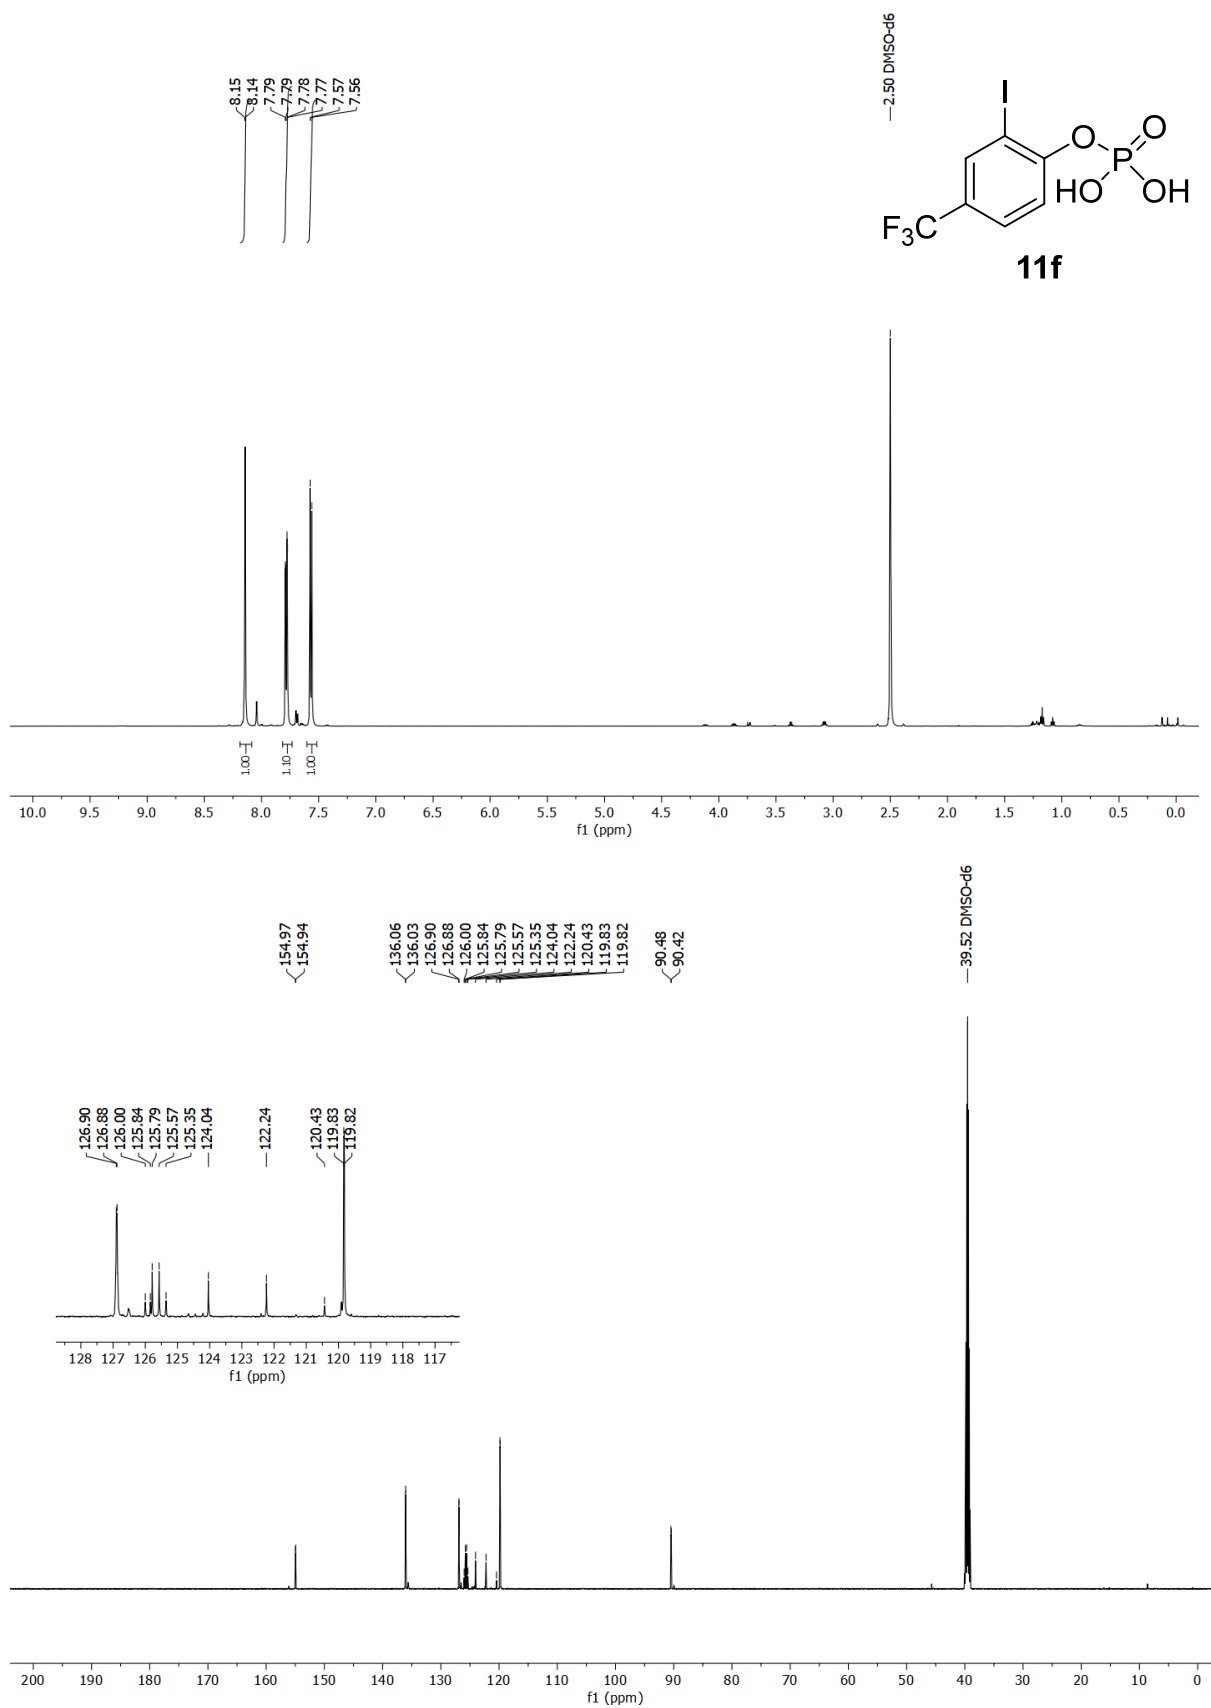

Figure 6: 600 MHz <sup>1</sup>H- and 151 MHz <sup>13</sup>C-NMR-spectrum of **11f** in DMSO-*d*<sub>6</sub>.

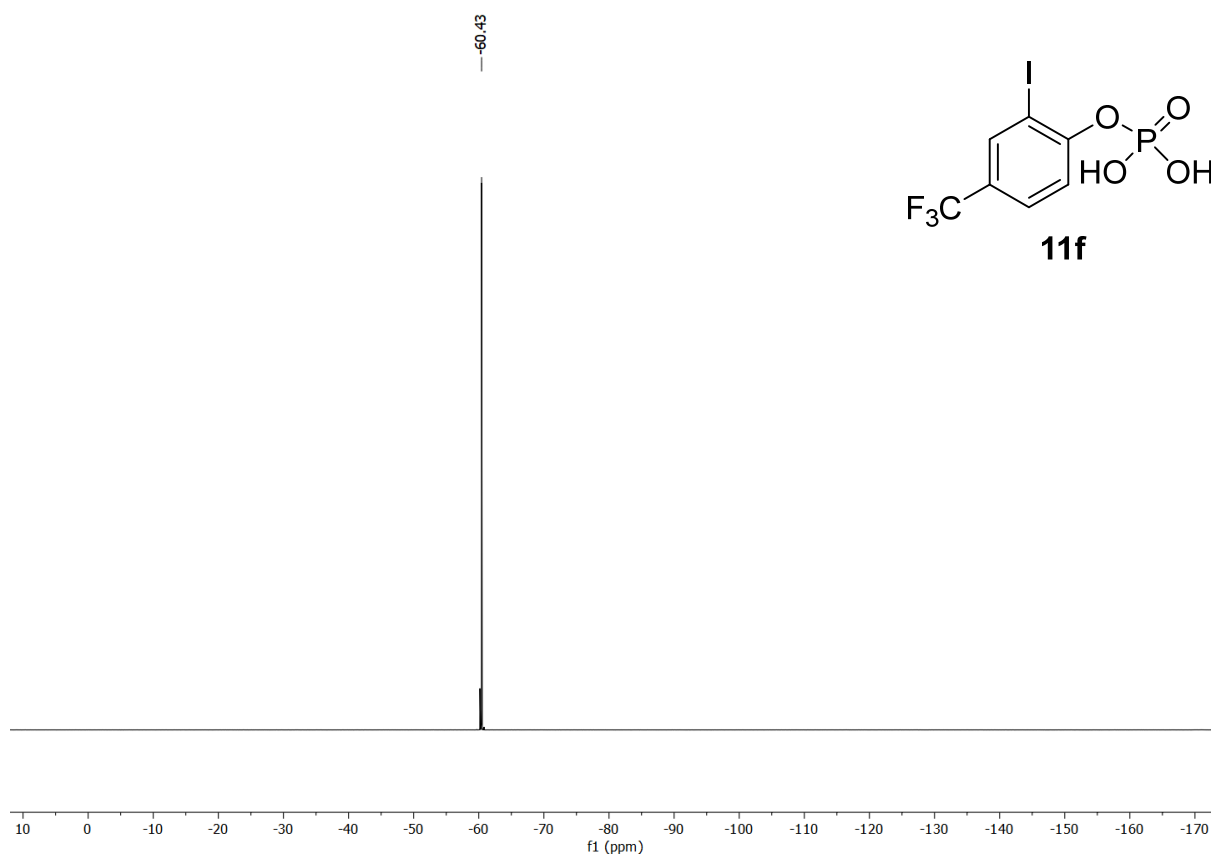

Figure 7: 565 MHz  $^{19}\text{F}$ -NMR-spectrum of **11f** in  $\text{DMSO-}d_6$ .

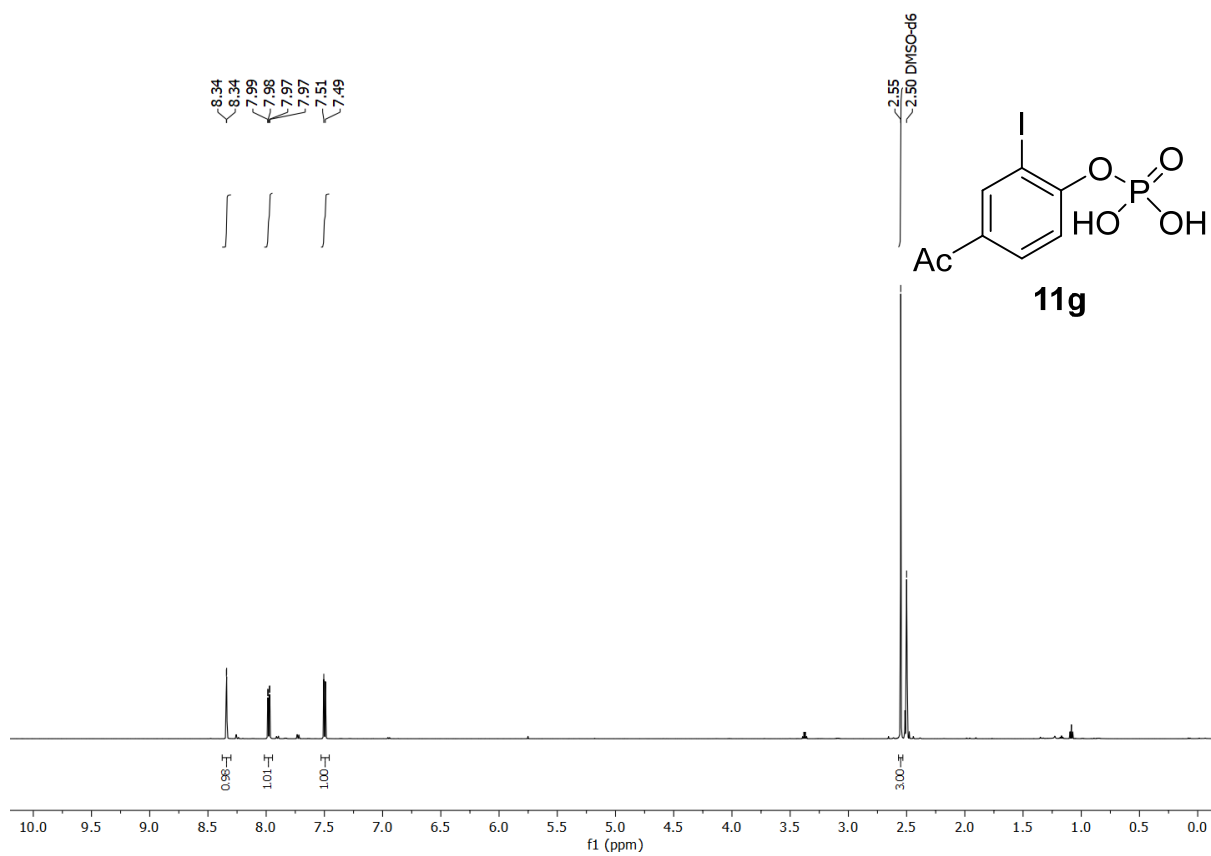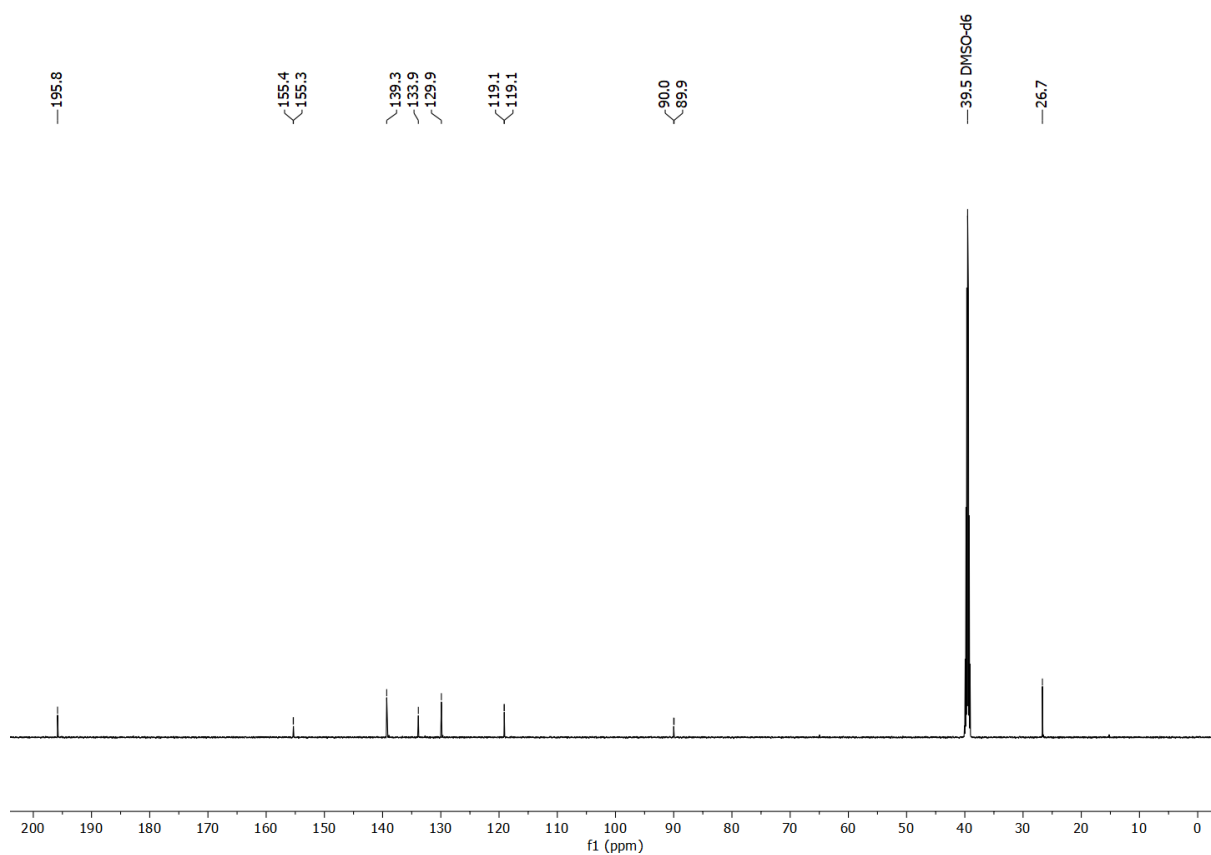

Figure 8: 601 MHz <sup>1</sup>H- and 151 MHz <sup>13</sup>C-NMR-spectrum of **11g** in DMSO-d<sub>6</sub>.

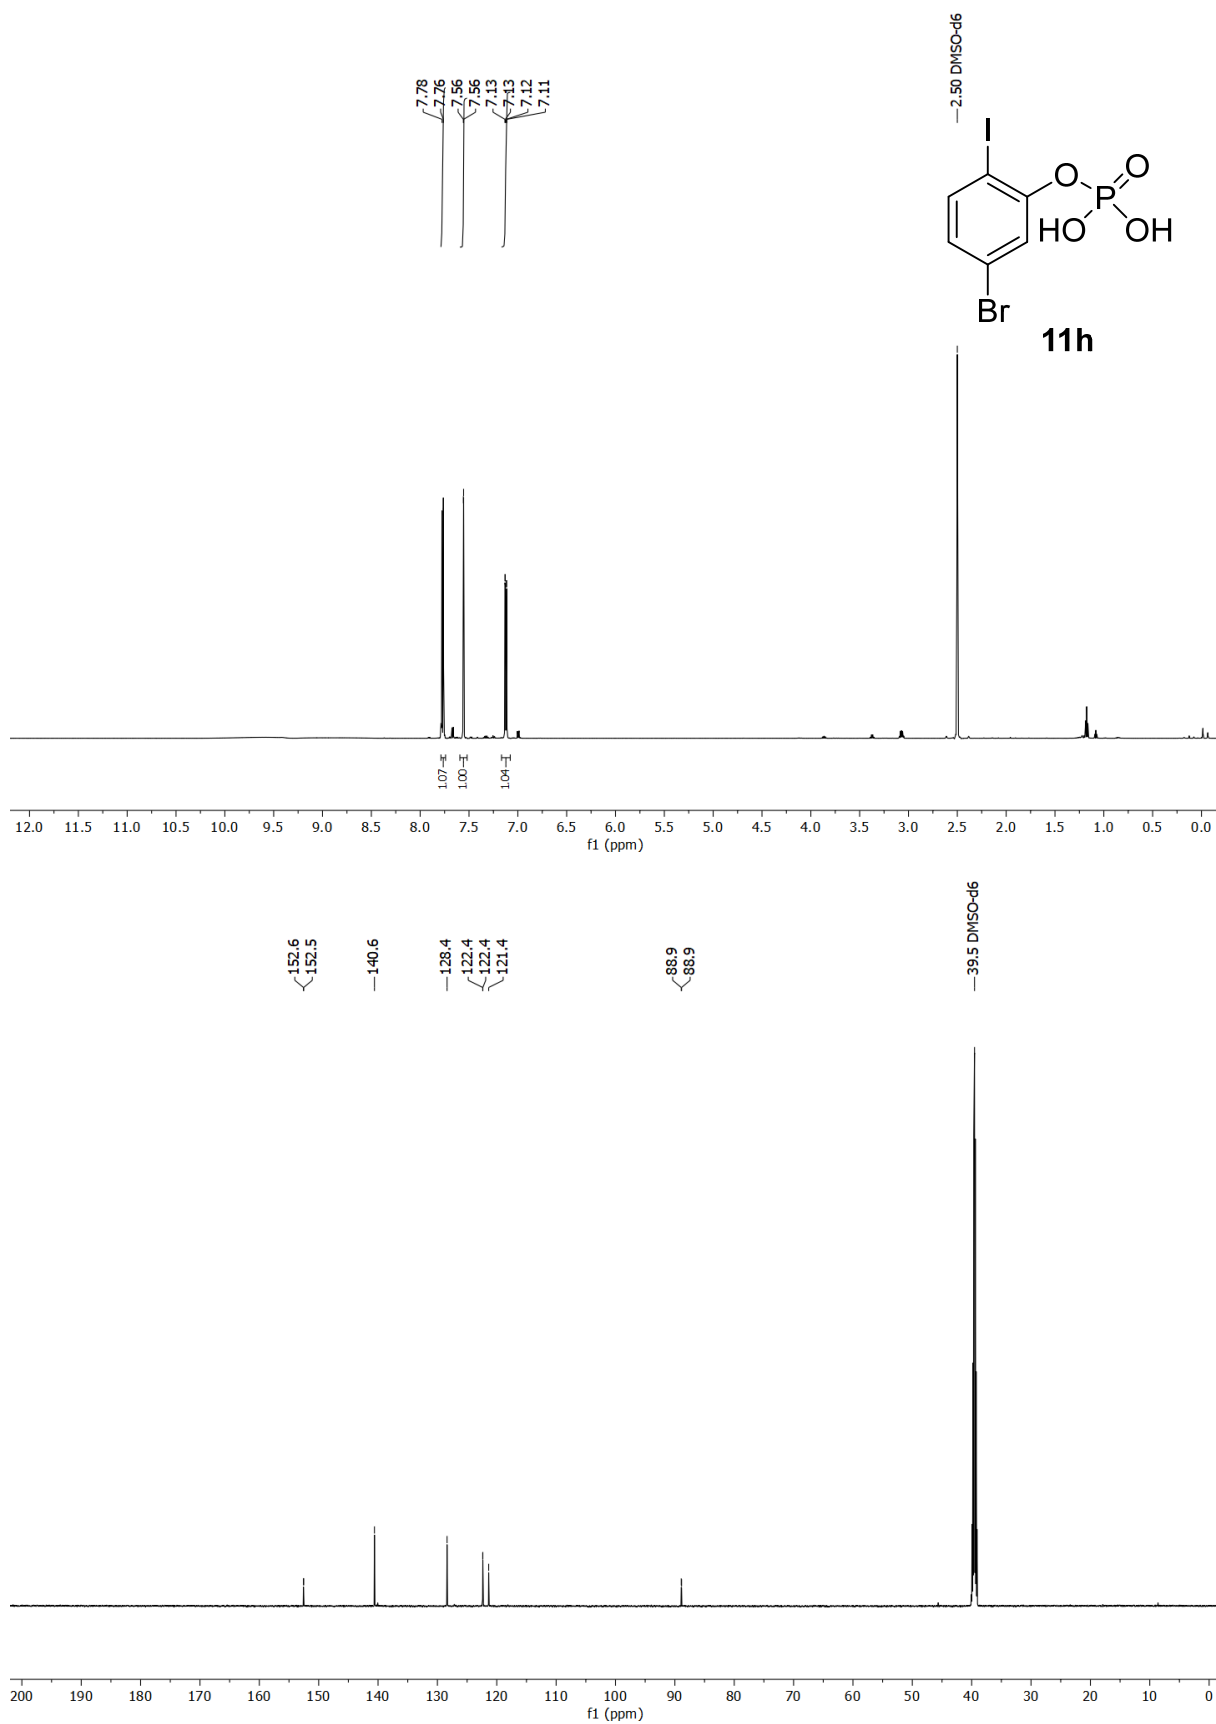

Figure 9: 601 MHz <sup>1</sup>H- and 151 MHz <sup>13</sup>C-NMR-spectrum of **11h** in DMSO-*d*<sub>6</sub>.

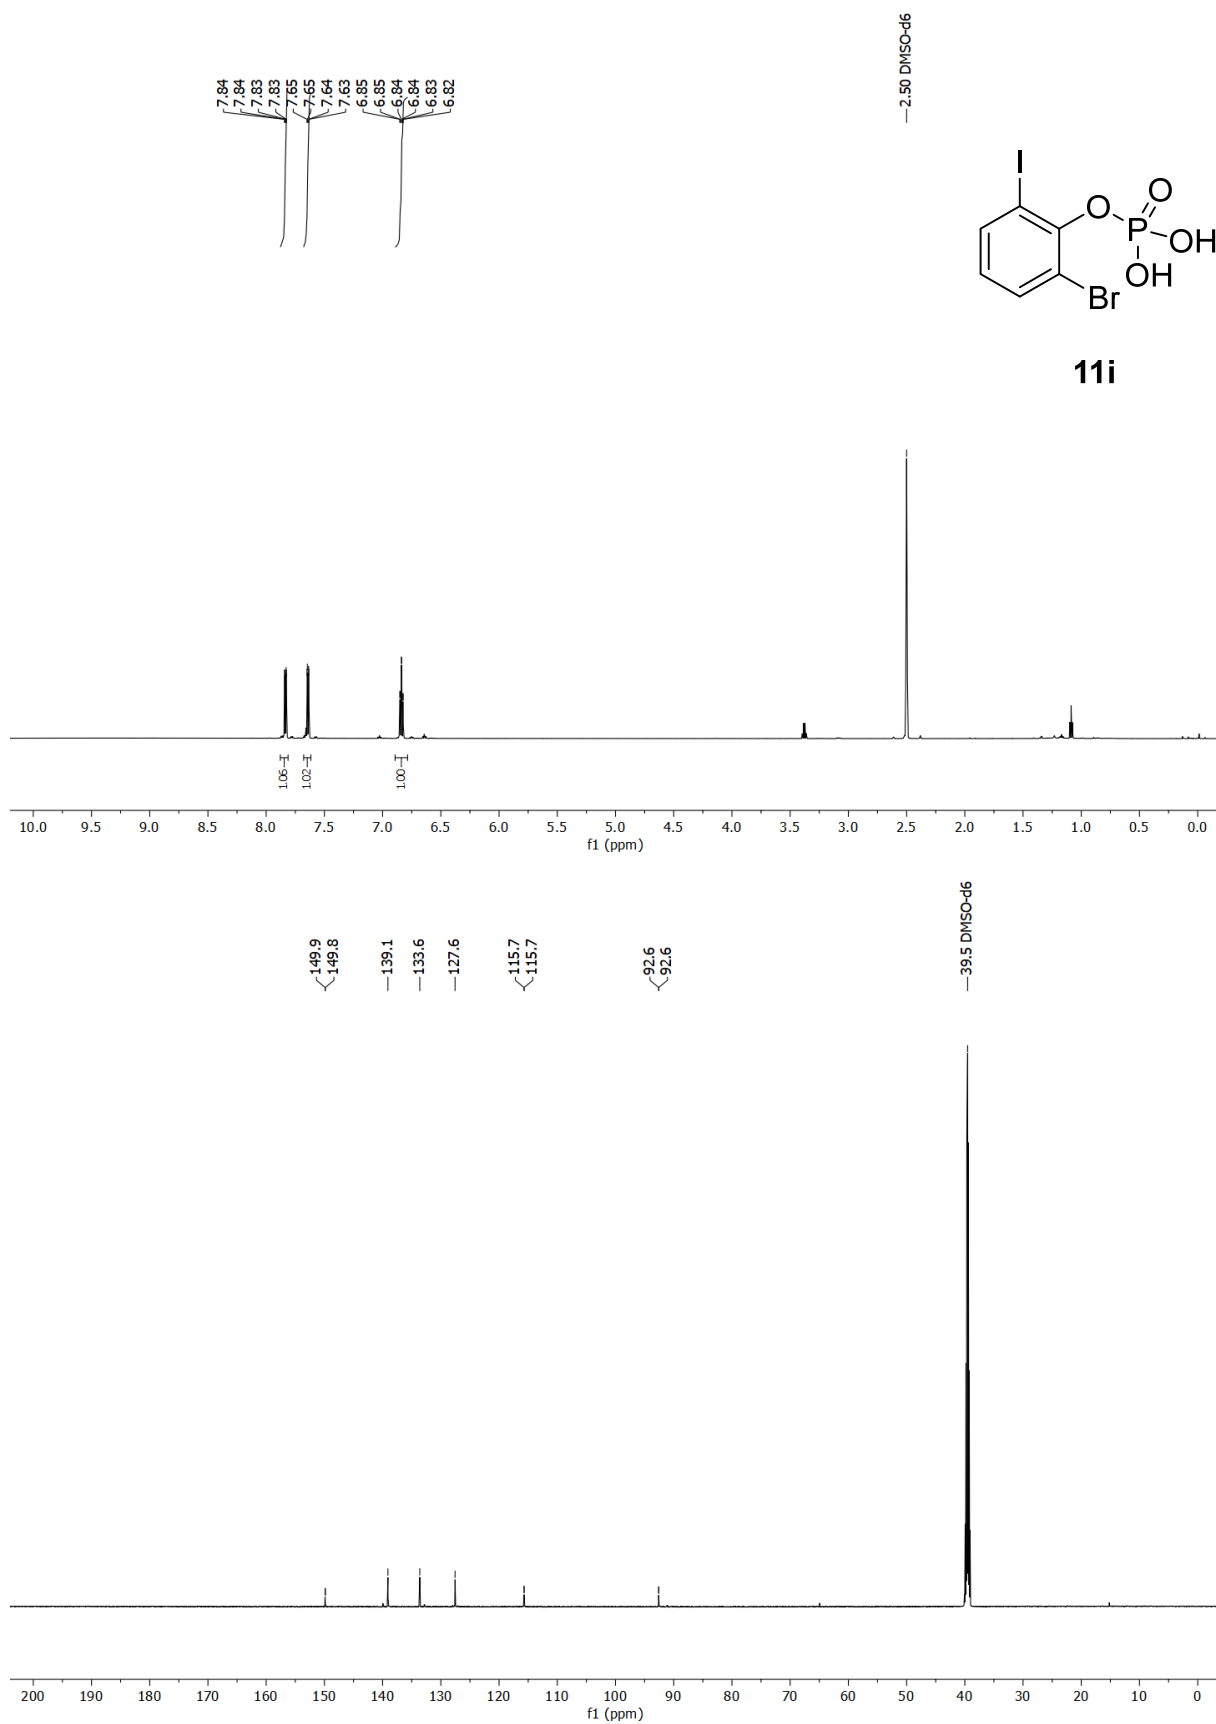

Figure 10: 600 MHz <sup>1</sup>H- and 151 MHz <sup>13</sup>C-NMR-spectrum of **11i** in DMSO-*d*<sub>6</sub>.



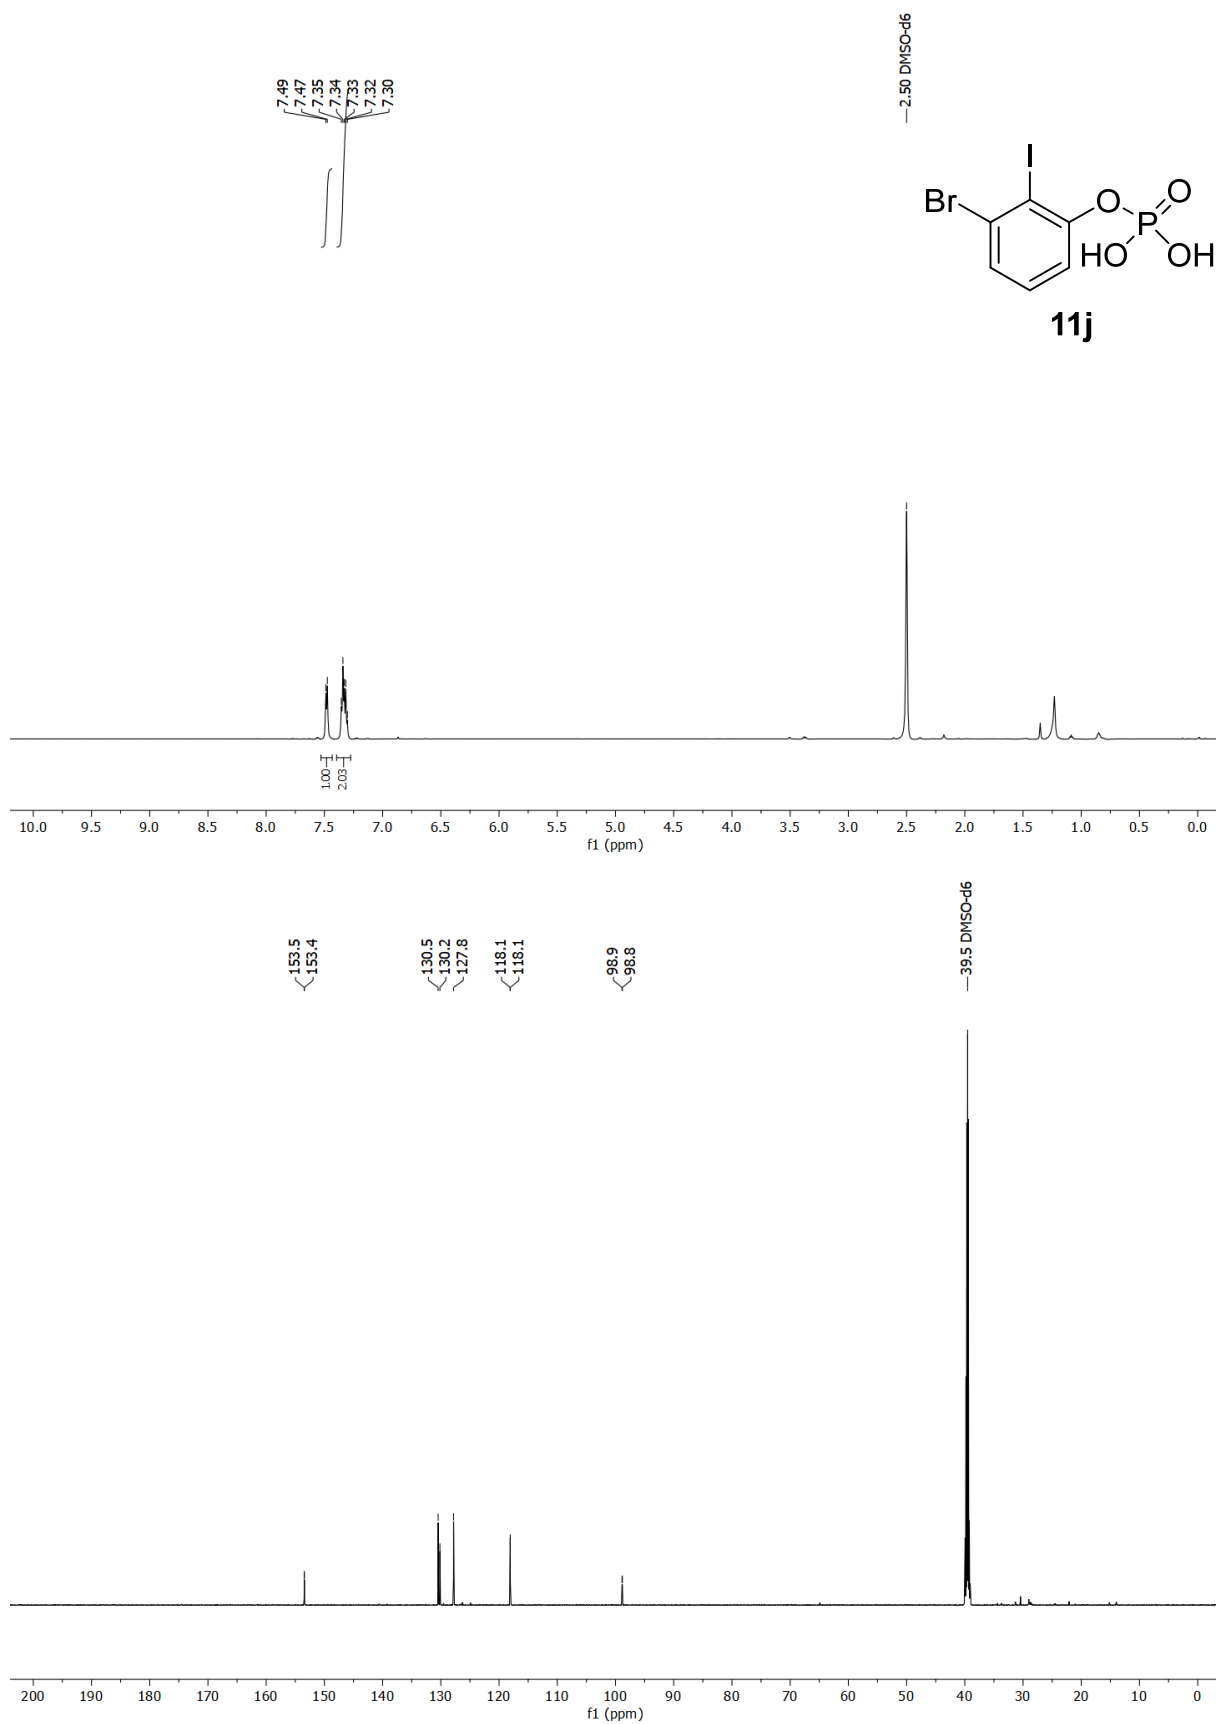

Figure 11: 600 MHz <sup>1</sup>H- and 151 MHz <sup>13</sup>C-NMR-spectrum of **11j** in DMSO-*d*<sub>6</sub>.

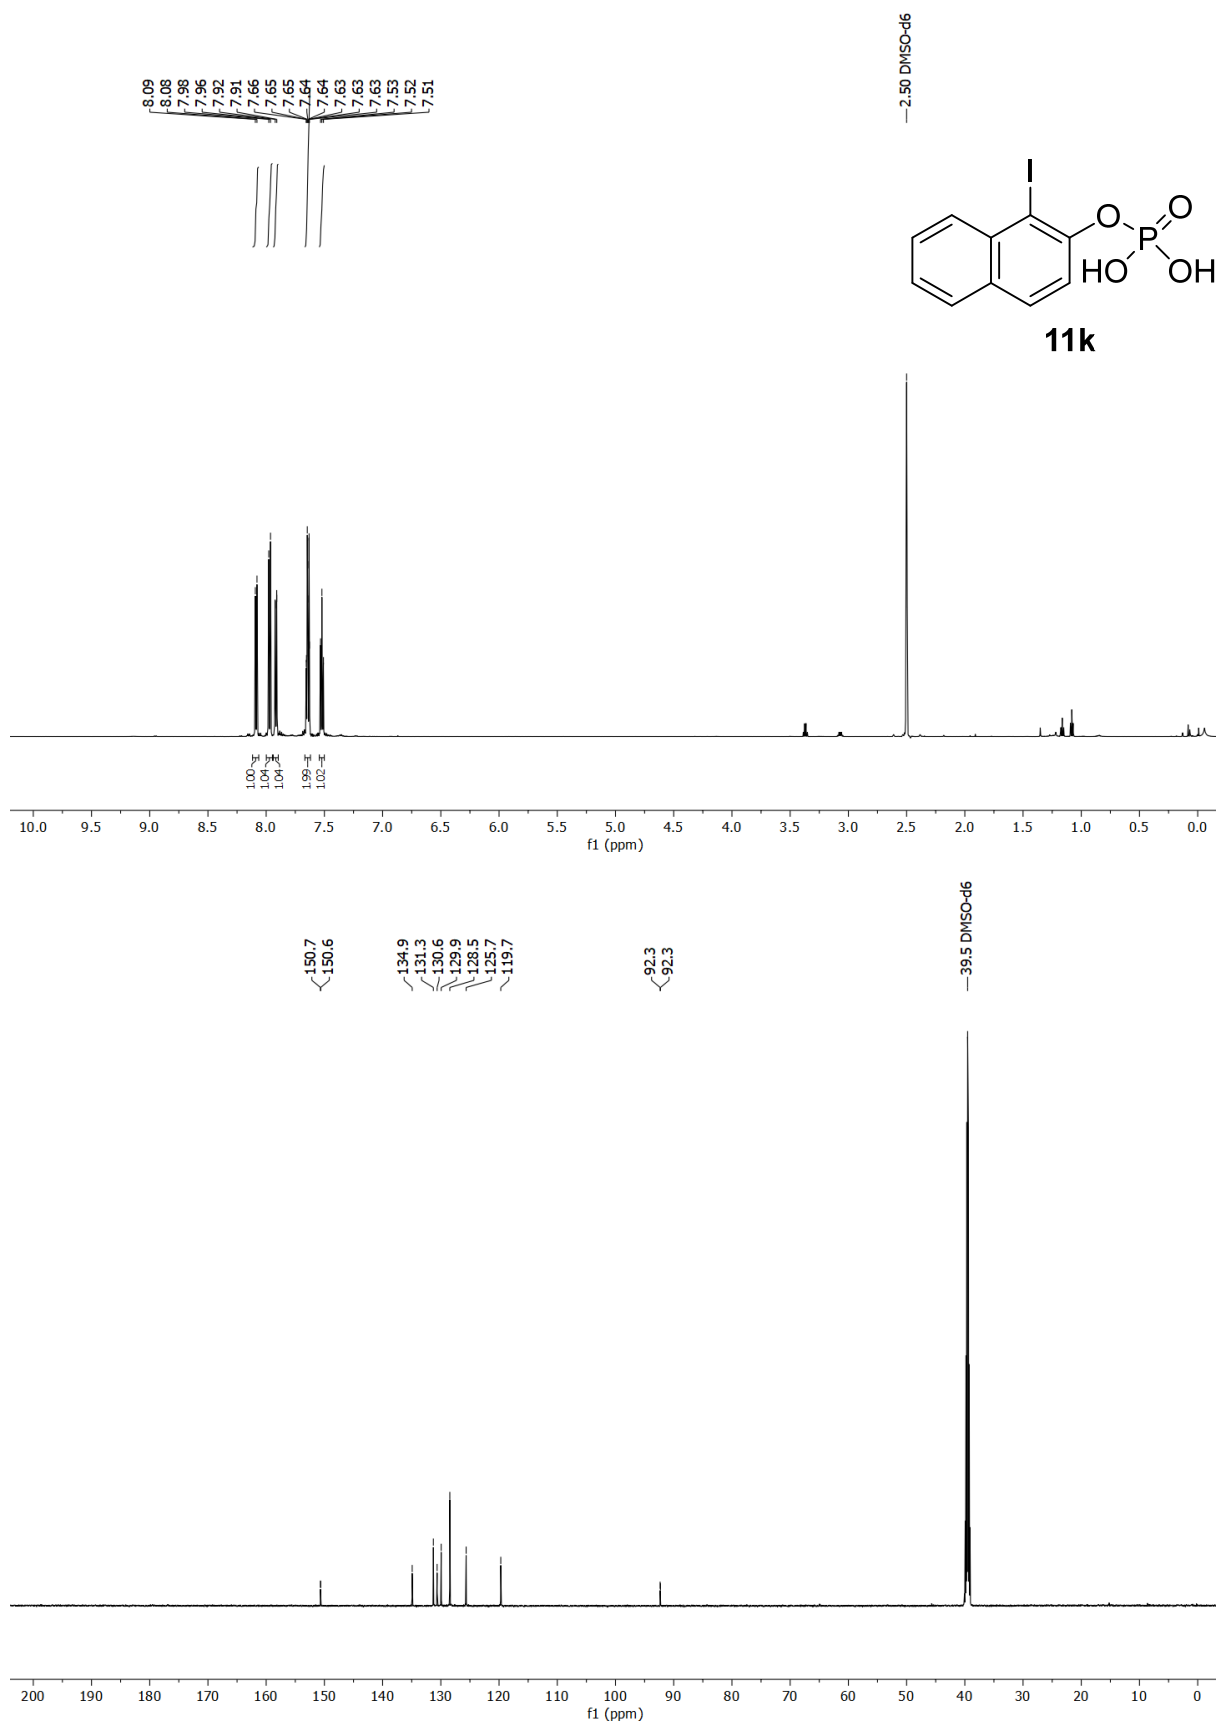

Figure 12: 600 MHz <sup>1</sup>H- and 151 MHz <sup>13</sup>C-NMR-spectrum of **11k** in DMSO-d<sub>6</sub>.

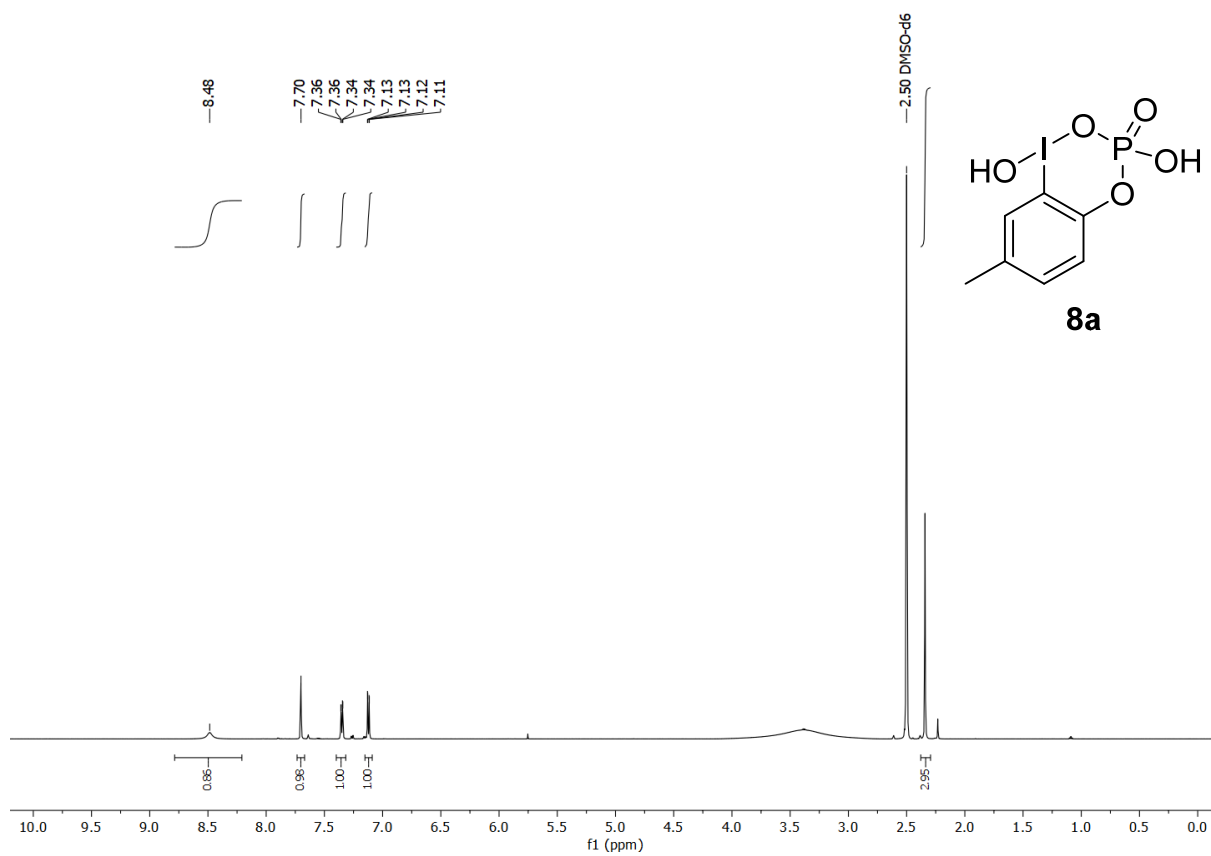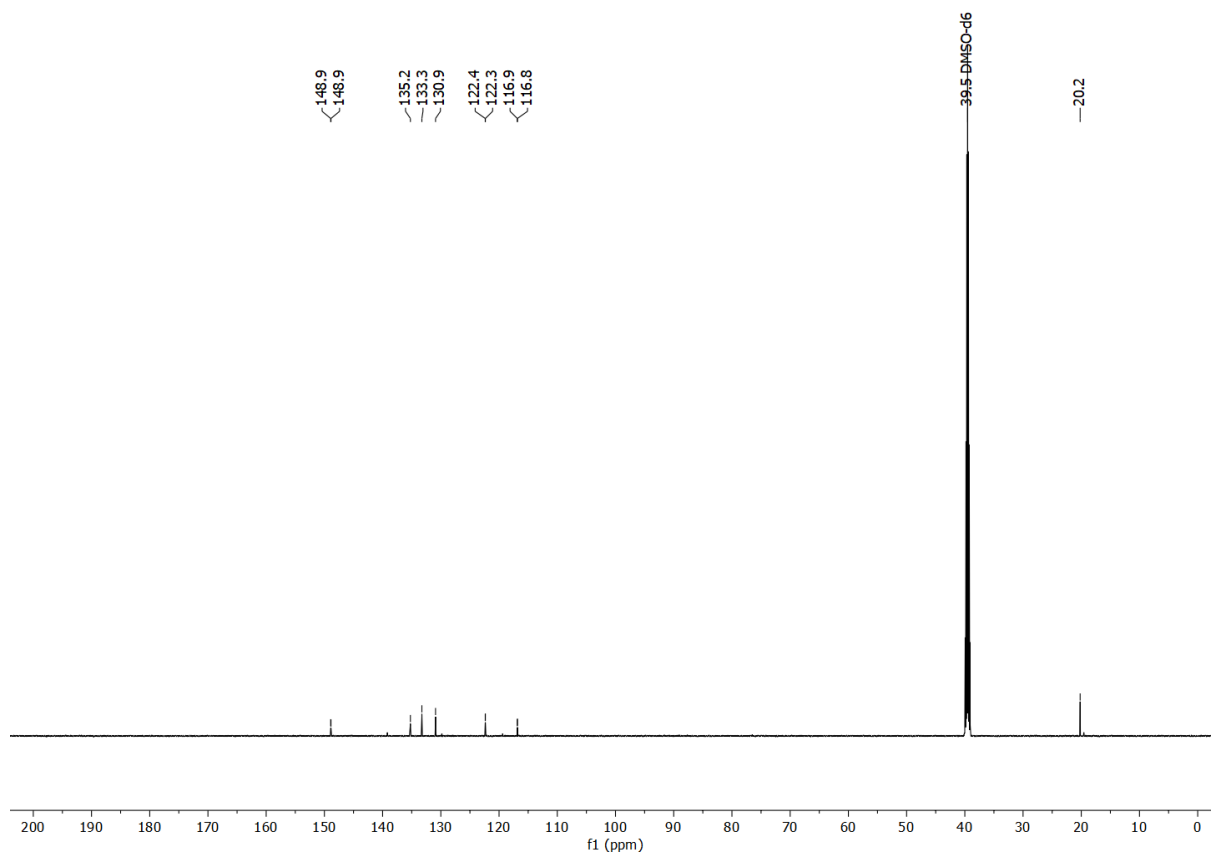

Figure 13: 601 MHz <sup>1</sup>H- and 151 MHz <sup>13</sup>C-NMR-spectrum of **8a** in DMSO-*d*<sub>6</sub>.

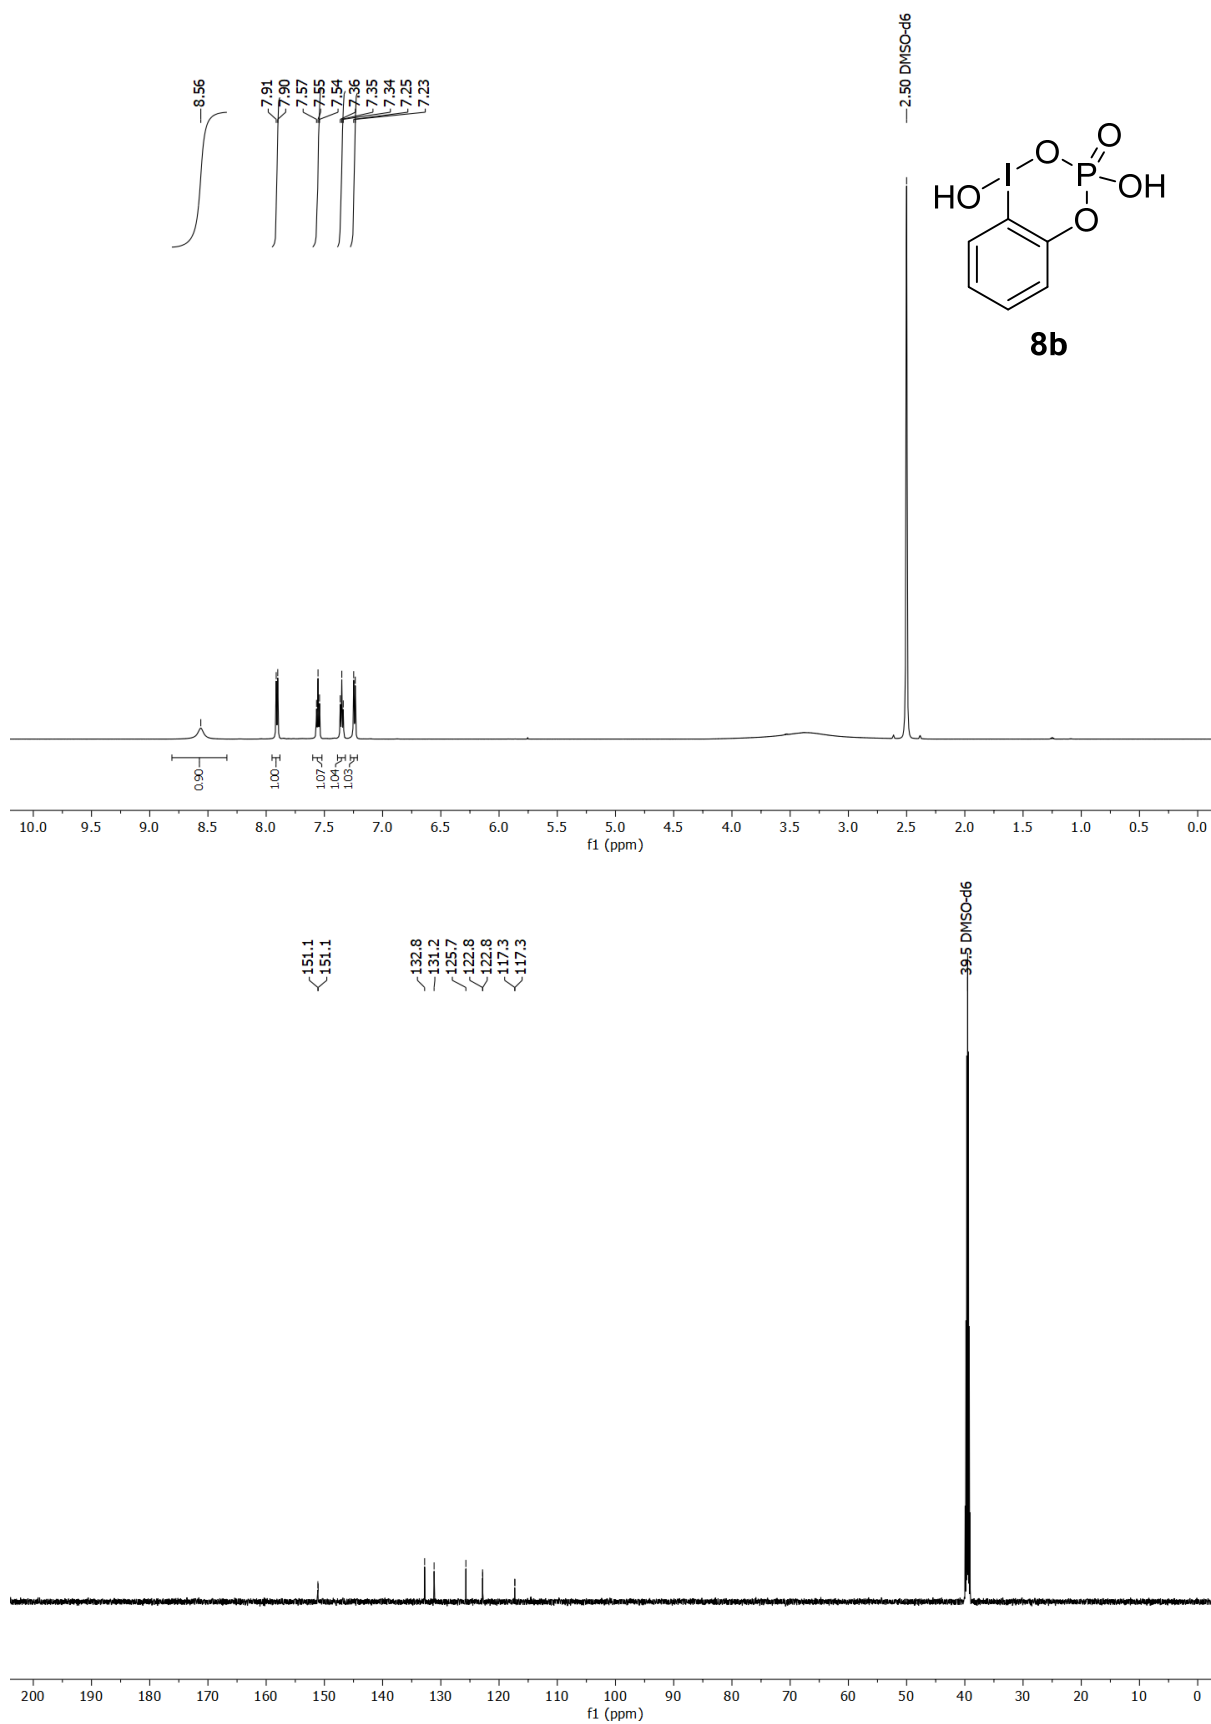

Figure 14: 600 MHz <sup>1</sup>H- and 151 MHz <sup>13</sup>C-NMR-spectrum of **8b** in DMSO-d<sub>6</sub>.

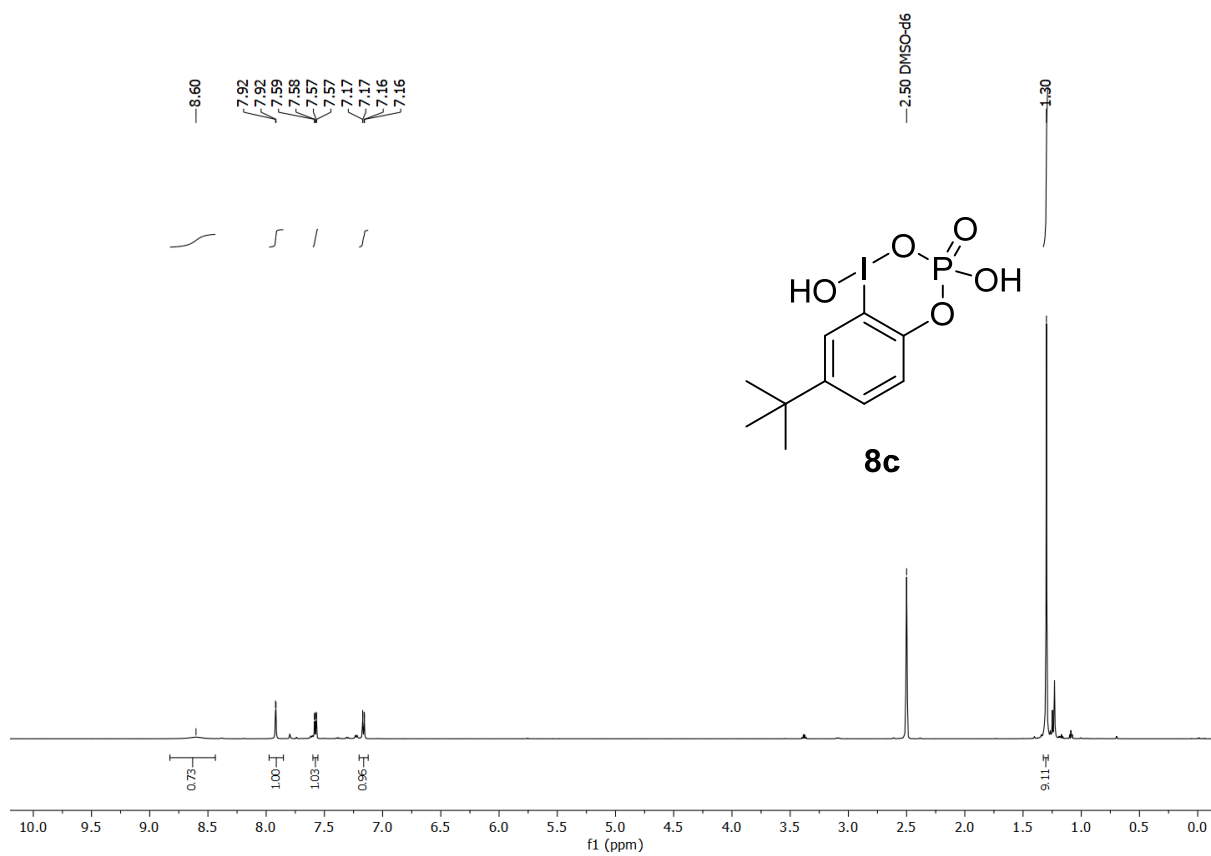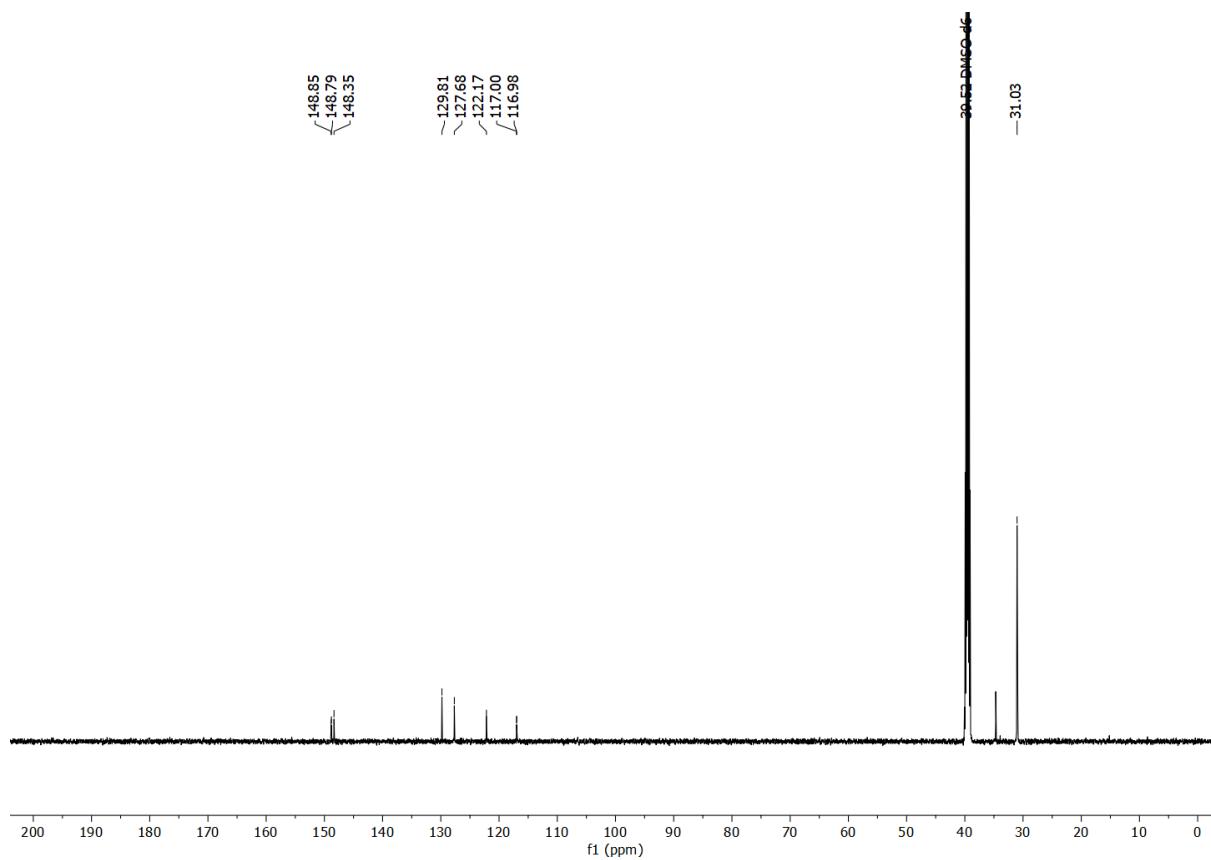

Figure 15: 600 MHz <sup>1</sup>H- and 151 MHz <sup>13</sup>C-NMR-spectrum of **8c** in DMSO-*d*<sub>6</sub>.

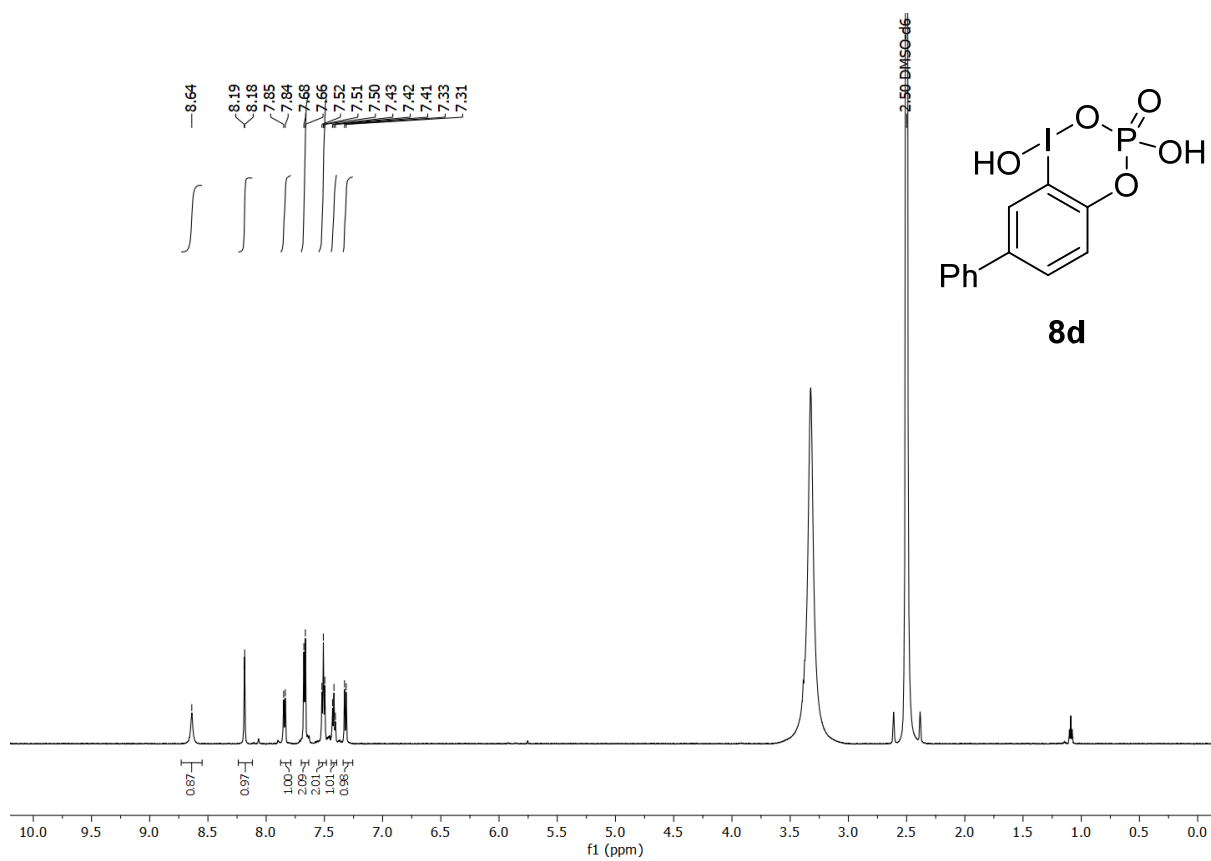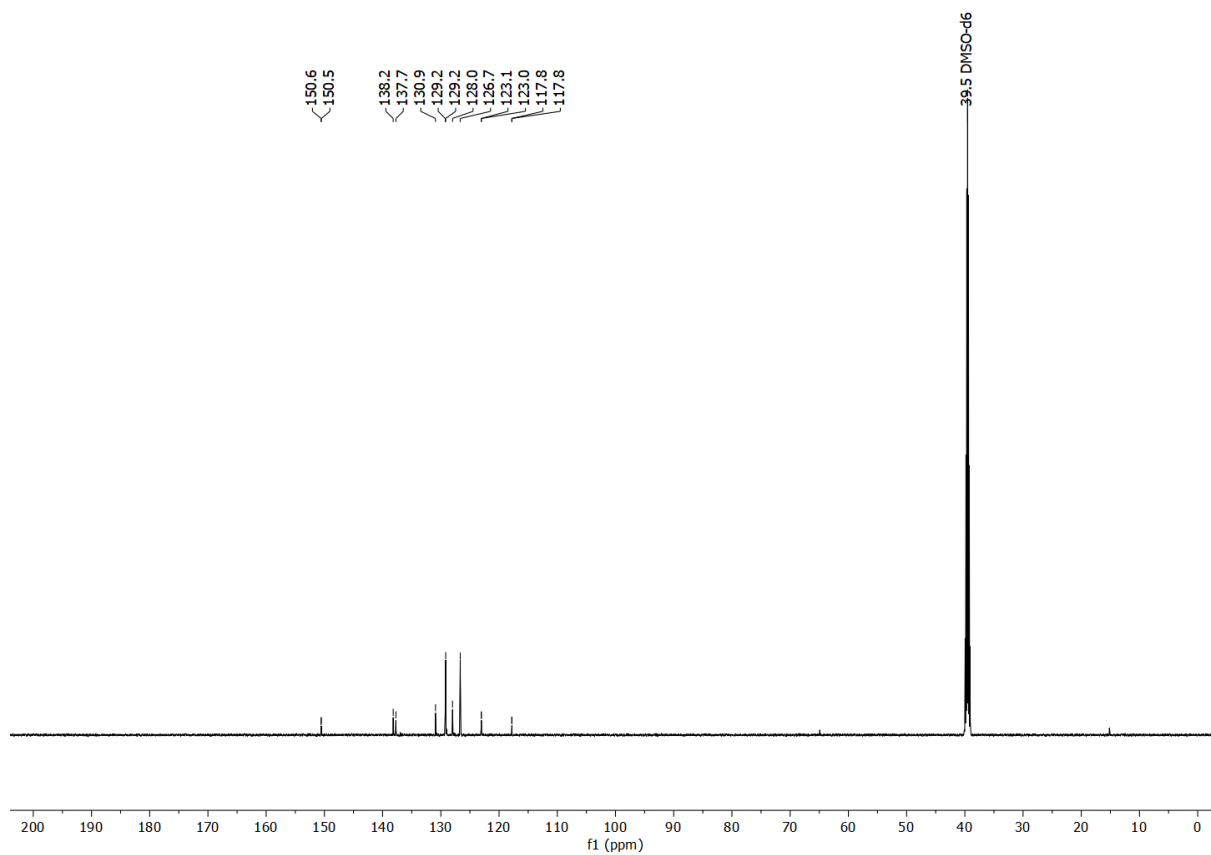

Figure 16: 600 MHz <sup>1</sup>H- and 151 MHz <sup>13</sup>C-NMR-spectrum of **8d** in DMSO-*d*<sub>6</sub>.

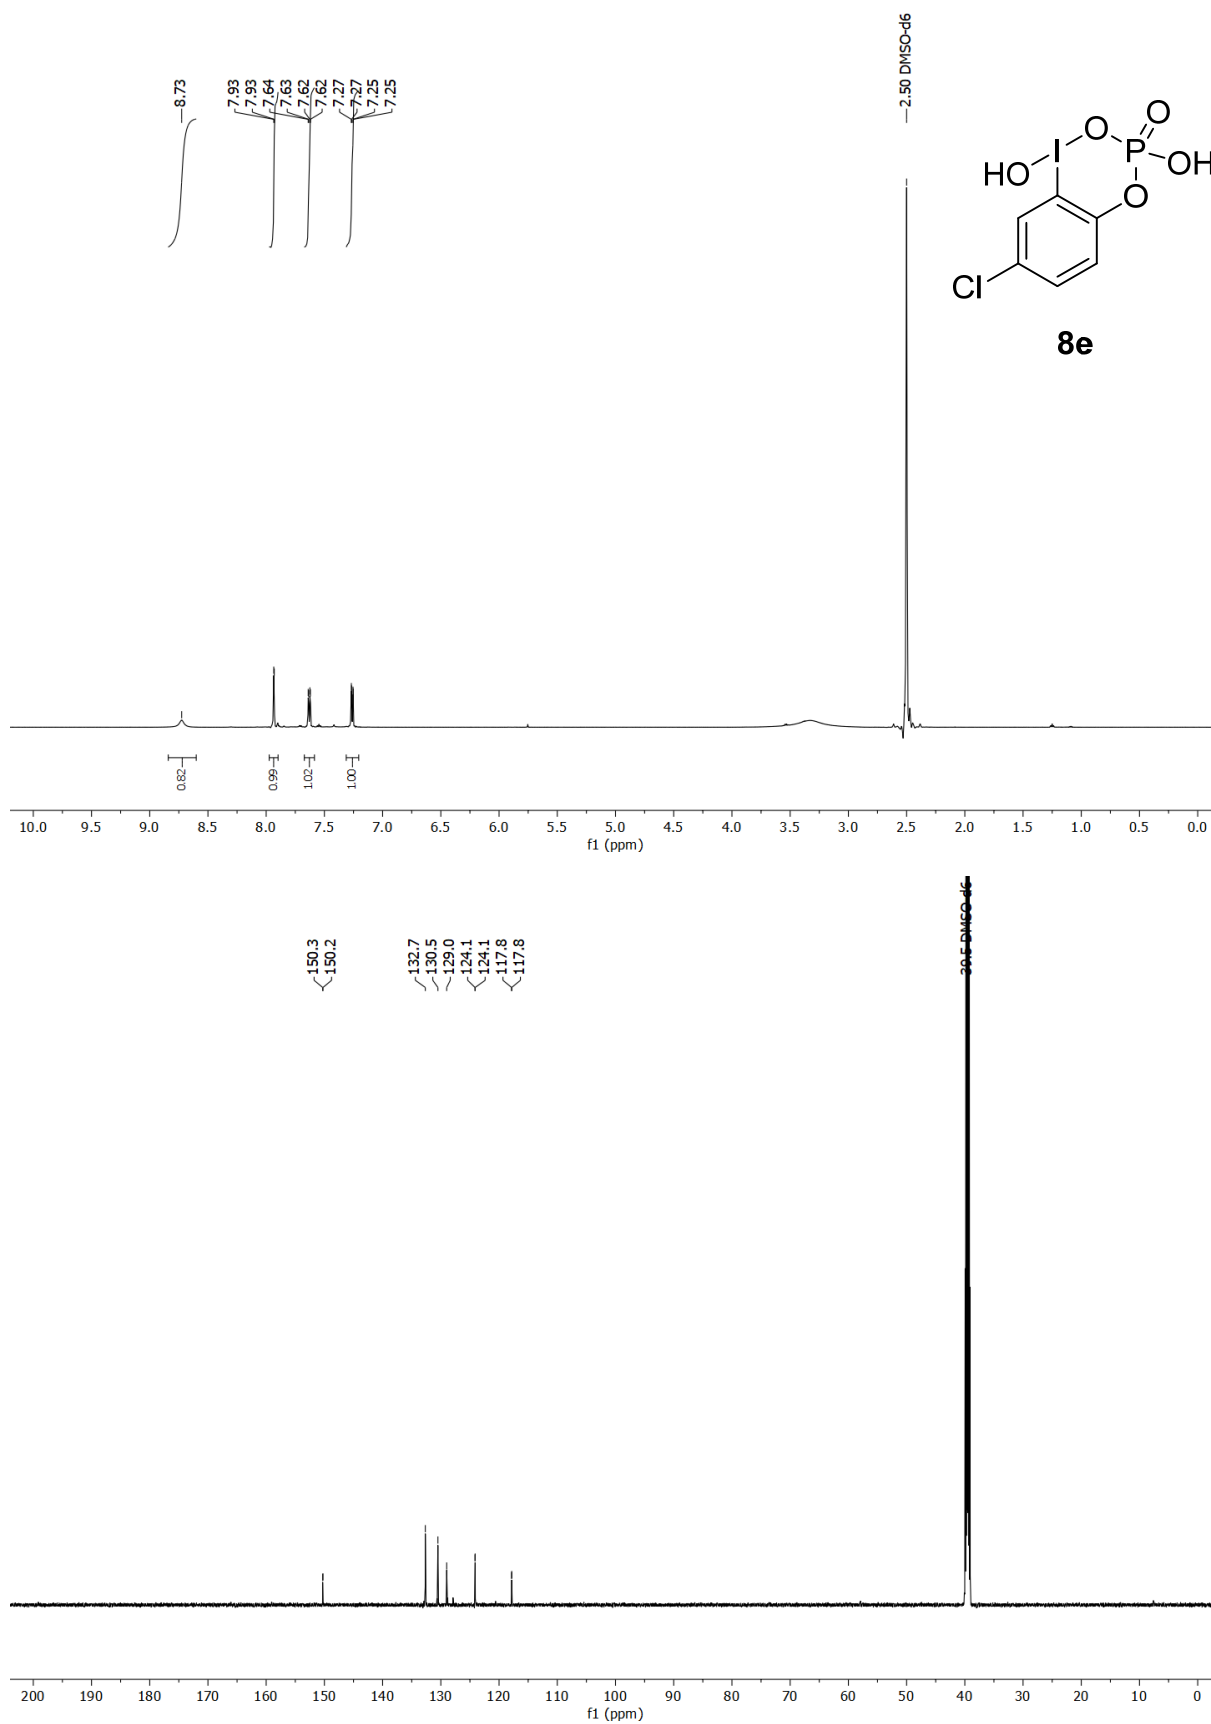

Figure 17: 600 MHz <sup>1</sup>H- and 151 MHz <sup>13</sup>C-NMR-spectrum of **8e** in DMSO-*d*<sub>6</sub>.

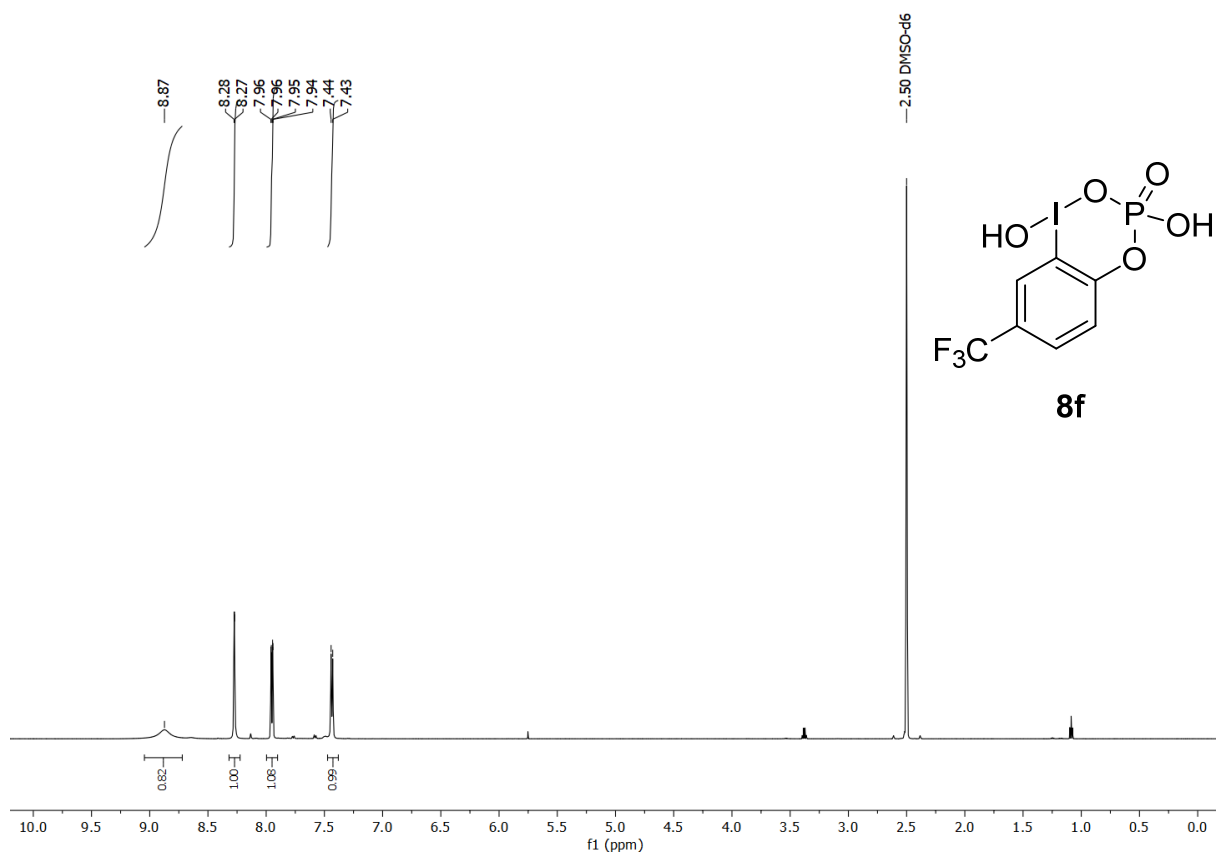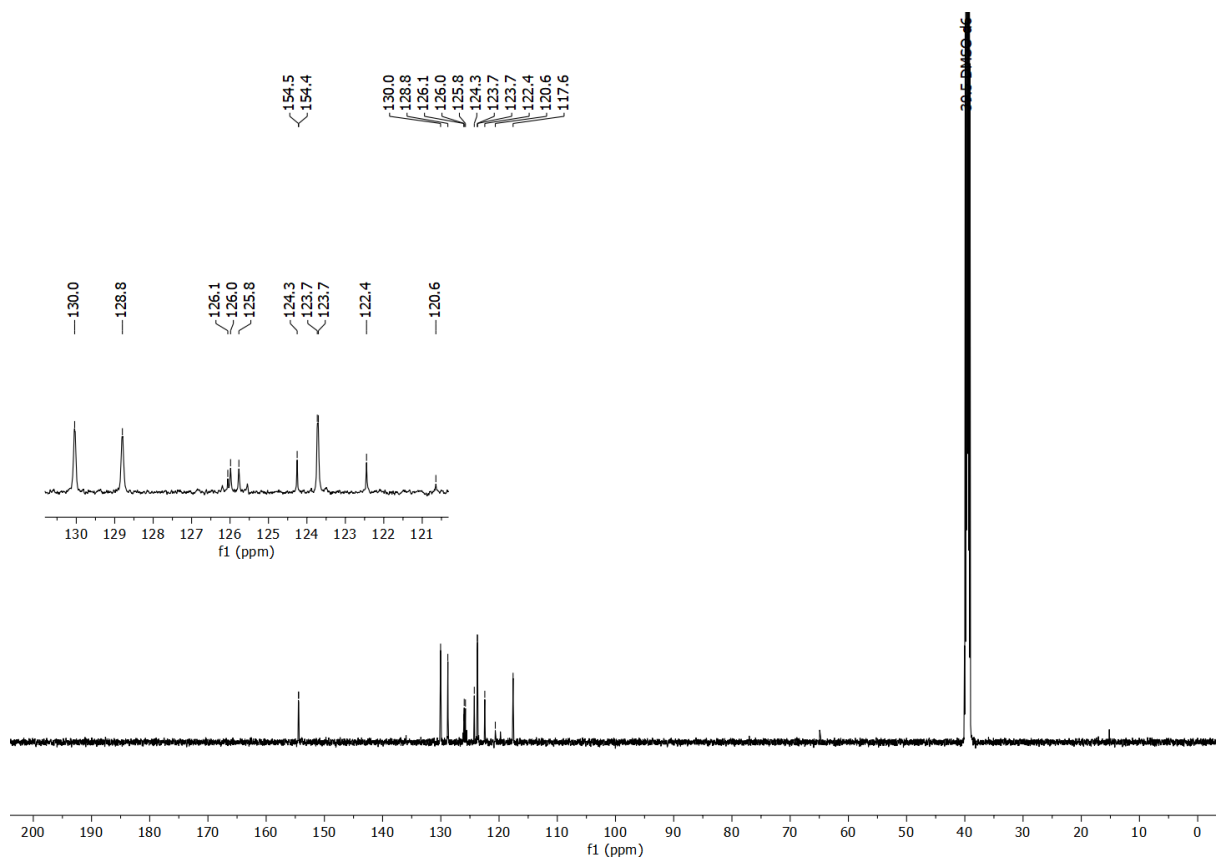

Figure 18: 601 MHz <sup>1</sup>H- and 151 MHz <sup>13</sup>C-NMR-spectrum of **8f** in DMSO-d<sub>6</sub>.



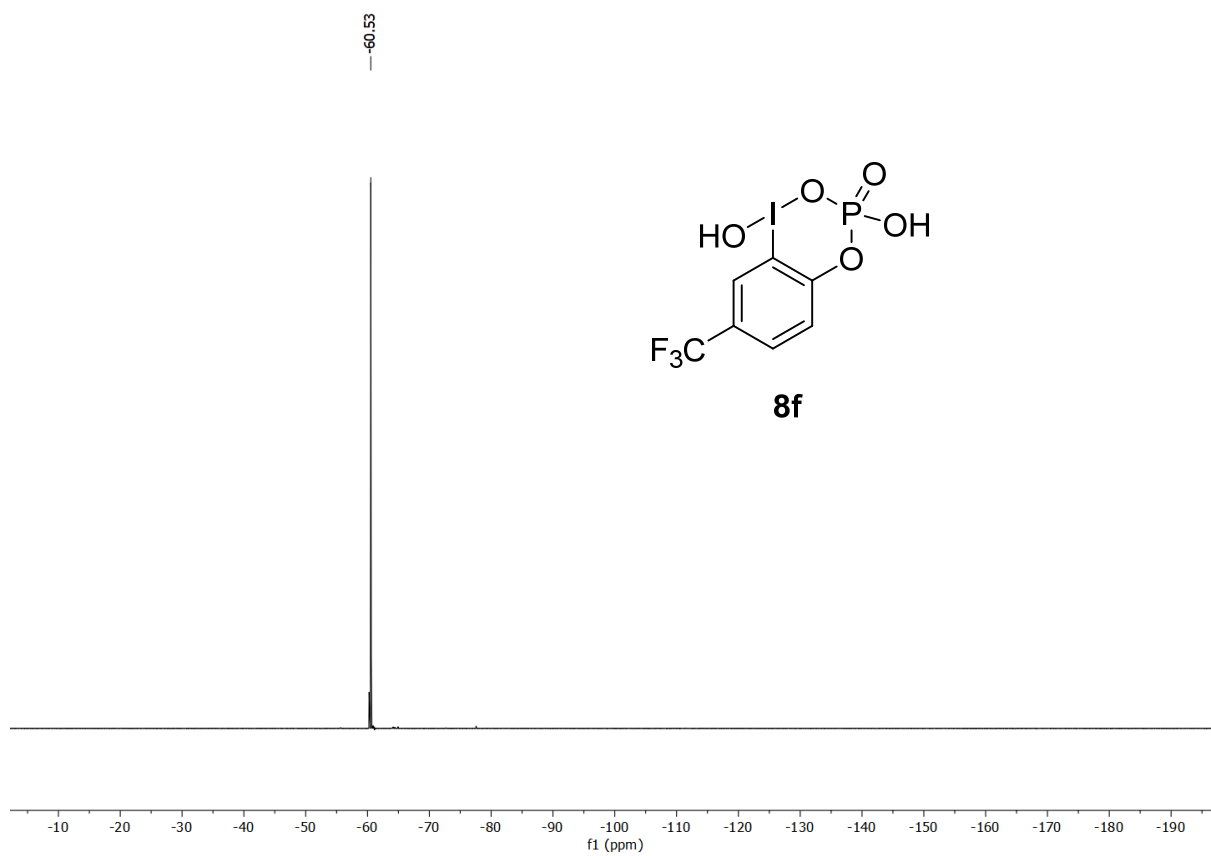

Figure 19: 565 MHz  $^{19}\text{F}$ -NMR-spectrum of **8f** in  $\text{DMSO-}d_6$ .

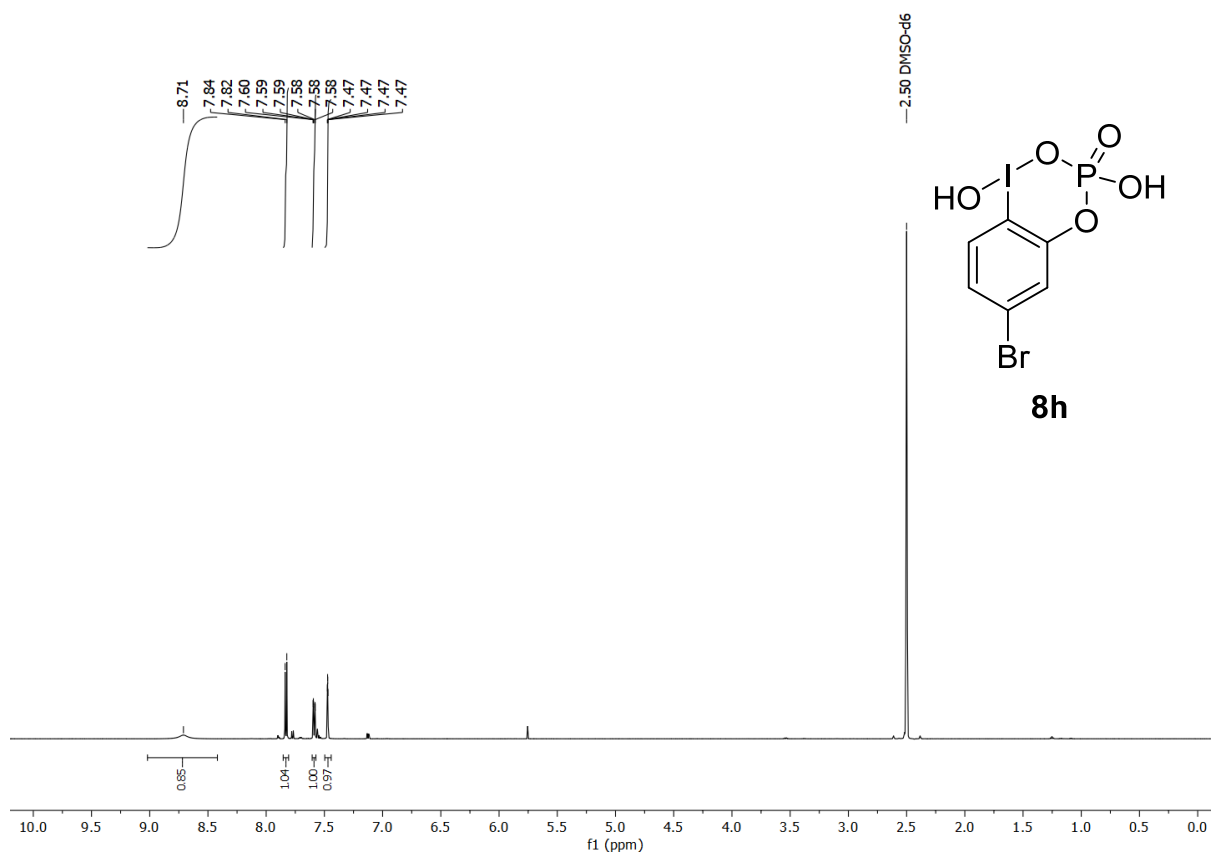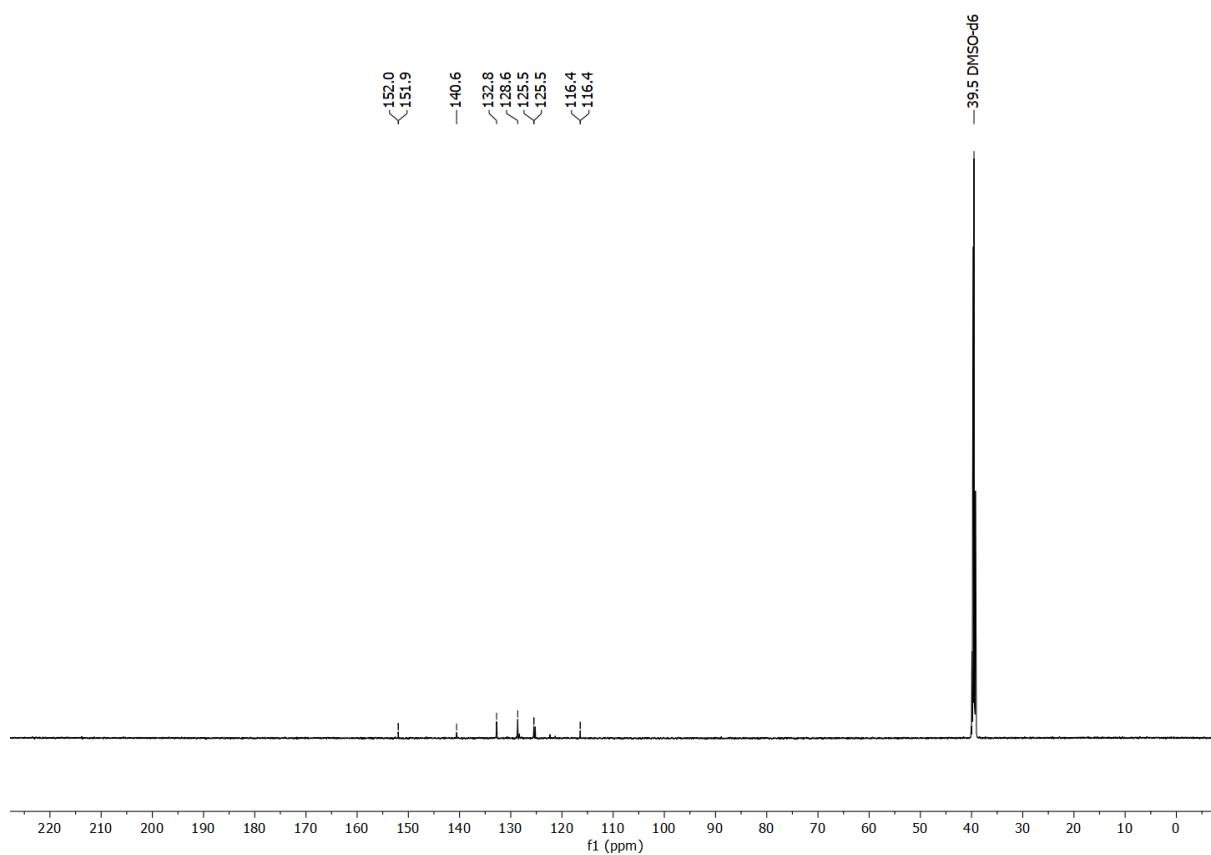

Figure 20: 601 MHz <sup>1</sup>H- and 151 MHz <sup>13</sup>C-NMR-spectrum of **8h** in DMSO-d<sub>6</sub>.

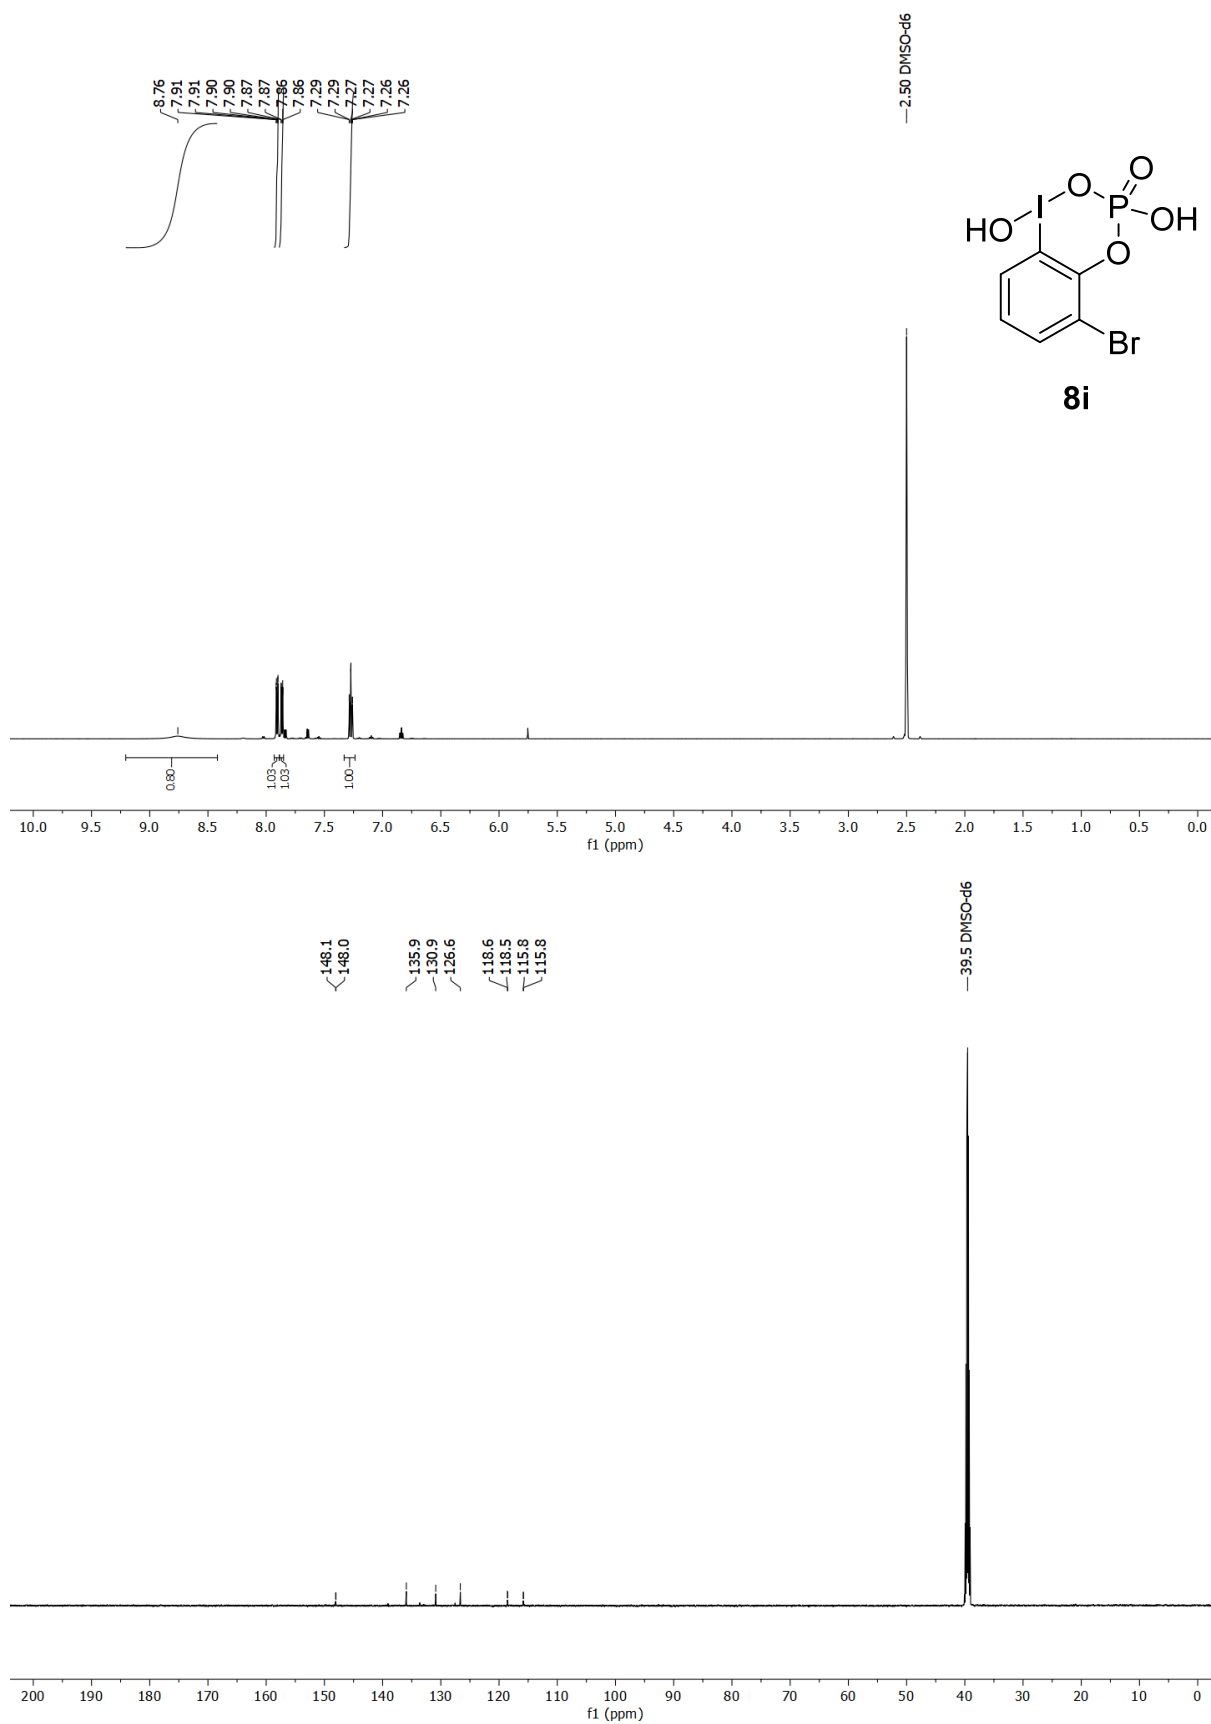

Figure 21: 601 MHz <sup>1</sup>H- and 151 MHz <sup>13</sup>C-NMR-spectrum of **8i** in DMSO-*d*<sub>6</sub>.

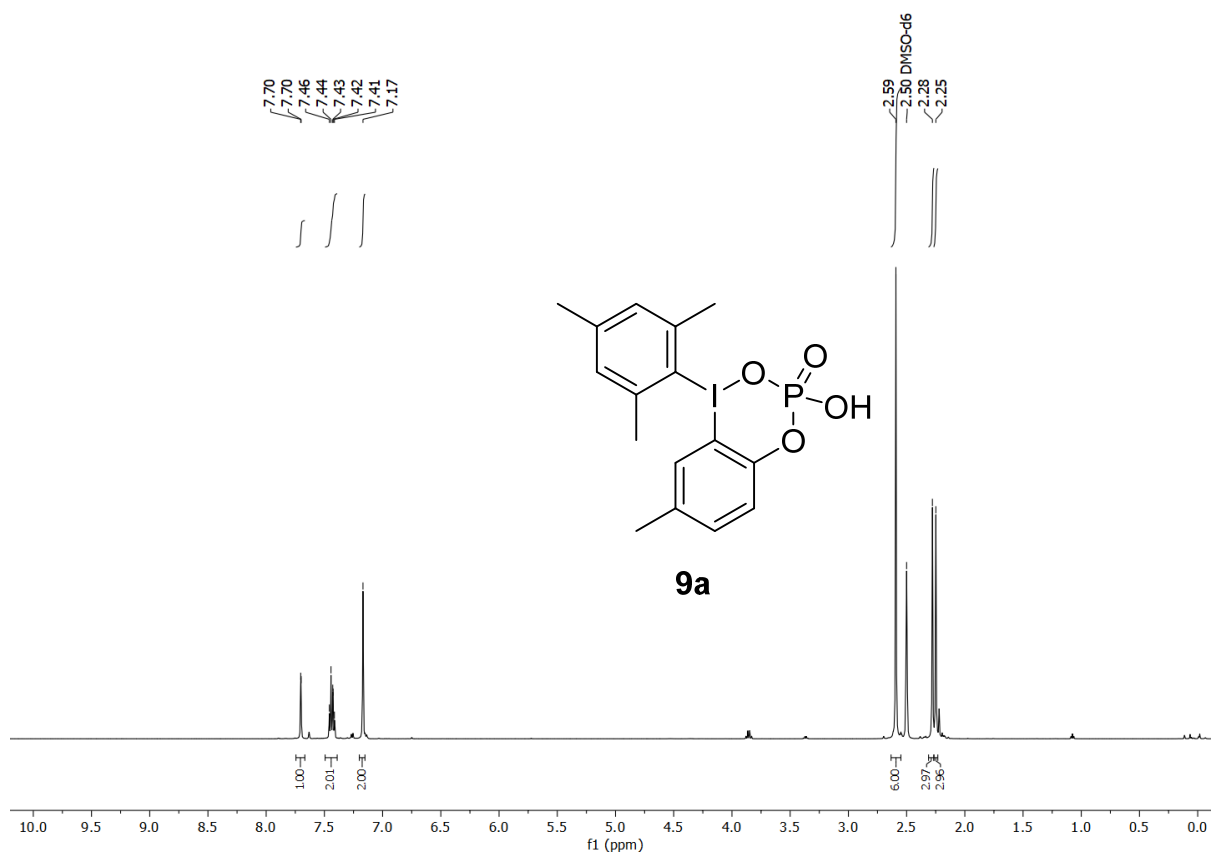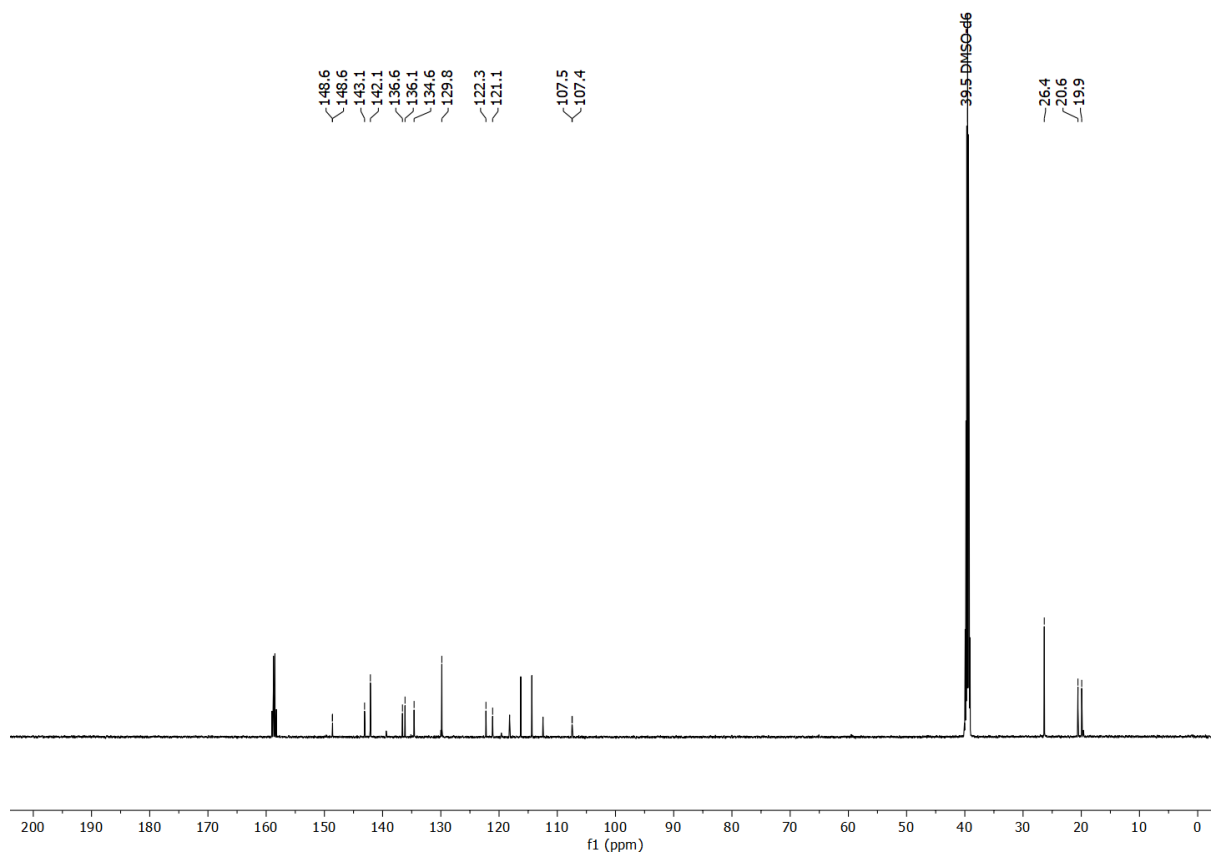

Figure 22: 600 MHz <sup>1</sup>H- and 151 MHz <sup>13</sup>C-NMR-spectrum of **9a** in DMSO-d<sub>6</sub>+TFA.

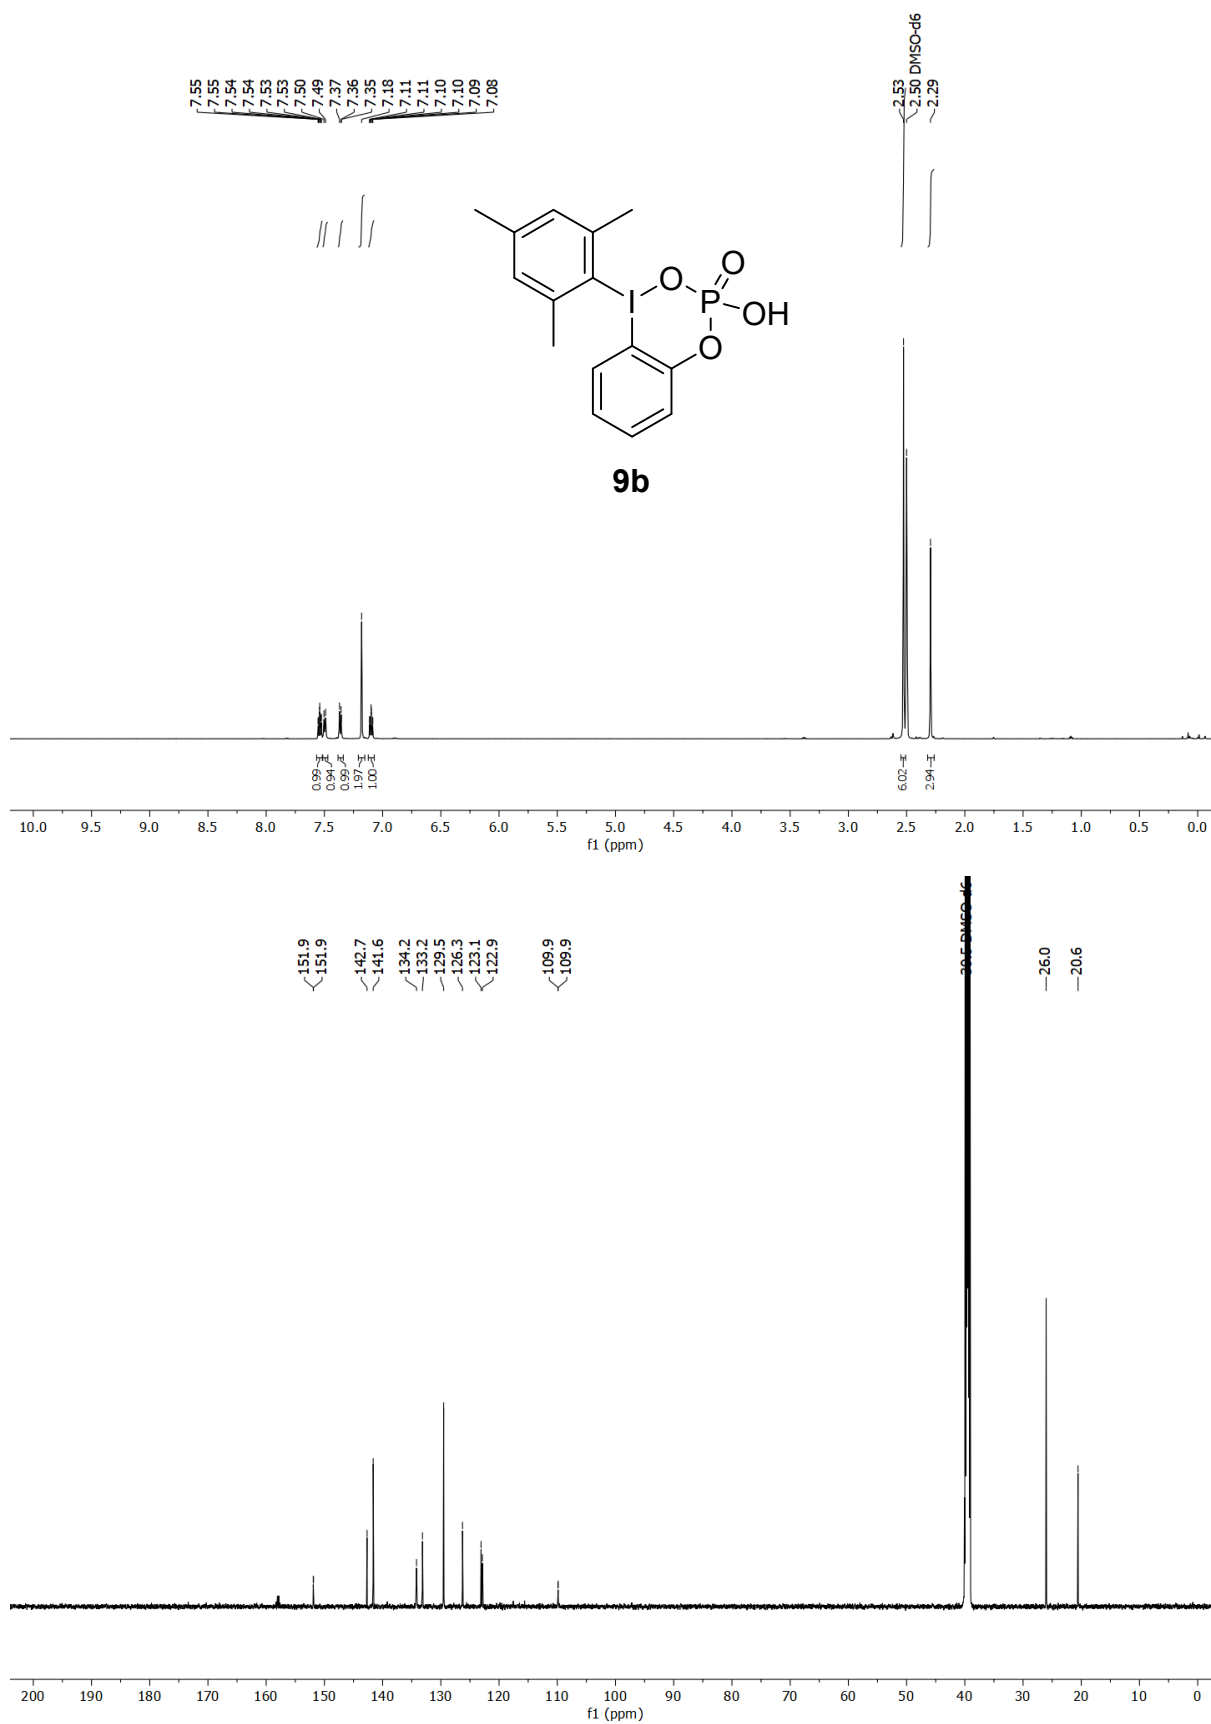

Figure 23: 601 MHz <sup>1</sup>H- and 151 MHz <sup>13</sup>C-NMR-spectrum of **9b** in DMSO-*d*<sub>6</sub>+TFA.

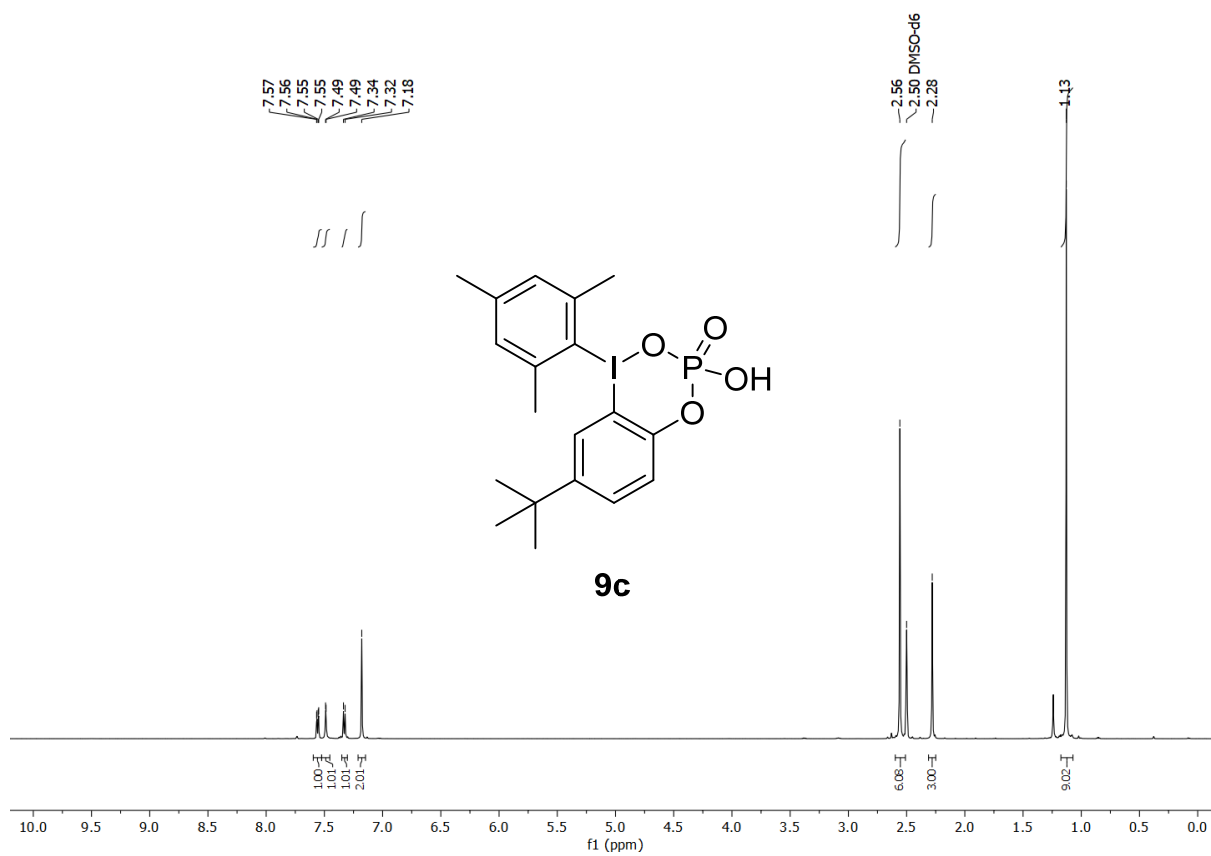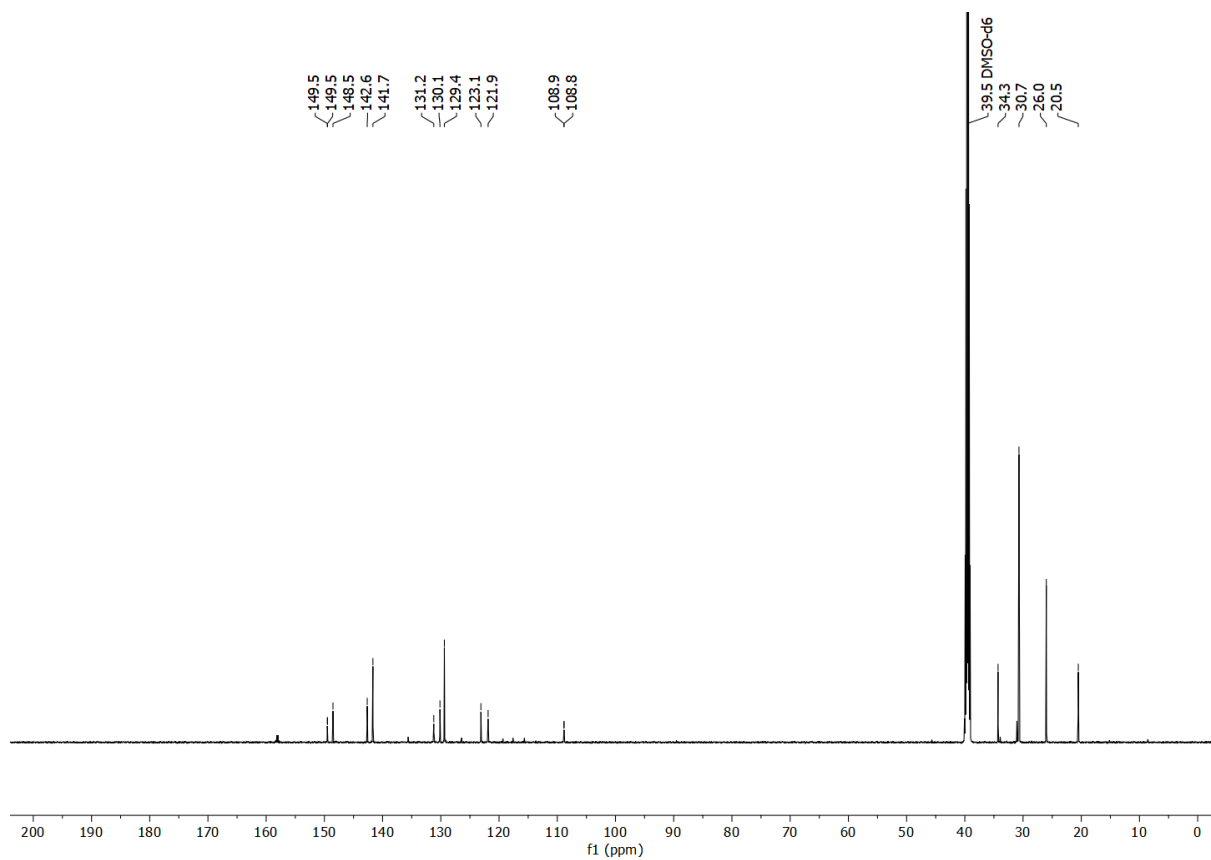

Figure 24: 601 MHz  $^1\text{H}$ - and 151 MHz  $^{13}\text{C}$ -NMR-spectrum of **9c** in  $\text{DMSO-}d_6$ +TFA.

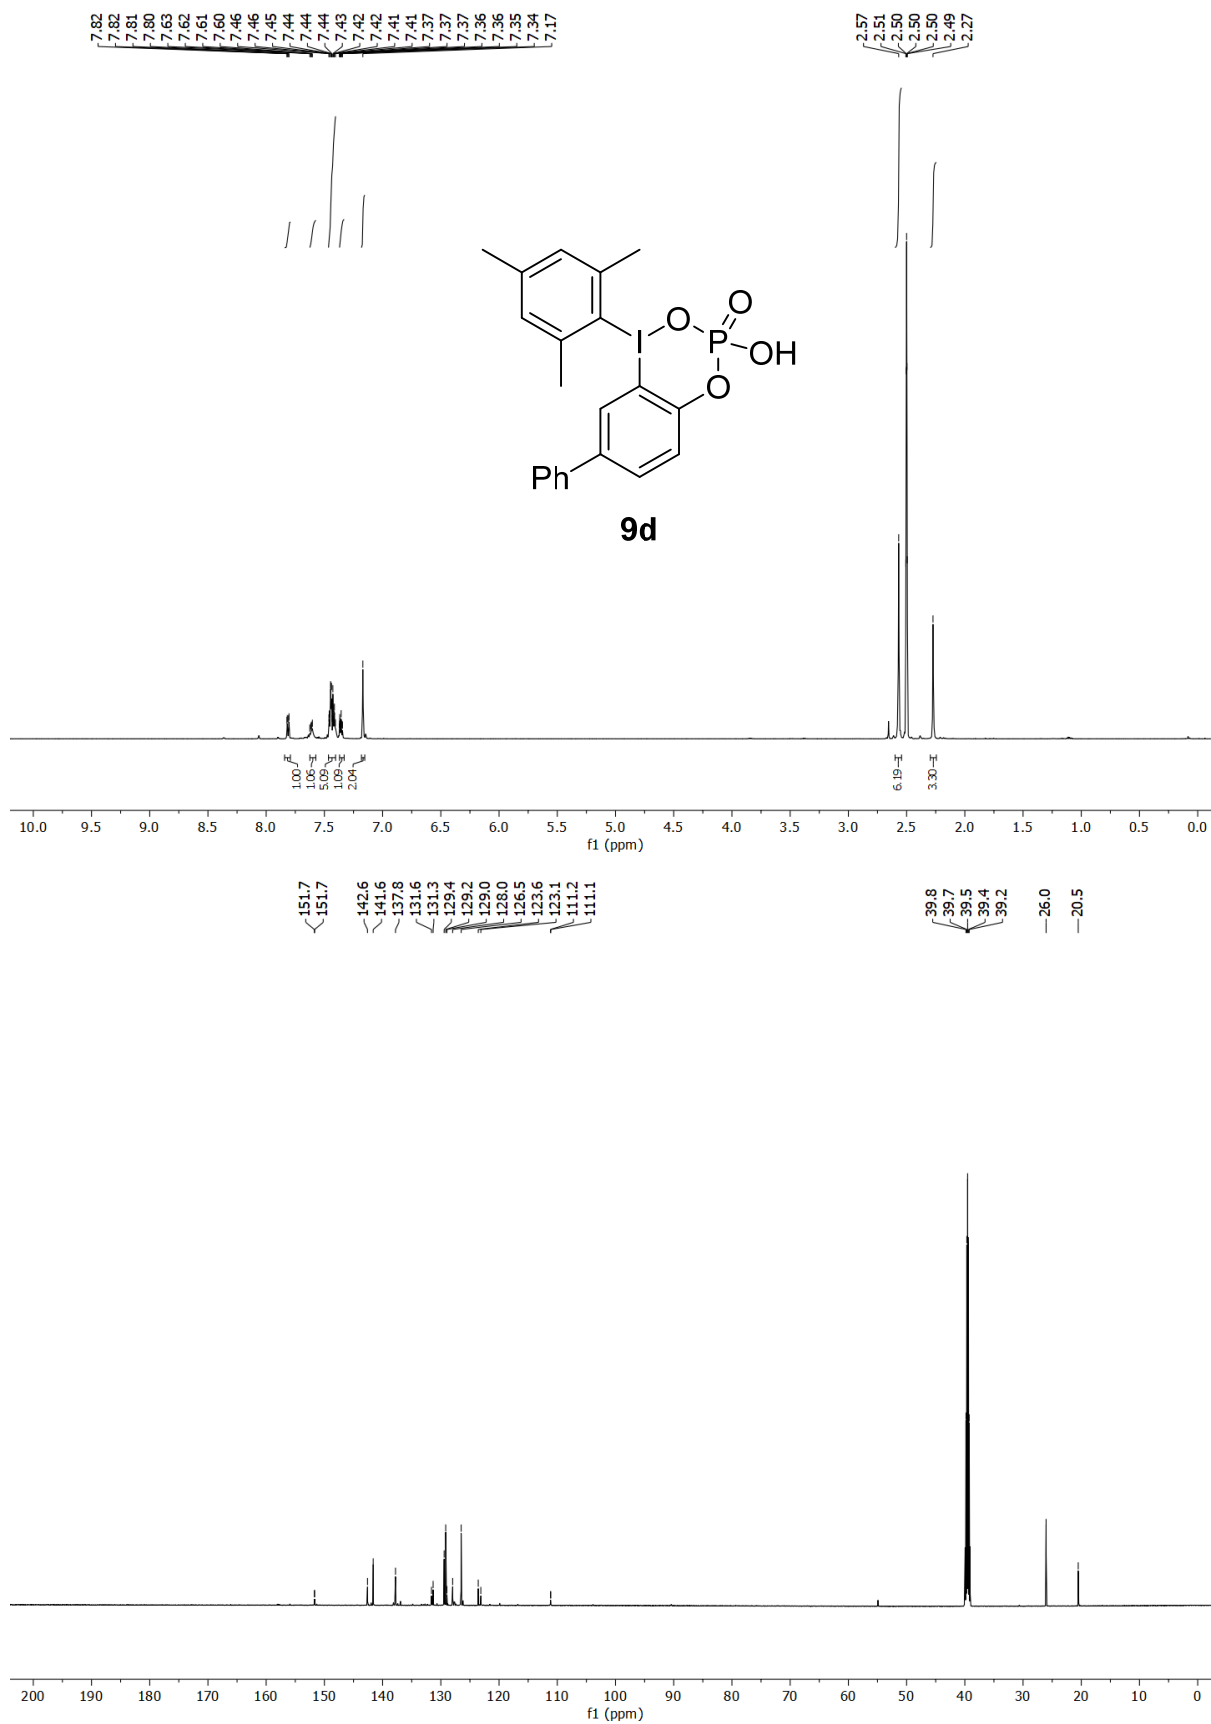

Figure 25: 601 MHz <sup>1</sup>H- and 151 MHz <sup>13</sup>C-NMR-spectrum of **9d** in DMSO-*d*<sub>6</sub>.

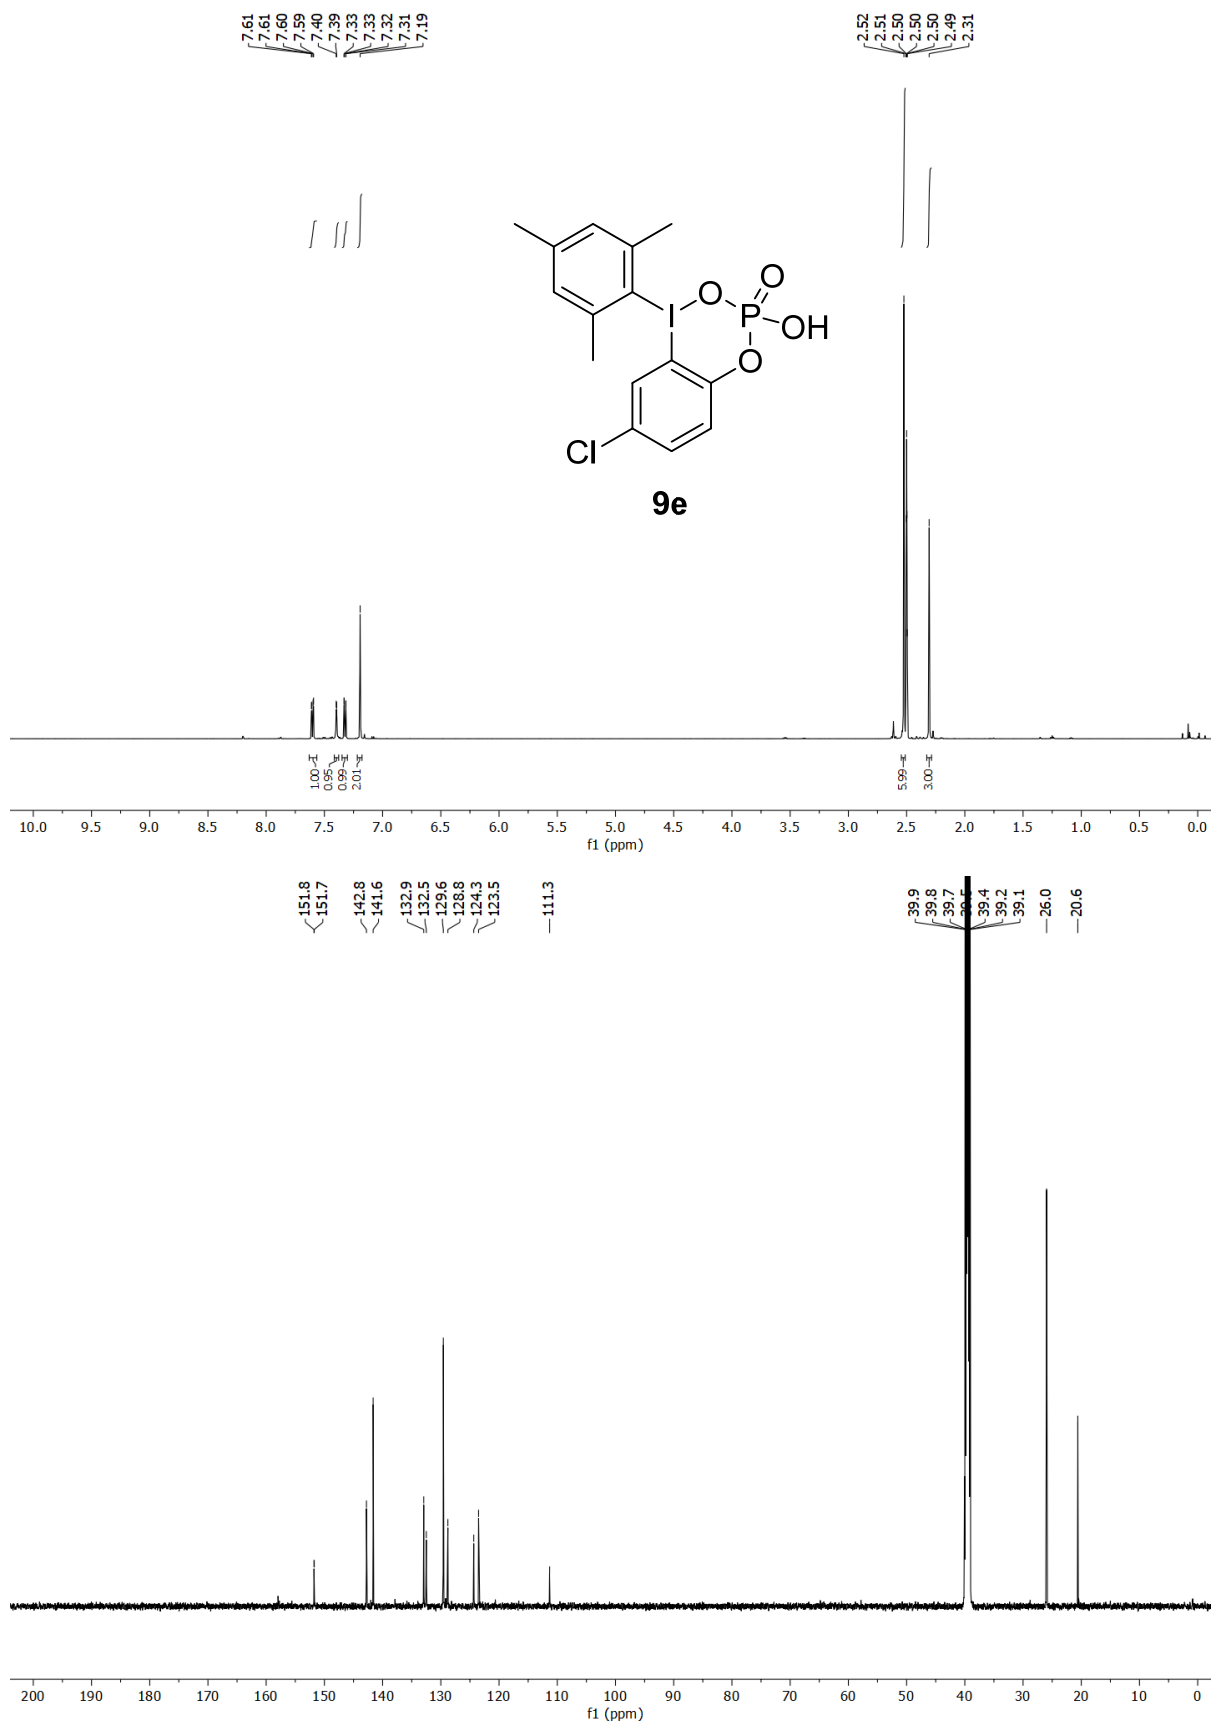

Figure 26: 601 MHz <sup>1</sup>H- and 151 MHz <sup>13</sup>C-NMR-spectrum of **9e** in DMSO-*d*<sub>6</sub>.



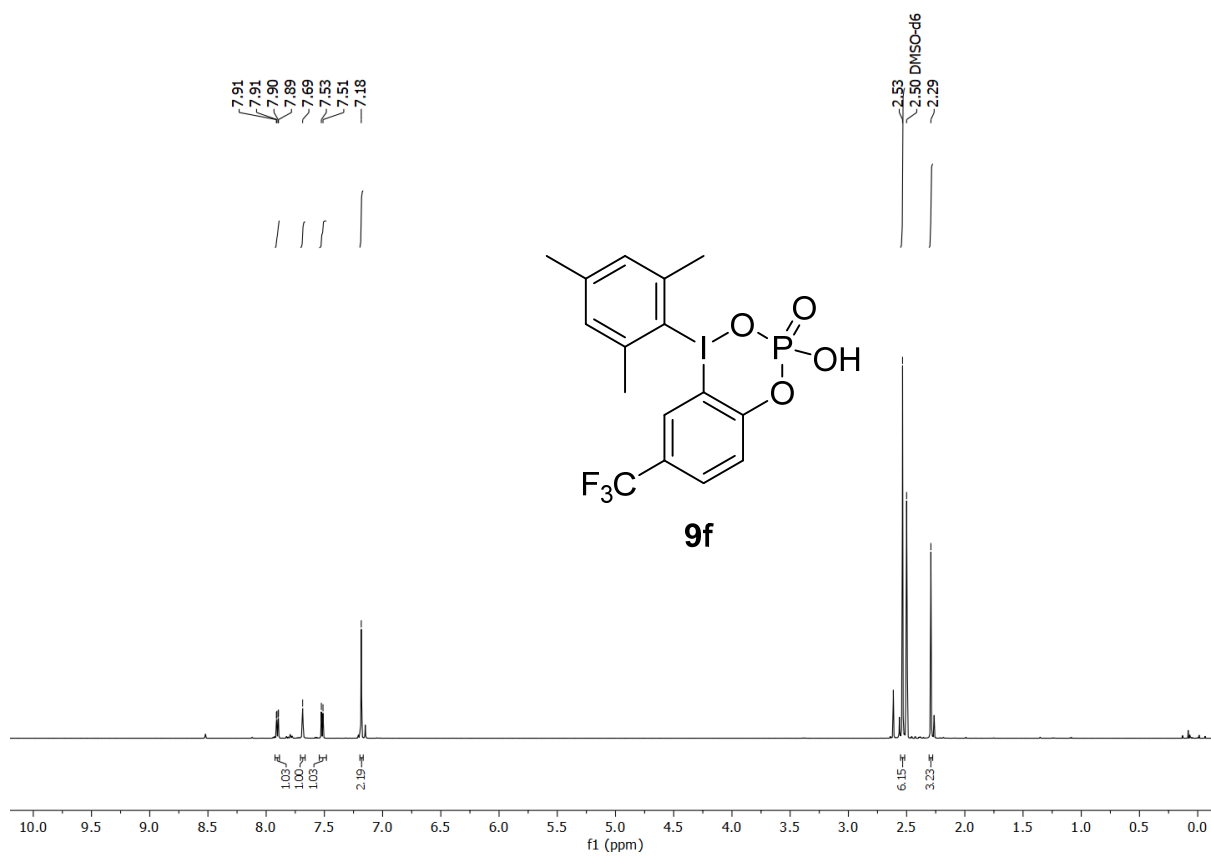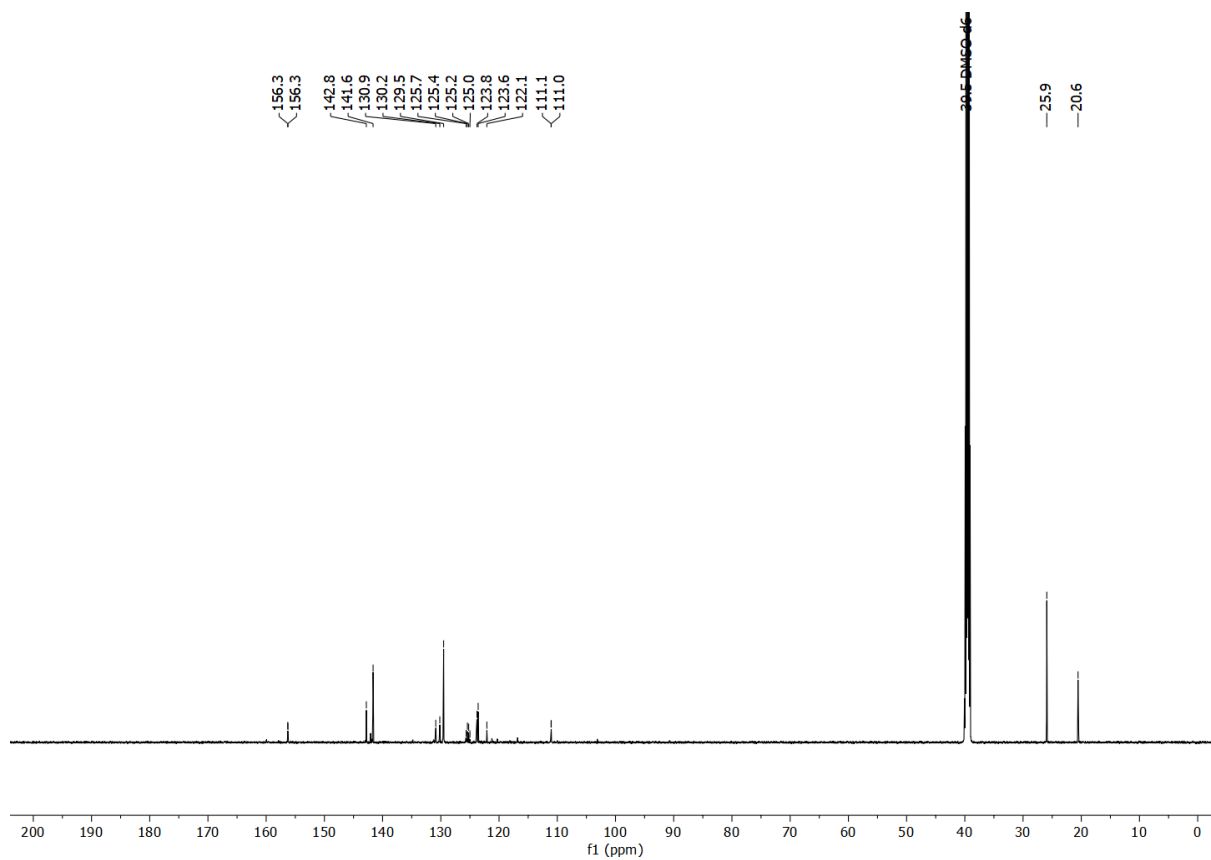

Figure 27: 601 MHz <sup>1</sup>H- and 151 MHz <sup>13</sup>C-NMR-spectrum of **9f** in DMSO-d<sub>6</sub>.

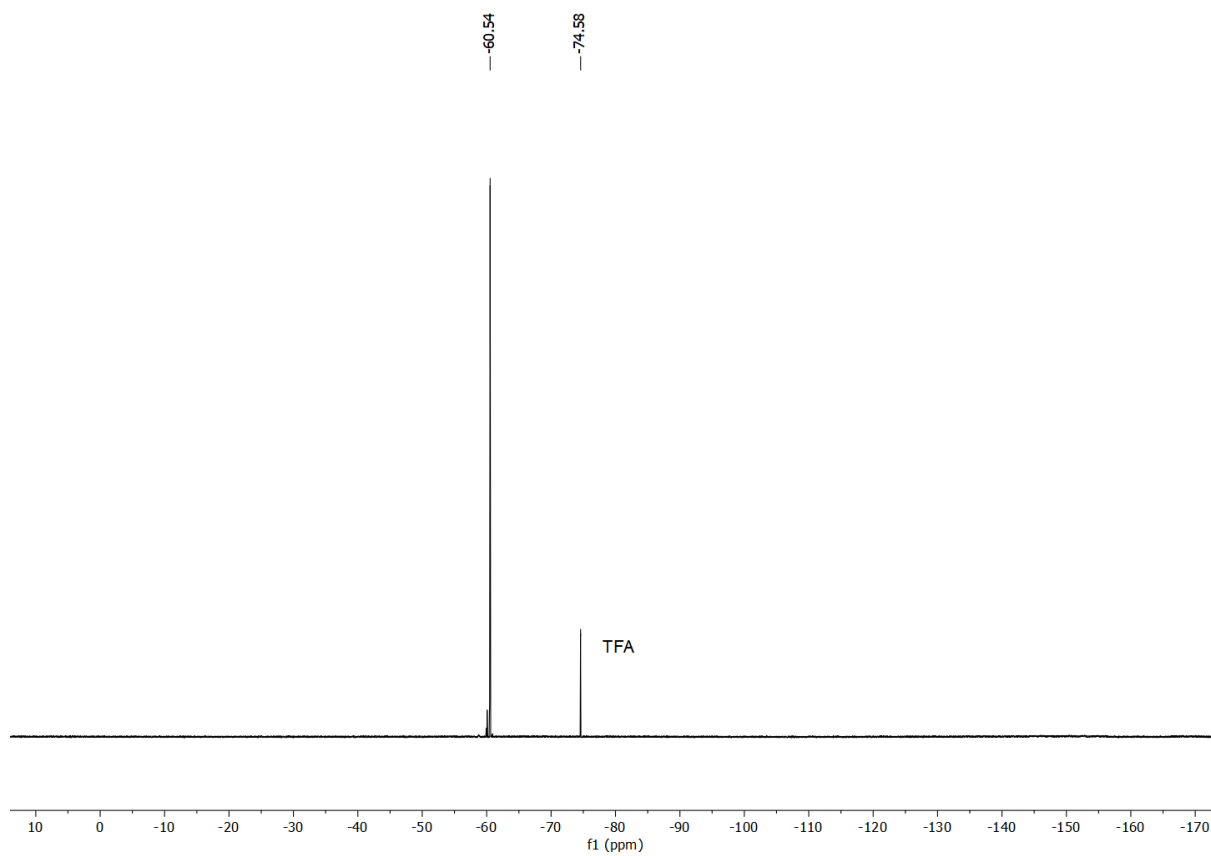

Figure 28: 565 MHz  $^{19}\text{F}$ -NMR-spectrum of 9f in DMSO- $d_6$ +TFA.

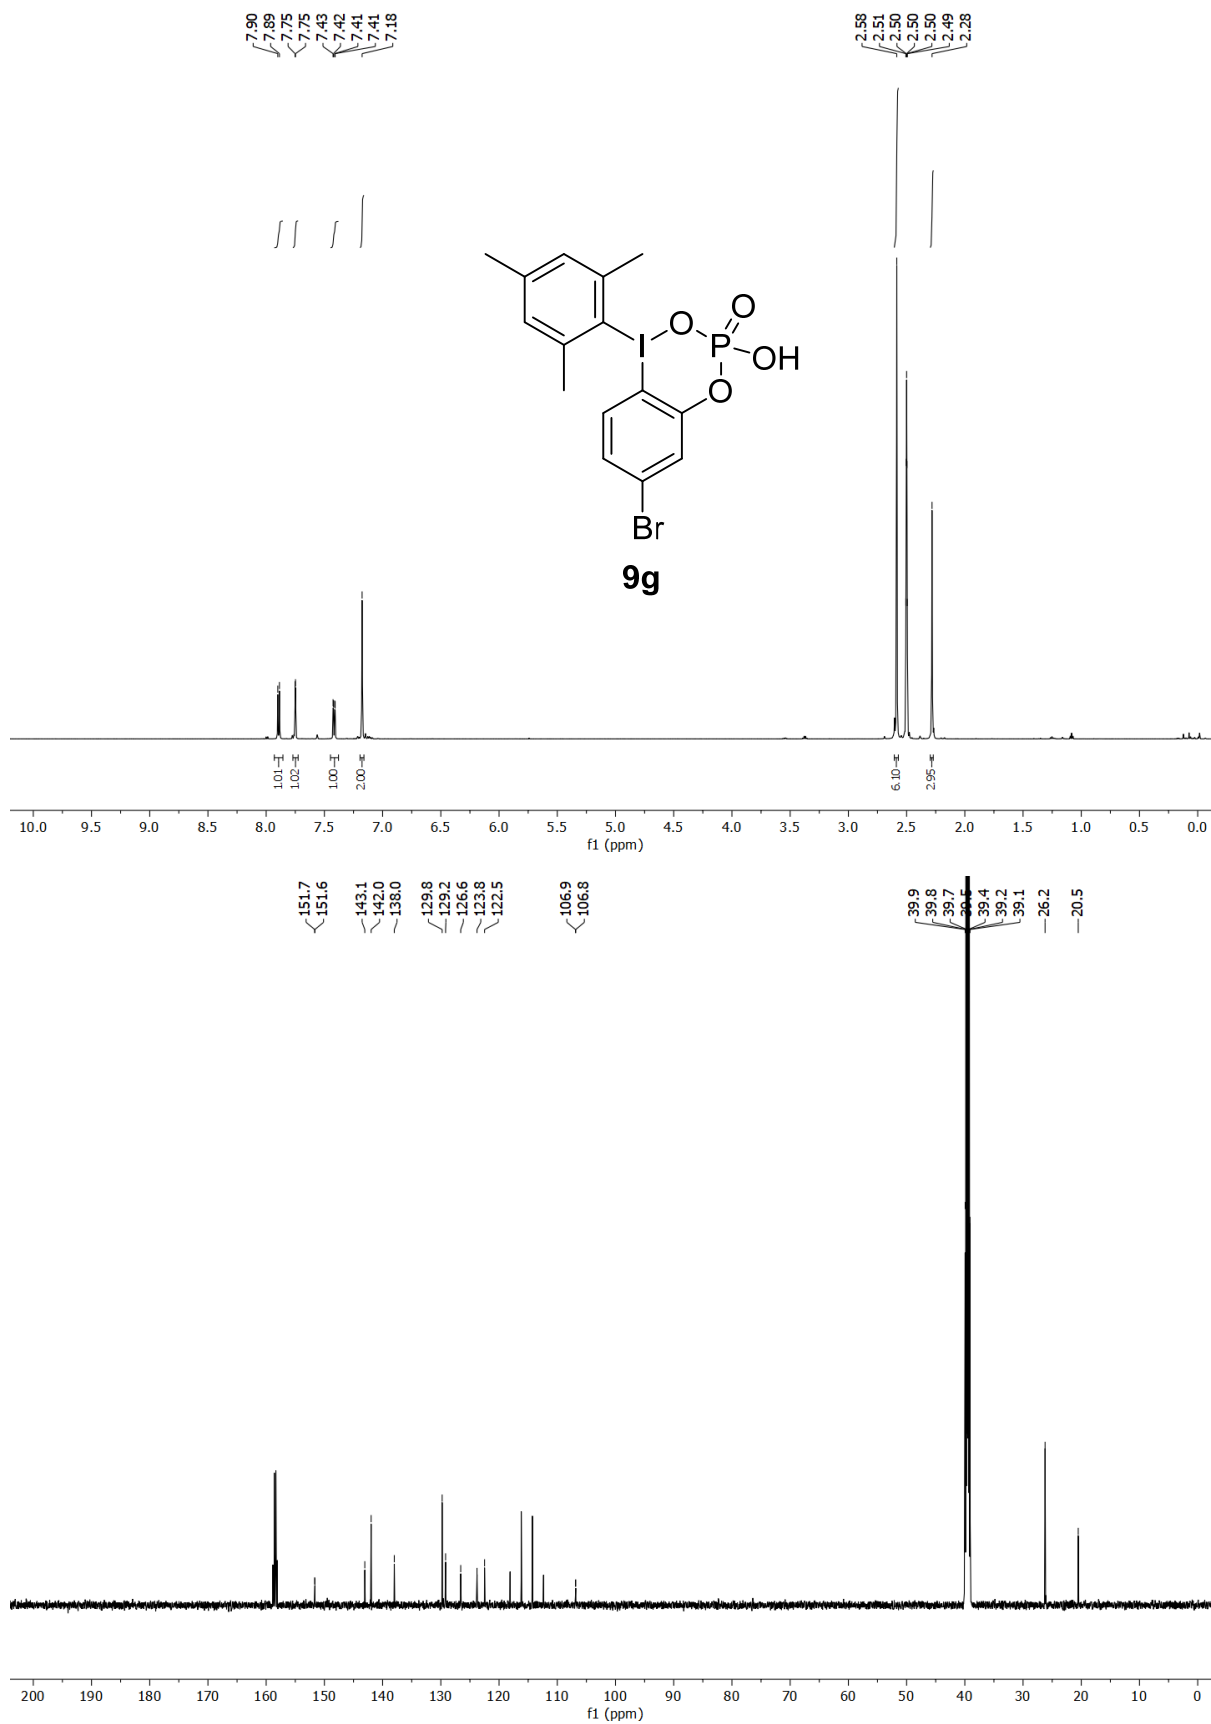

Figure 29: 601 MHz <sup>1</sup>H- and 151 MHz <sup>13</sup>C-NMR-spectrum of **9g** in DMSO-*d*<sub>6</sub>+TFA.

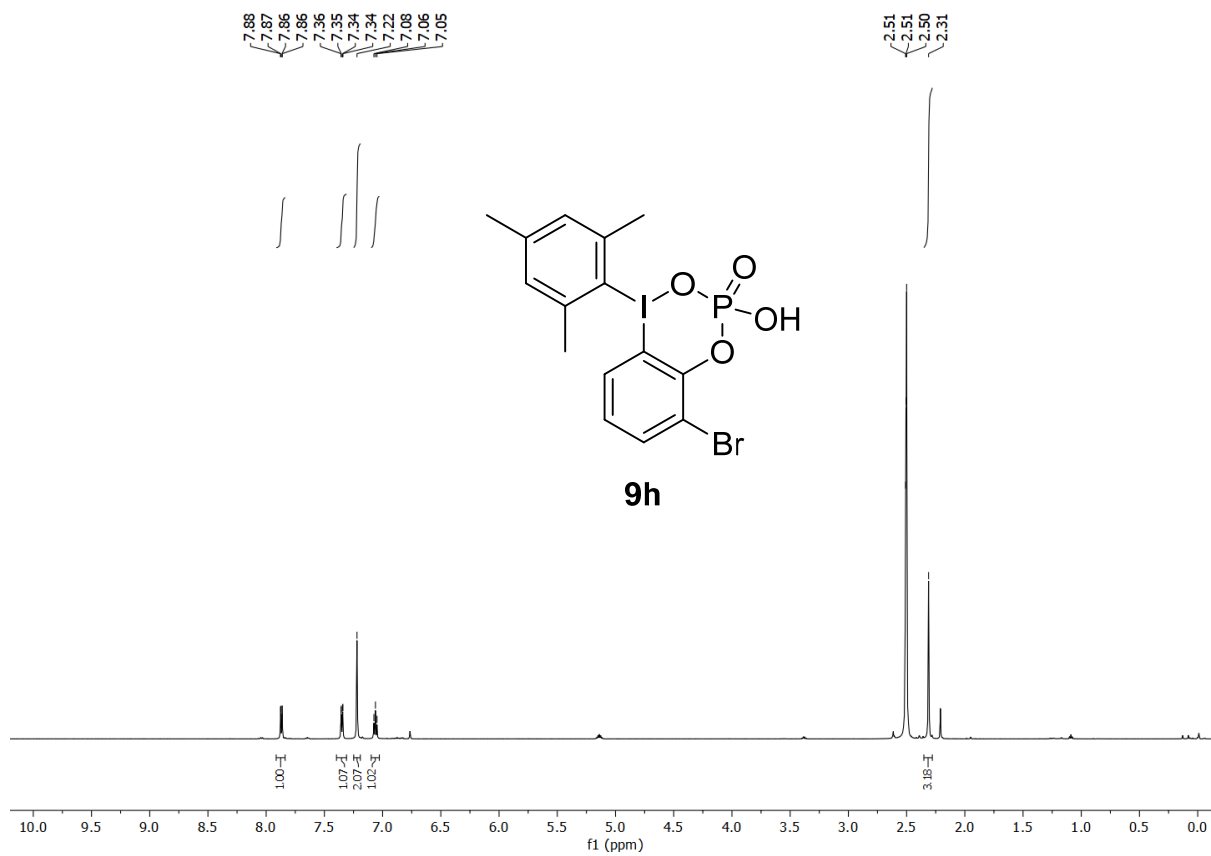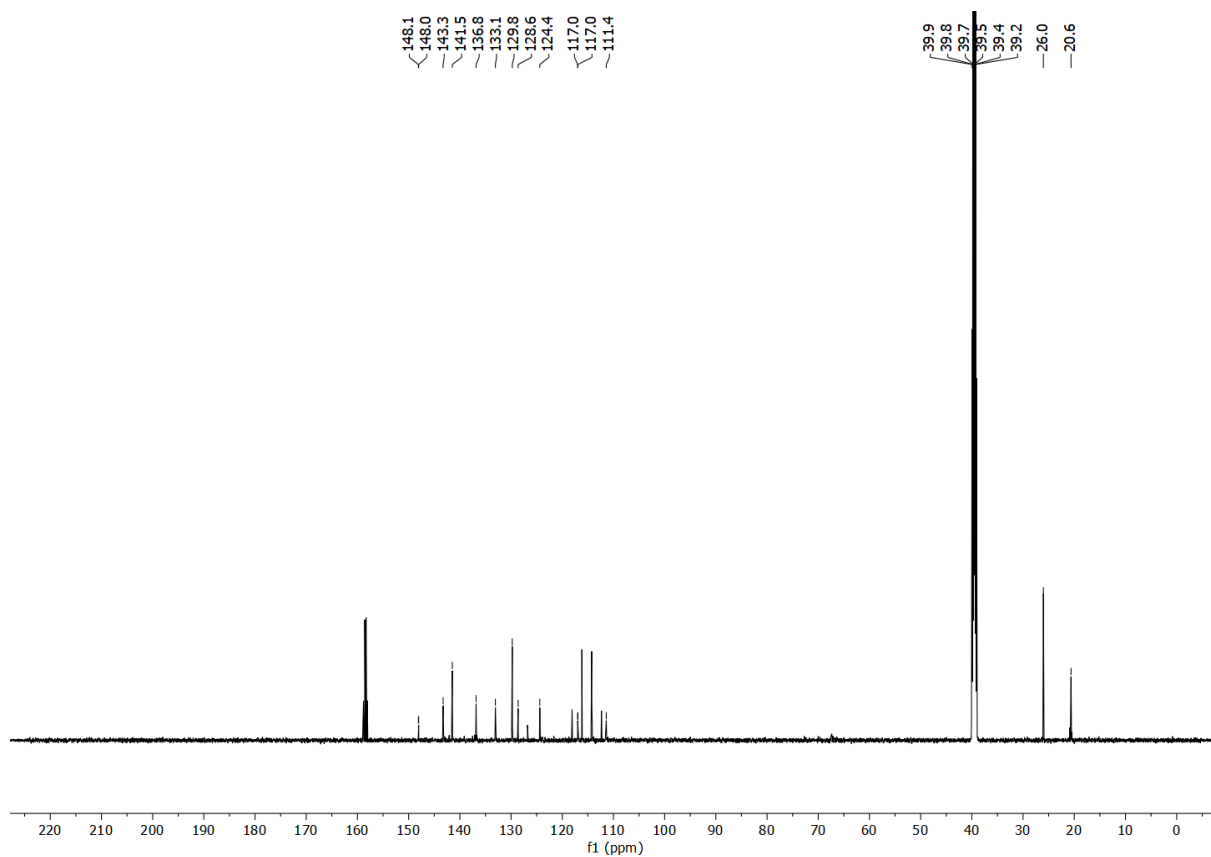

Figure 30: 601 MHz <sup>1</sup>H- and 151 MHz <sup>13</sup>C-NMR-spectrum of **9h** in DMSO-*d*<sub>6</sub>+TFA.

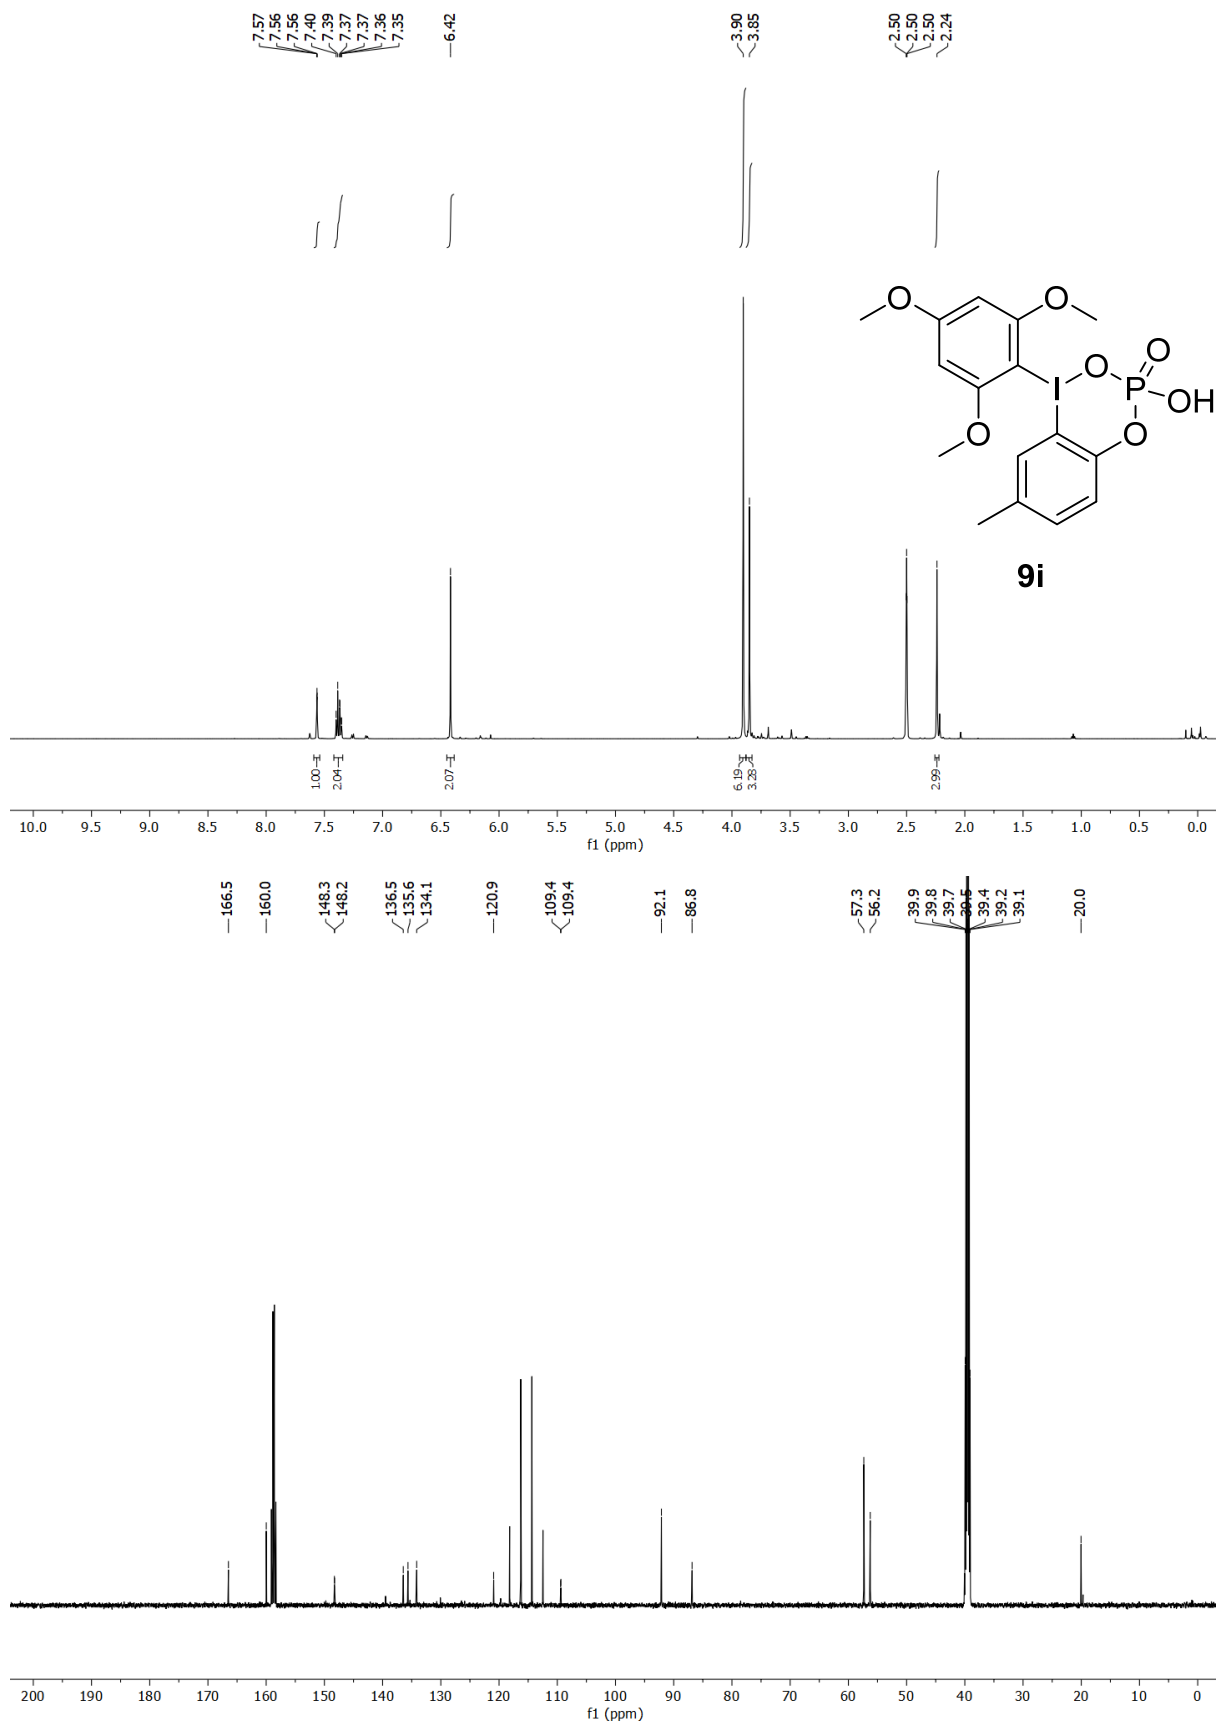

Figure 31: 601 MHz <sup>1</sup>H- and 151 MHz <sup>13</sup>C-NMR-spectrum of **9i** in DMSO-*d*<sub>6</sub>+TFA.

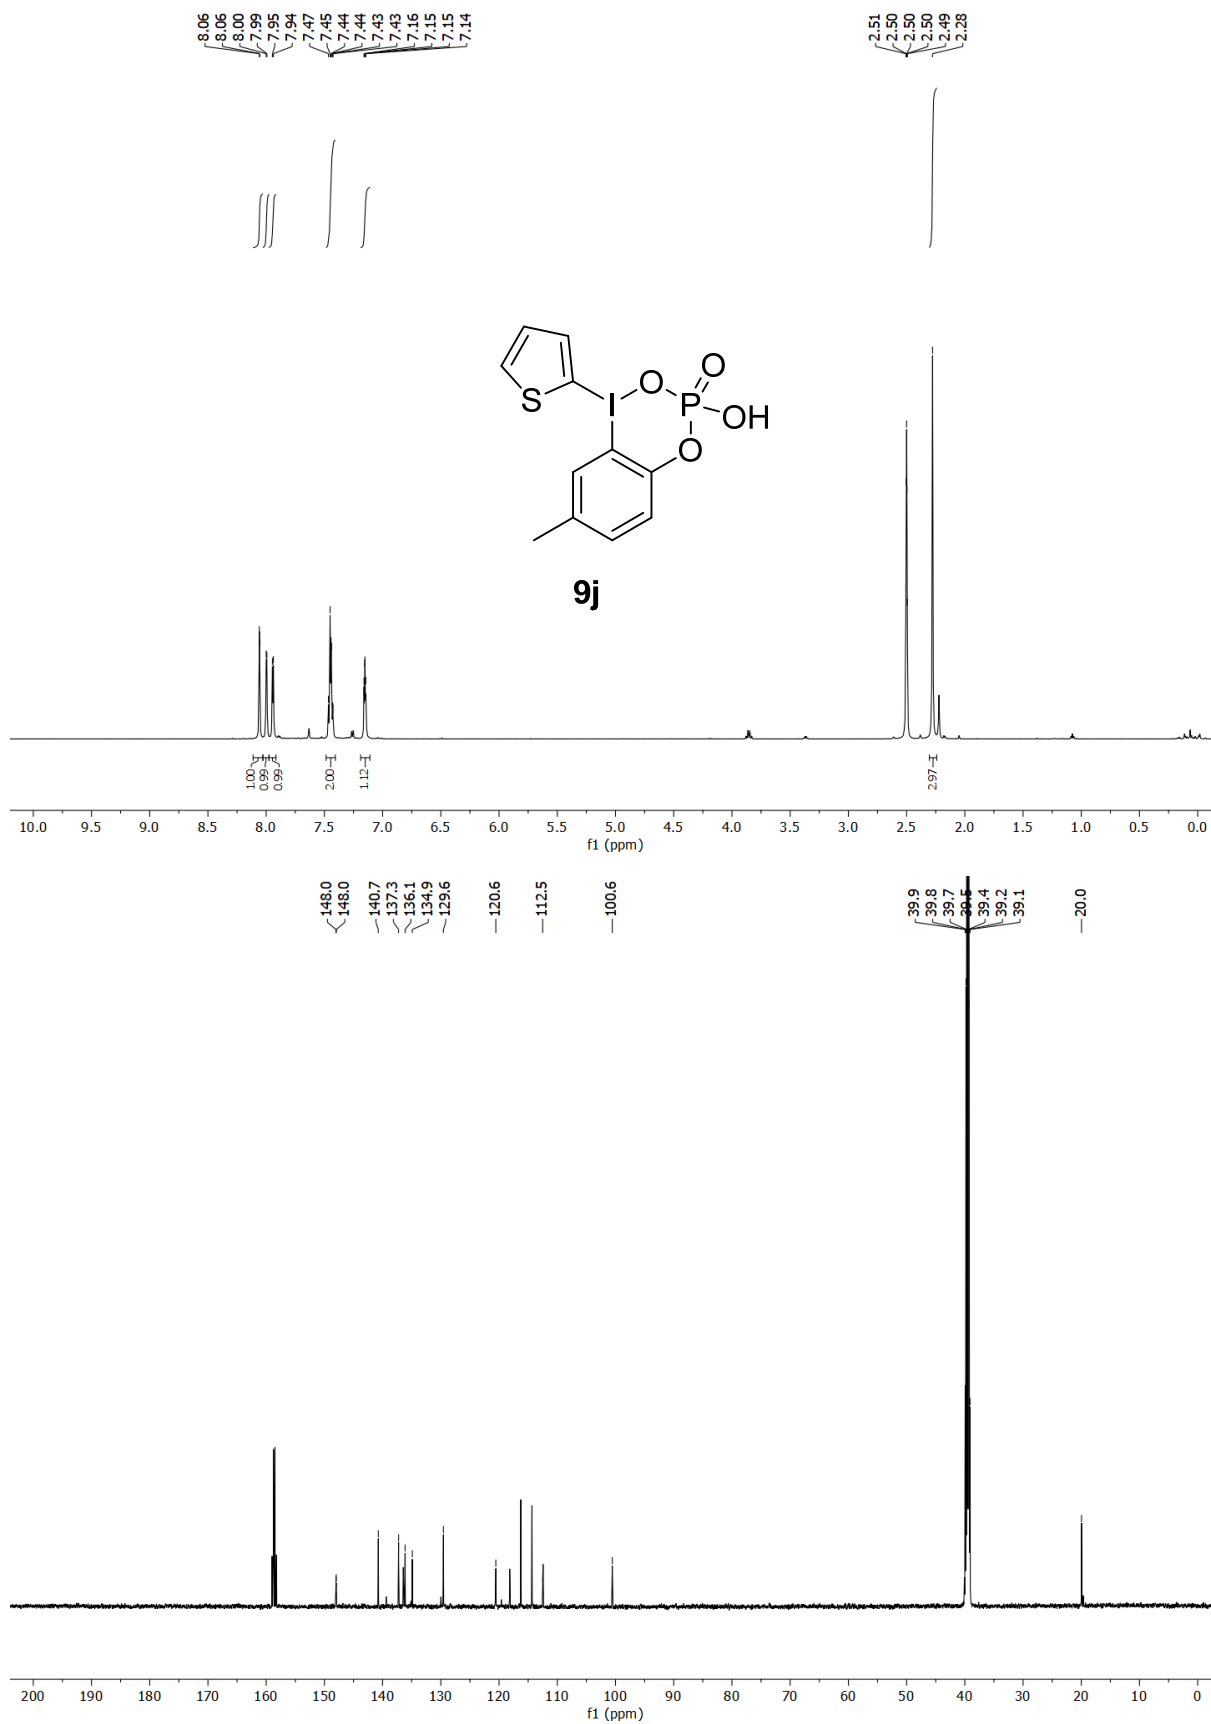

Figure 32: 601 MHz <sup>1</sup>H- and 151 MHz <sup>13</sup>C-NMR-spectrum of **9j** in DMSO-*d*<sub>6</sub>+TFA.

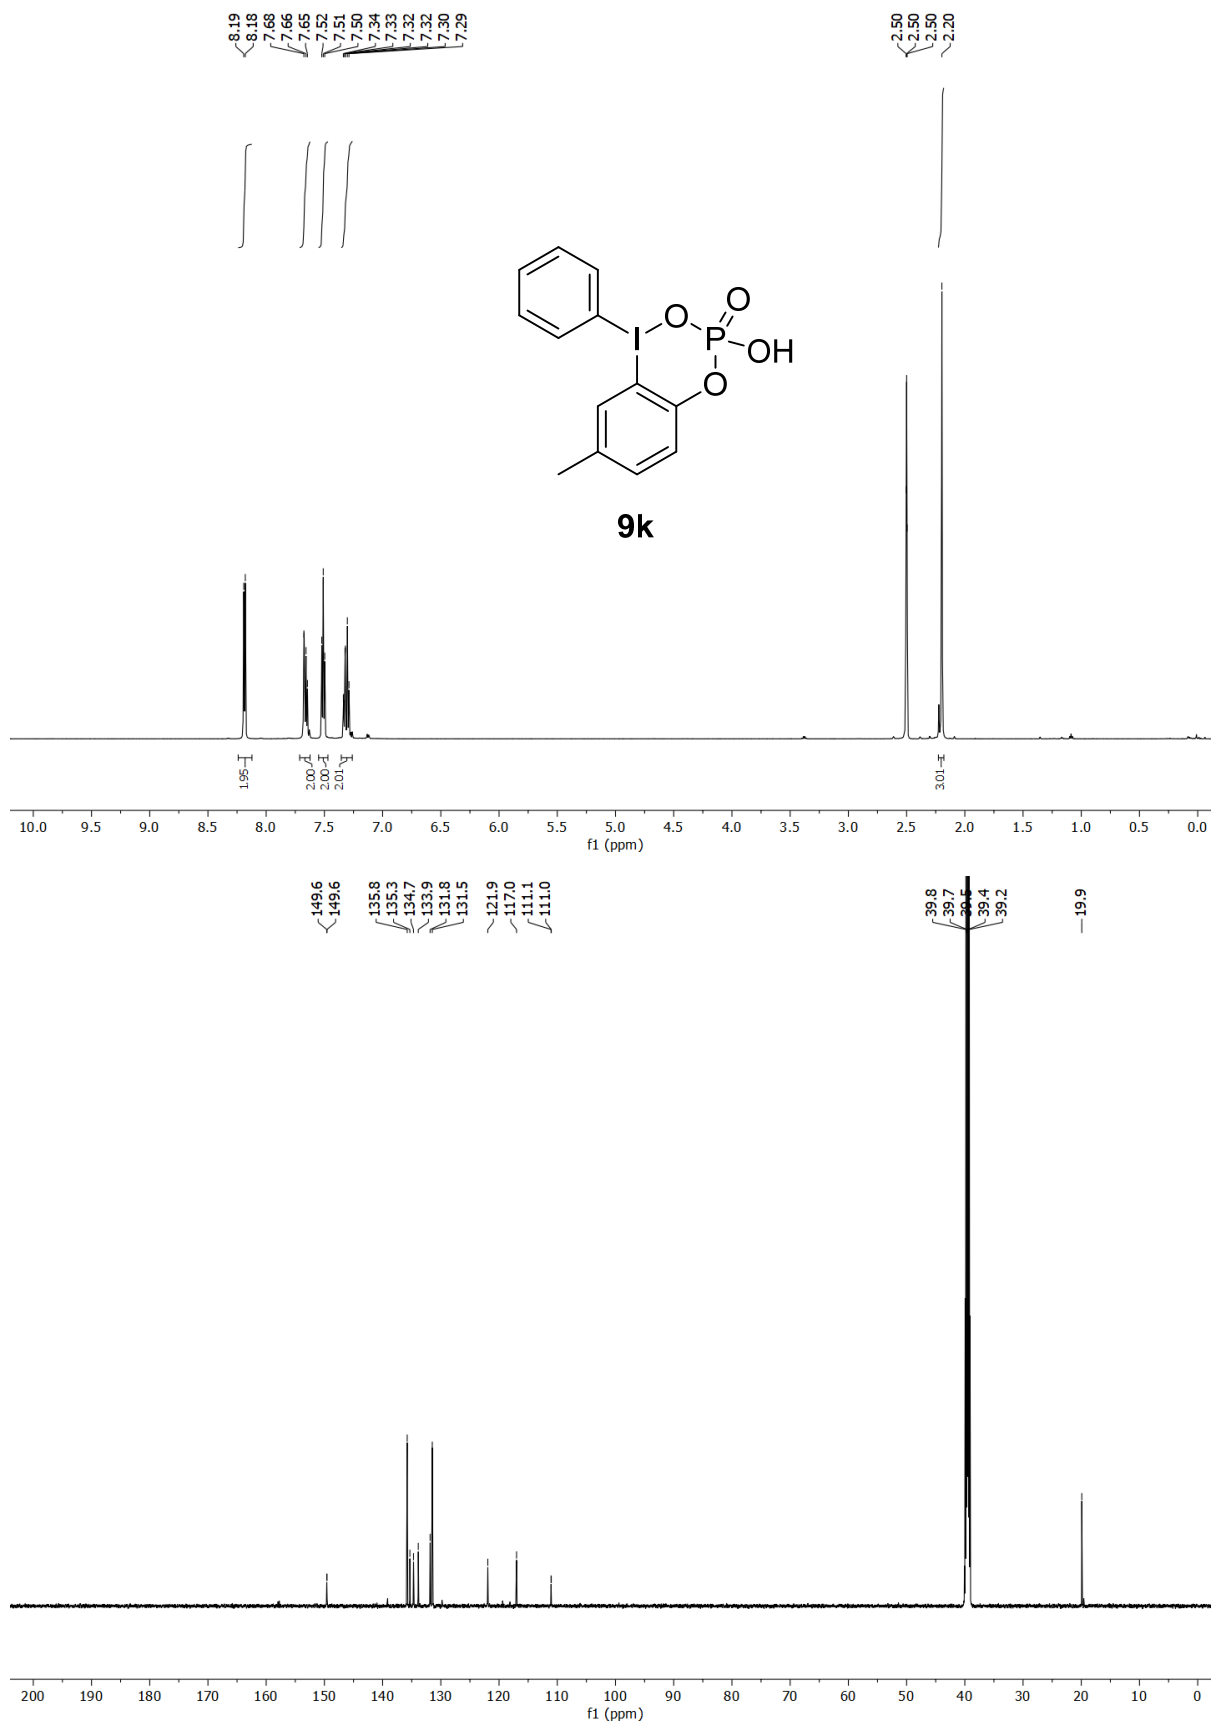

Figure 33: 601 MHz <sup>1</sup>H- and 151 MHz <sup>13</sup>C-NMR-spectrum of **9k** in DMSO-*d*<sub>6</sub>.

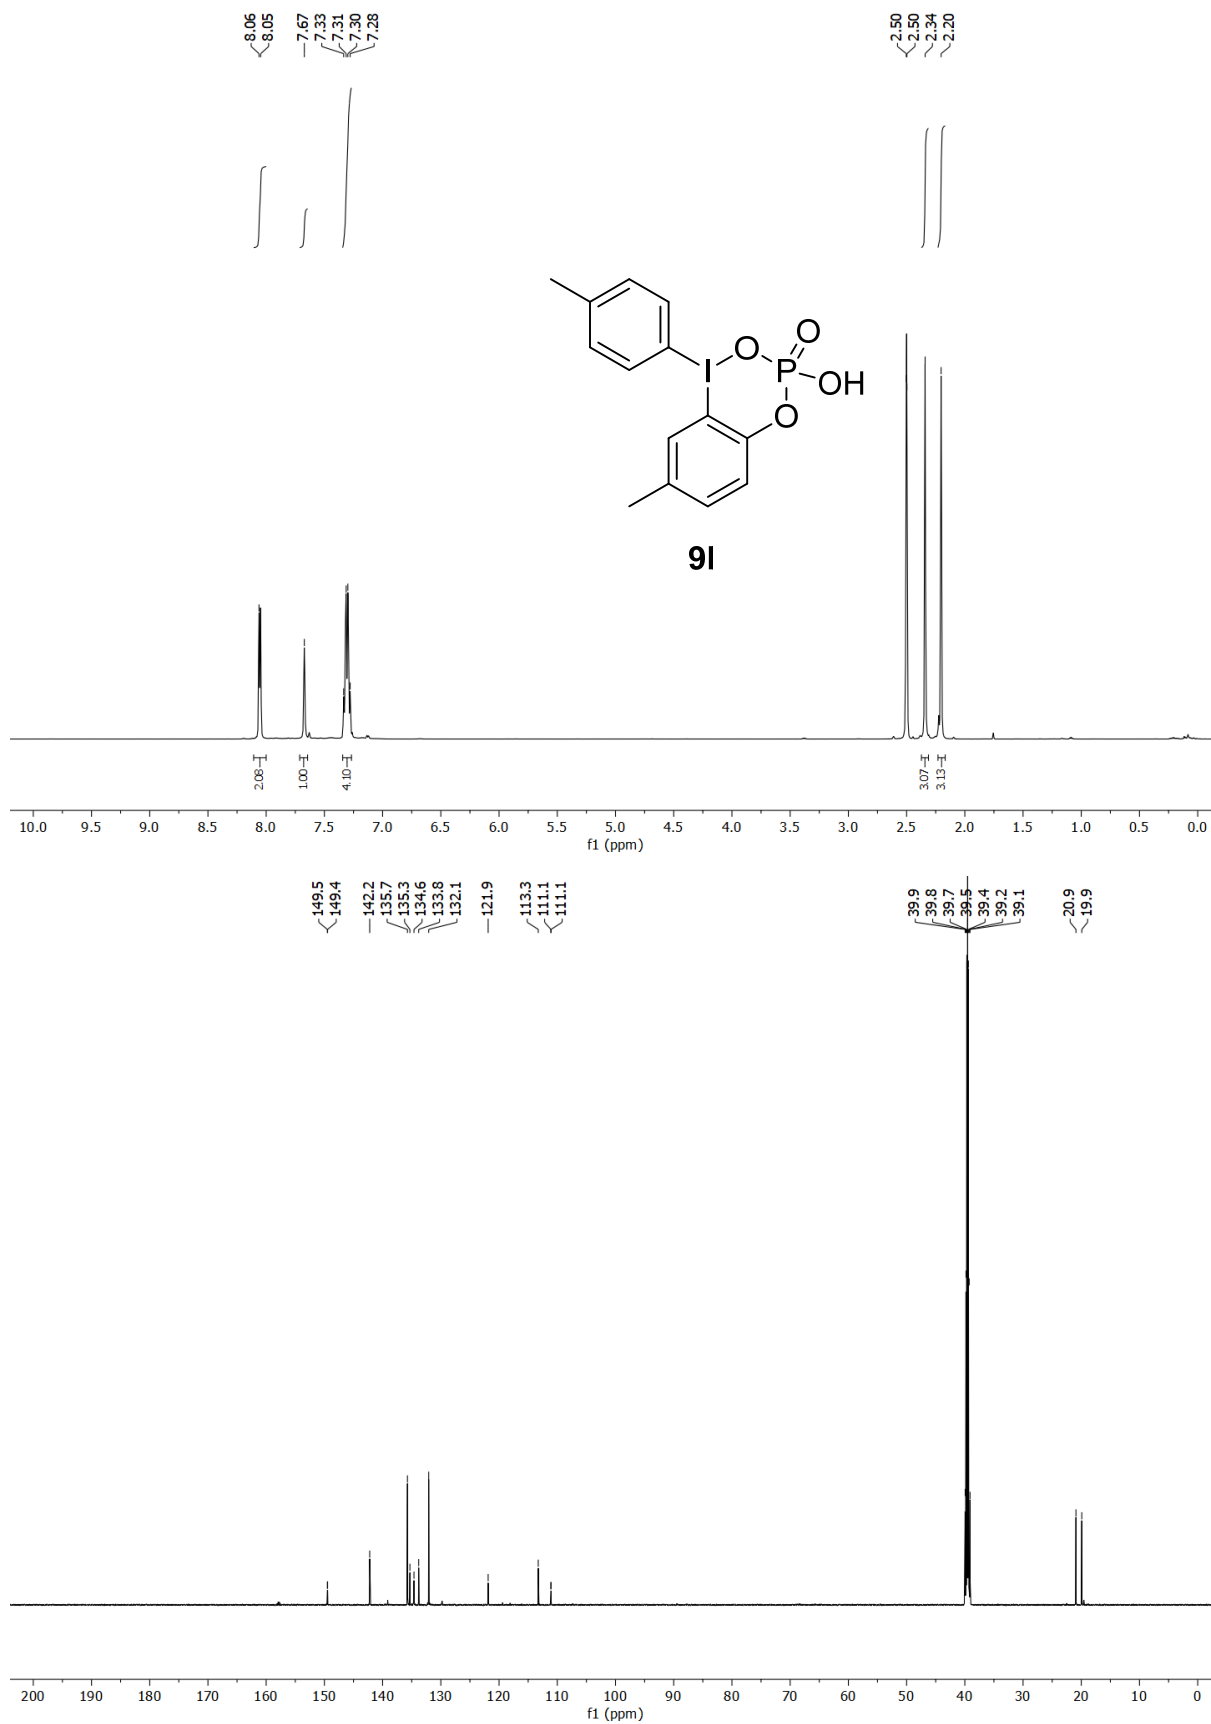

Figure 34: 601 MHz <sup>1</sup>H- and 151 MHz <sup>13</sup>C-NMR-spectrum of **9I** in DMSO-*d*<sub>6</sub>.



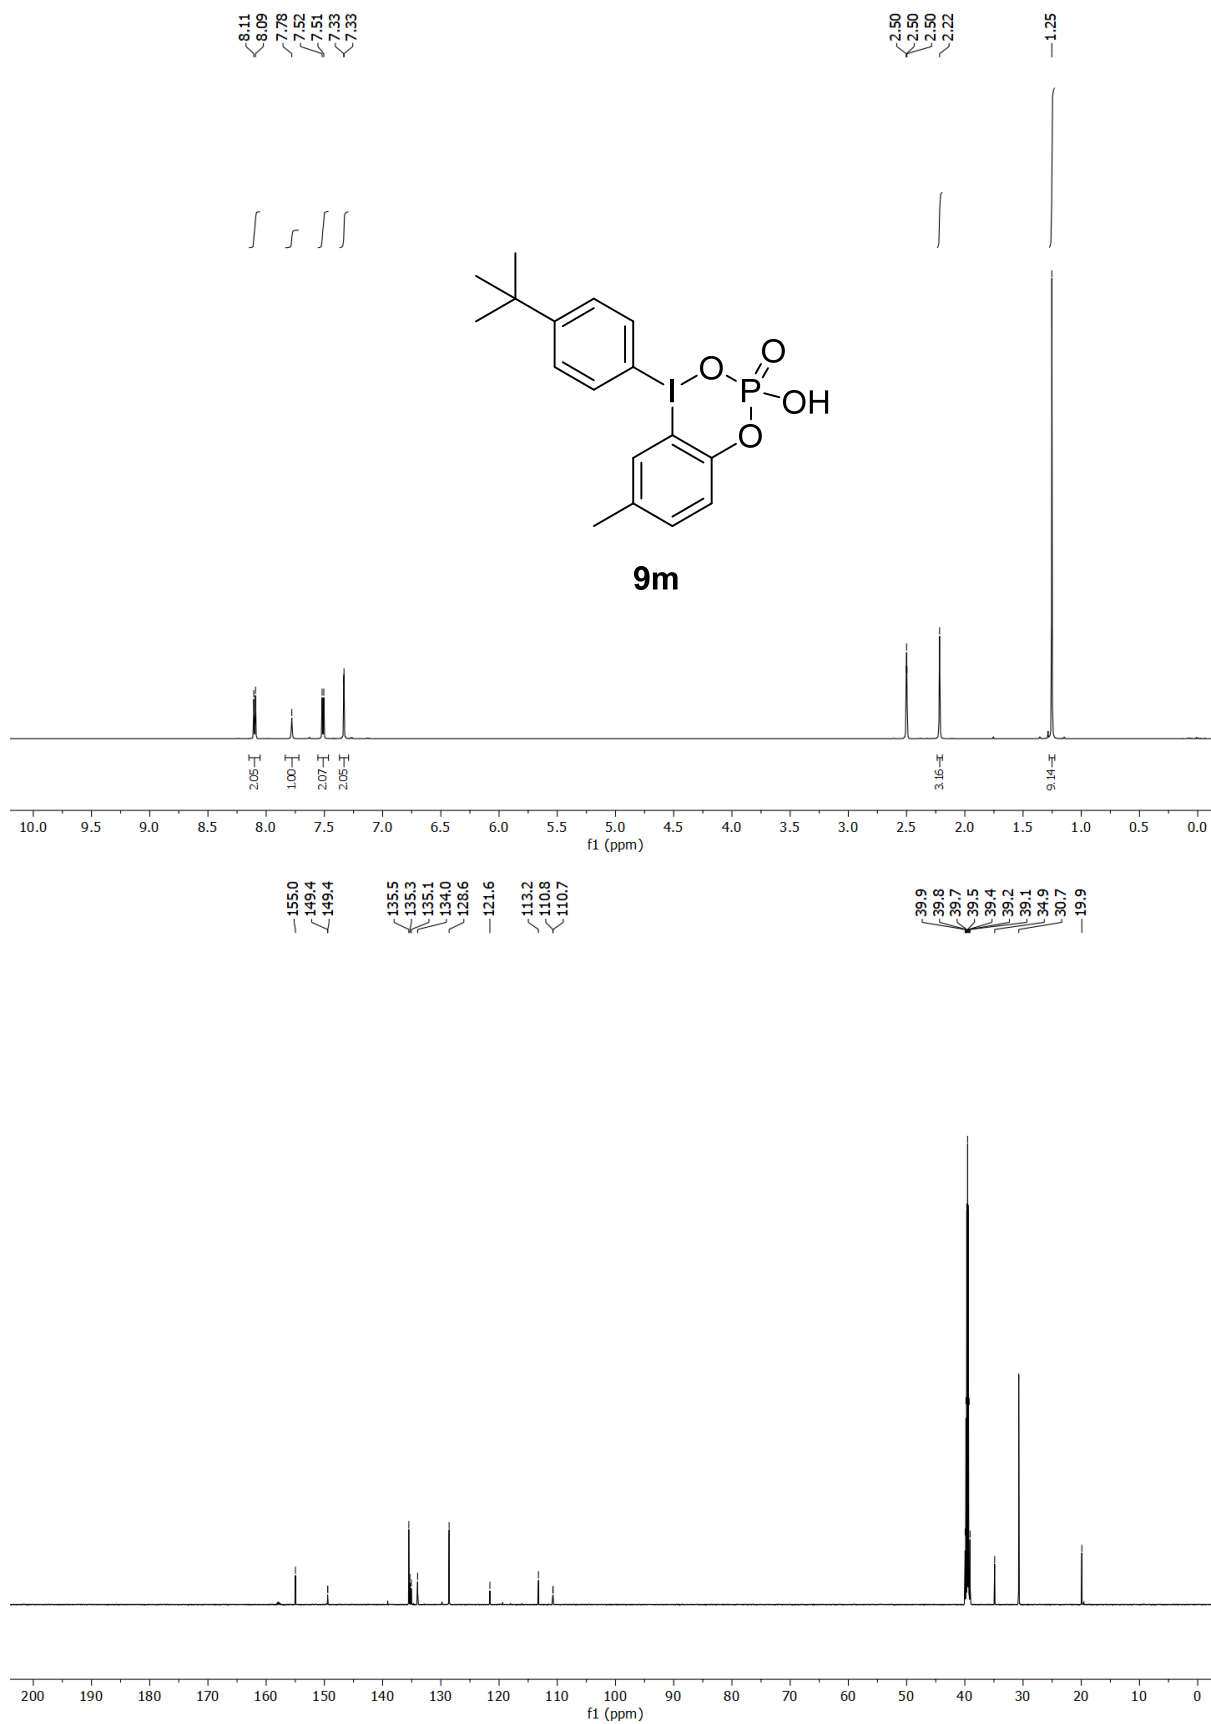

Figure 35: 600 MHz <sup>1</sup>H- and 151 MHz <sup>13</sup>C-NMR-spectrum of **9m** in DMSO-*d*<sub>6</sub>.

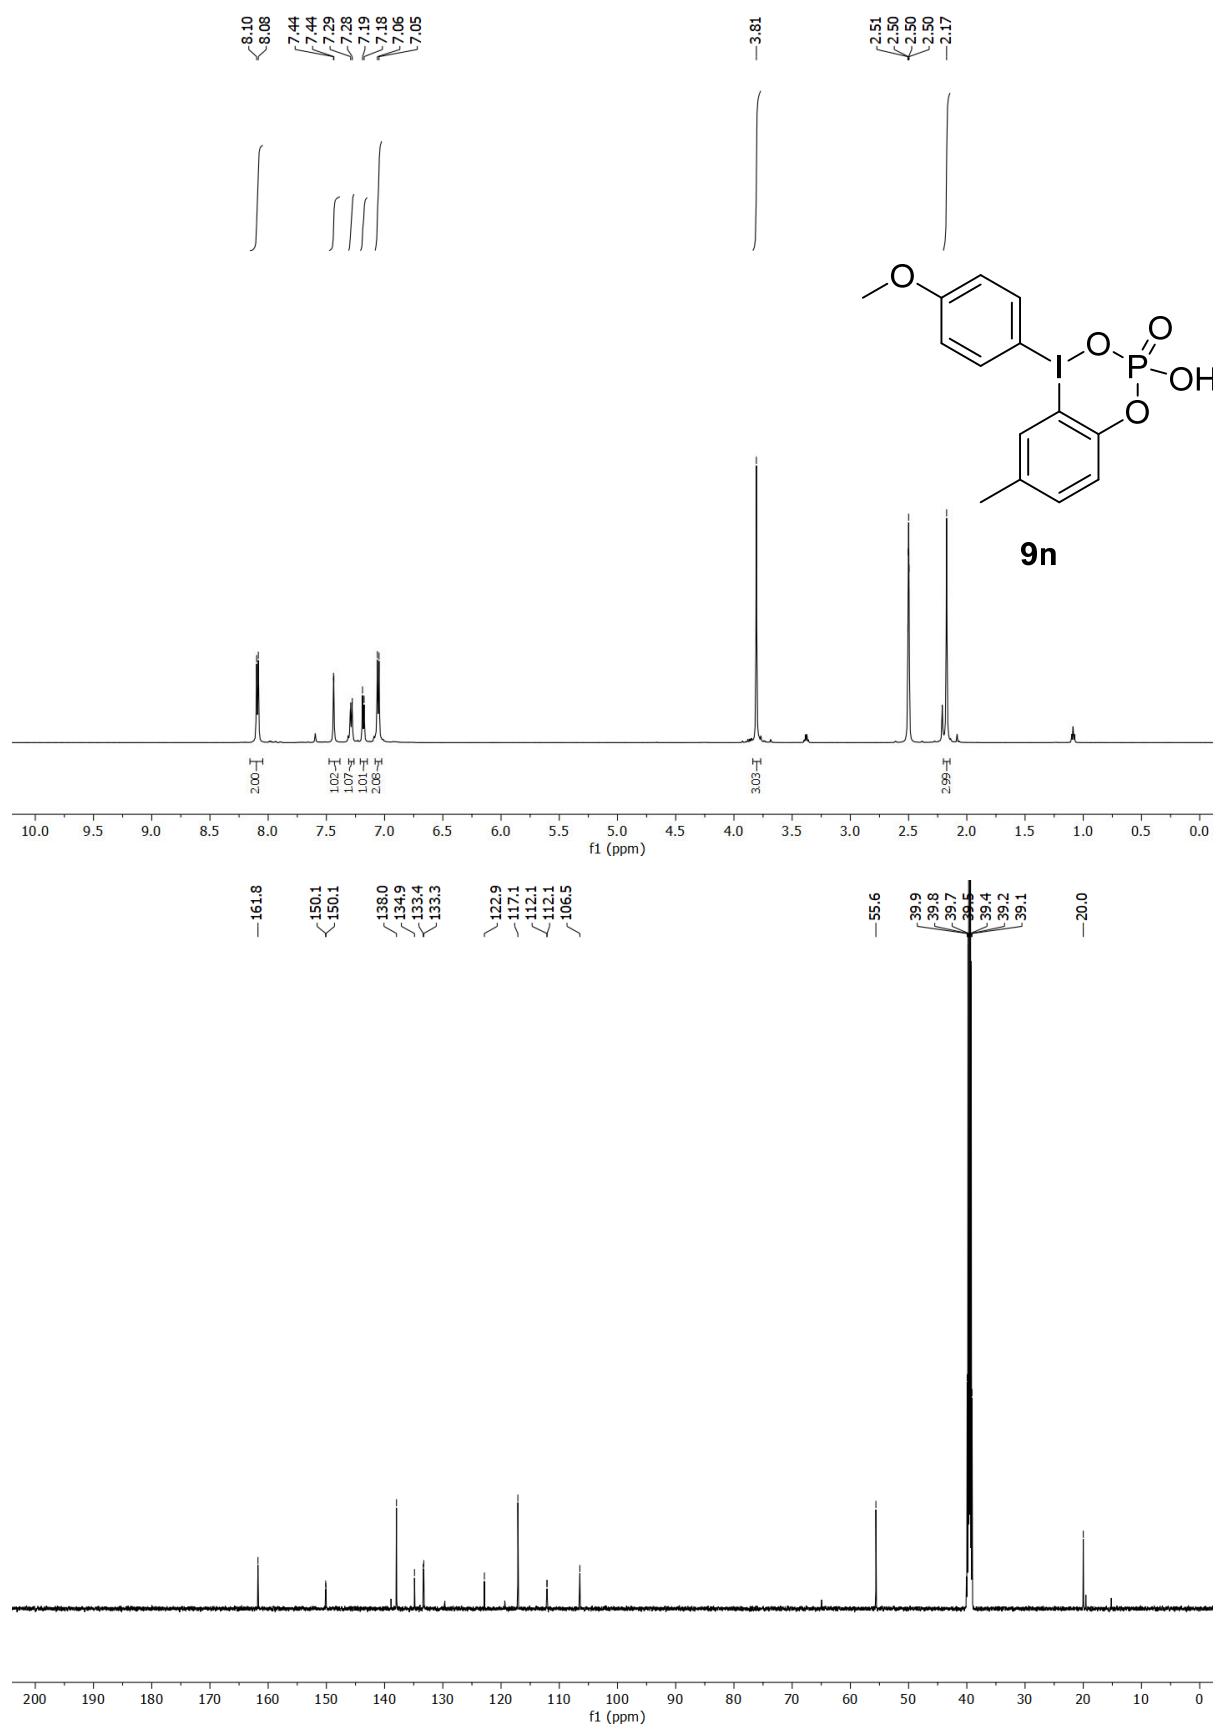

Figure 36: 600 MHz <sup>1</sup>H- and 151 MHz <sup>13</sup>C-NMR-spectrum of **9n** in DMSO-*d*<sub>6</sub>.

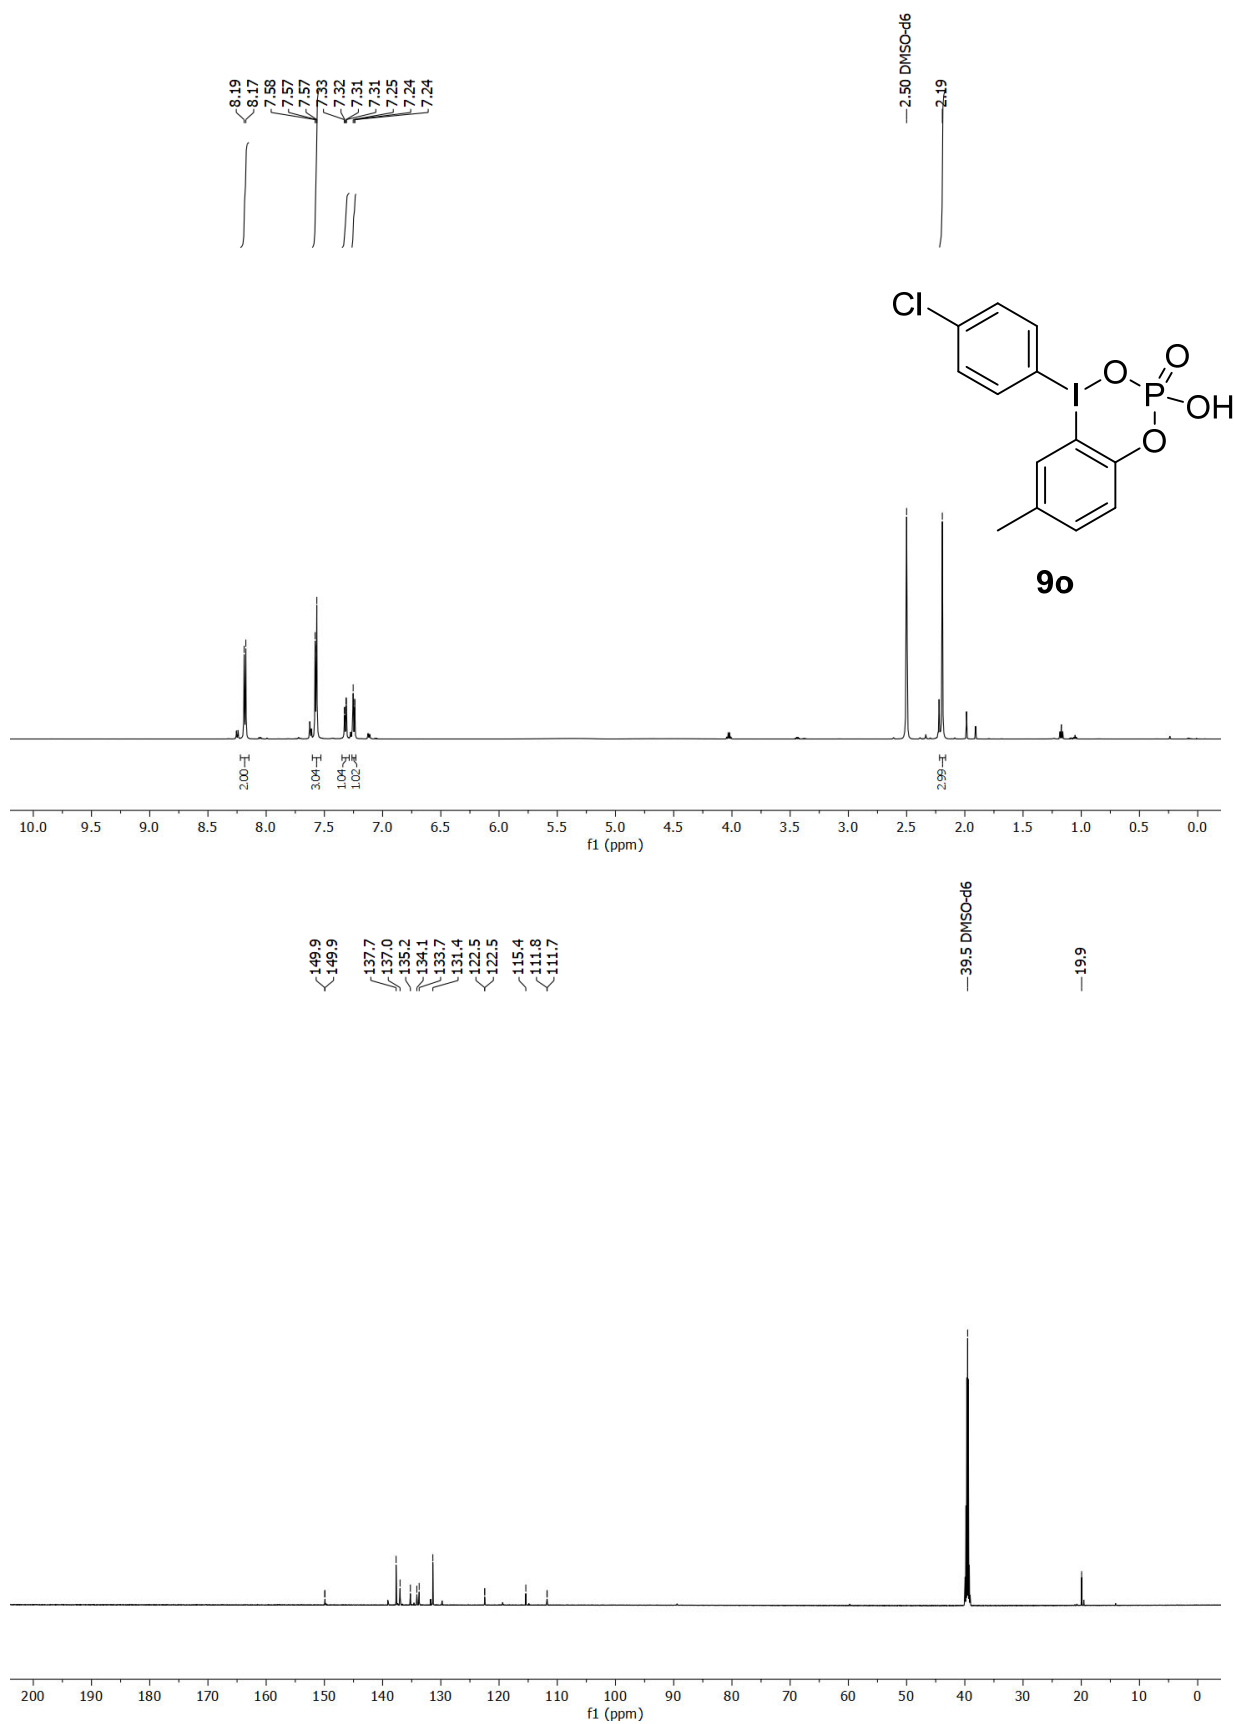

Figure 37: 600 MHz <sup>1</sup>H- and 151 MHz <sup>13</sup>C-NMR-spectrum of **9o** in DMSO-*d*<sub>6</sub>.

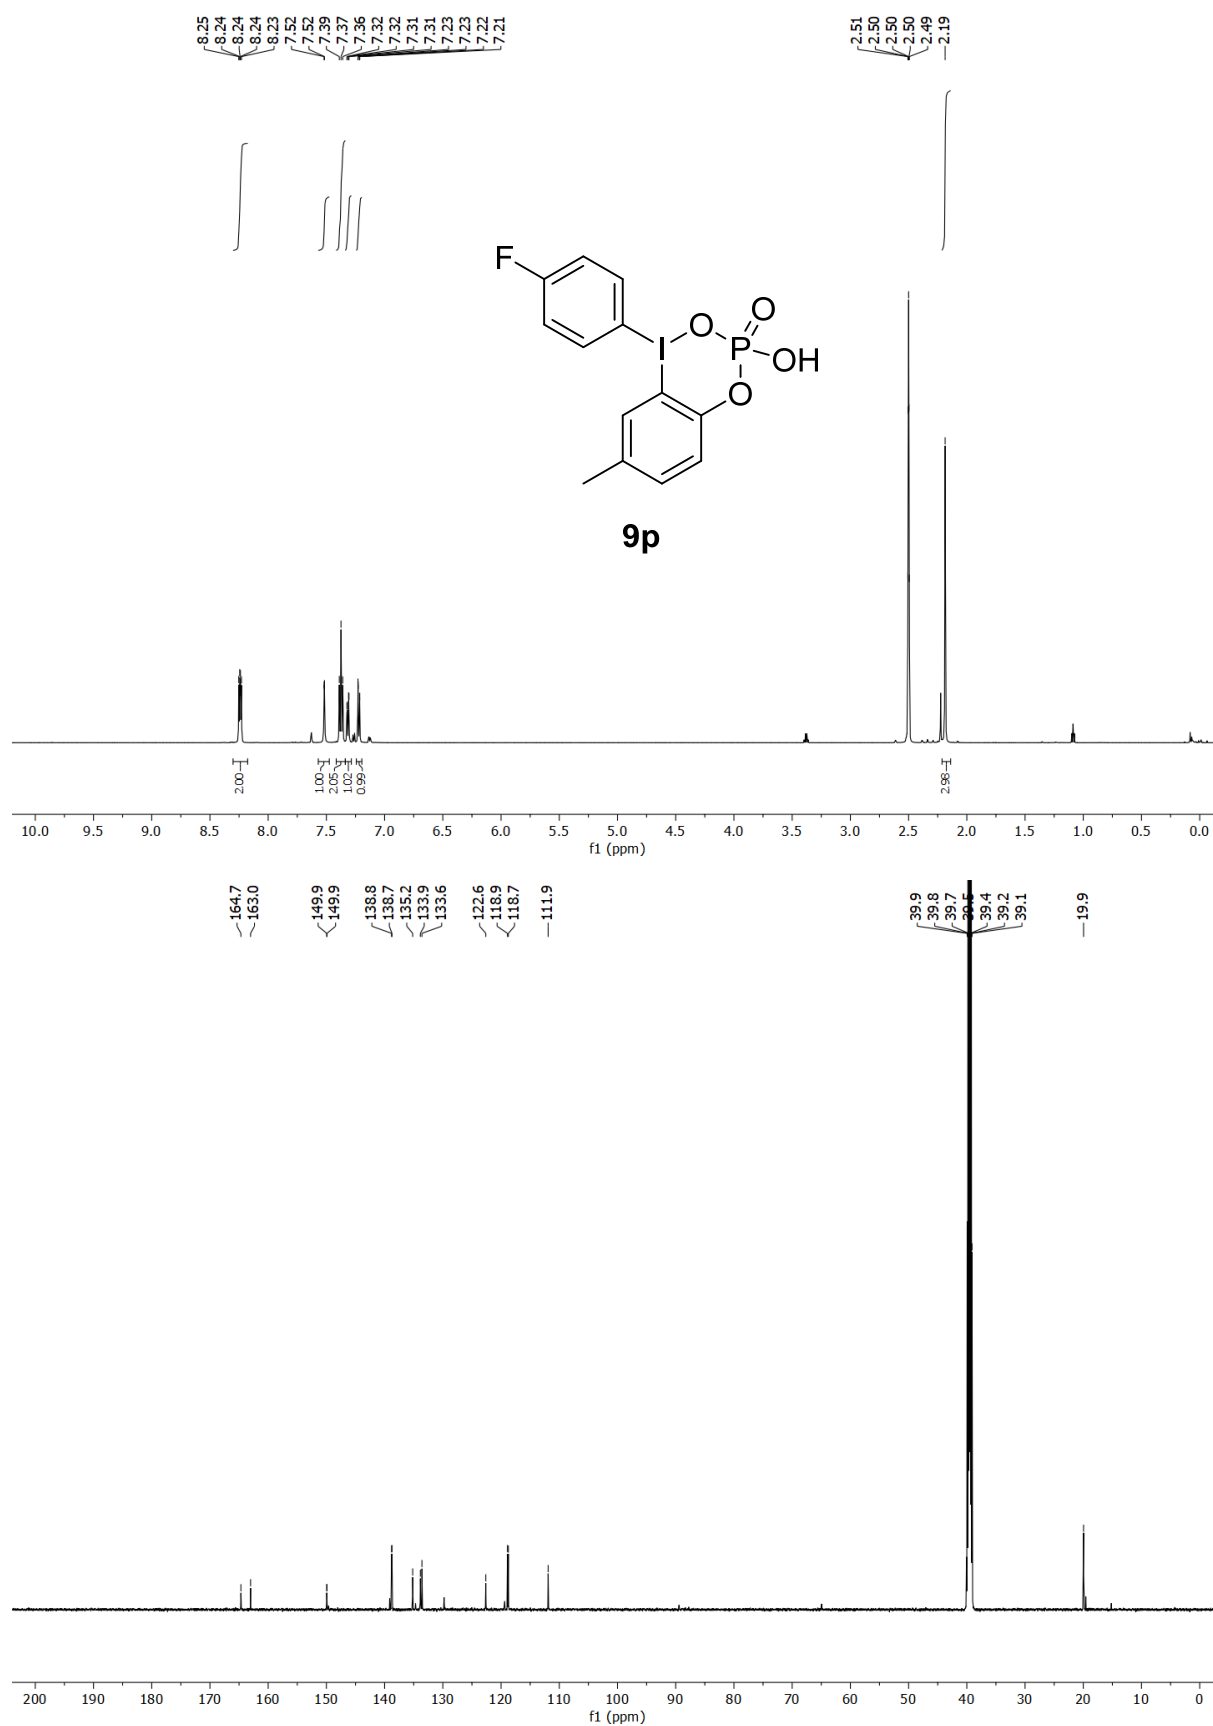

Figure 38: 600 MHz <sup>1</sup>H- and 151 MHz <sup>13</sup>C-NMR-spectrum of **9p** in DMSO-d<sub>6</sub>+TFA.

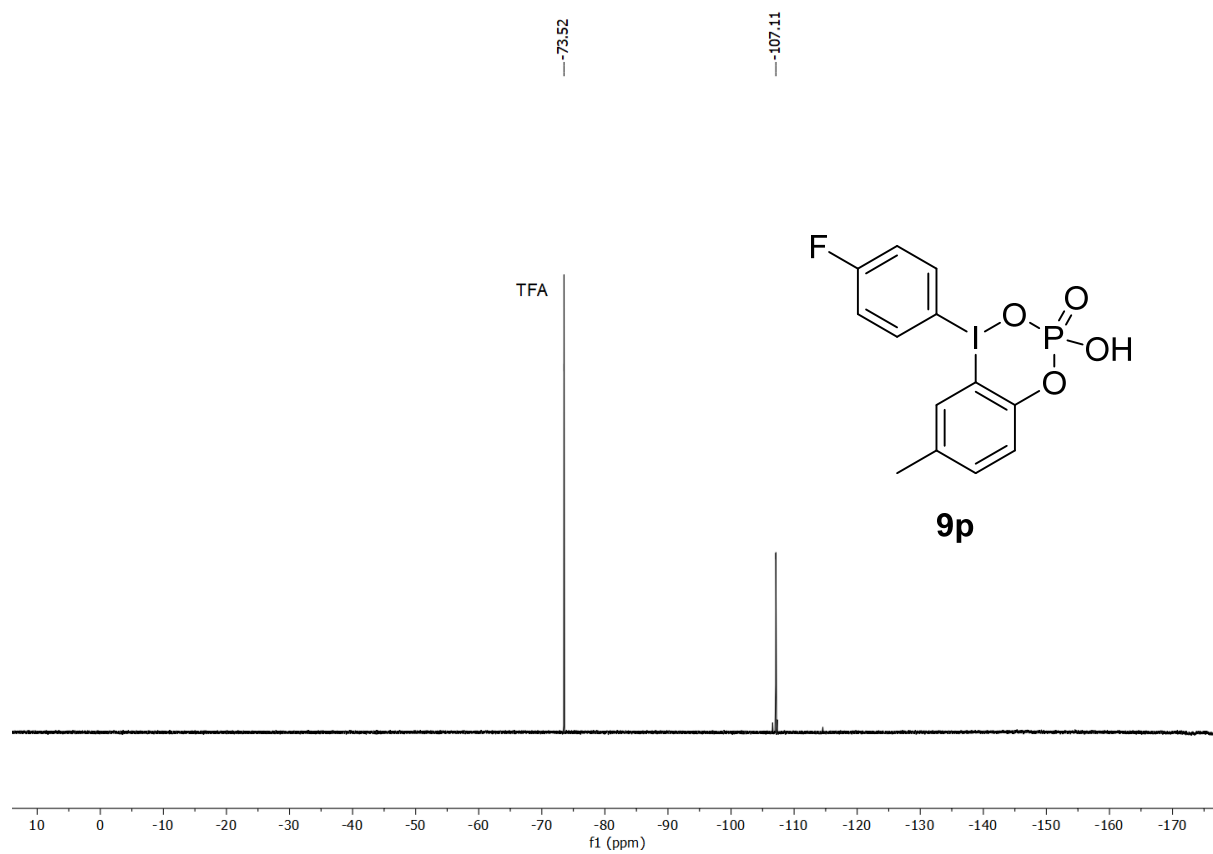

Figure 39: 565 MHz  $^{19}\text{F}$ -NMR-spectrum of **9p** in  $\text{DMSO-}d_6$ .

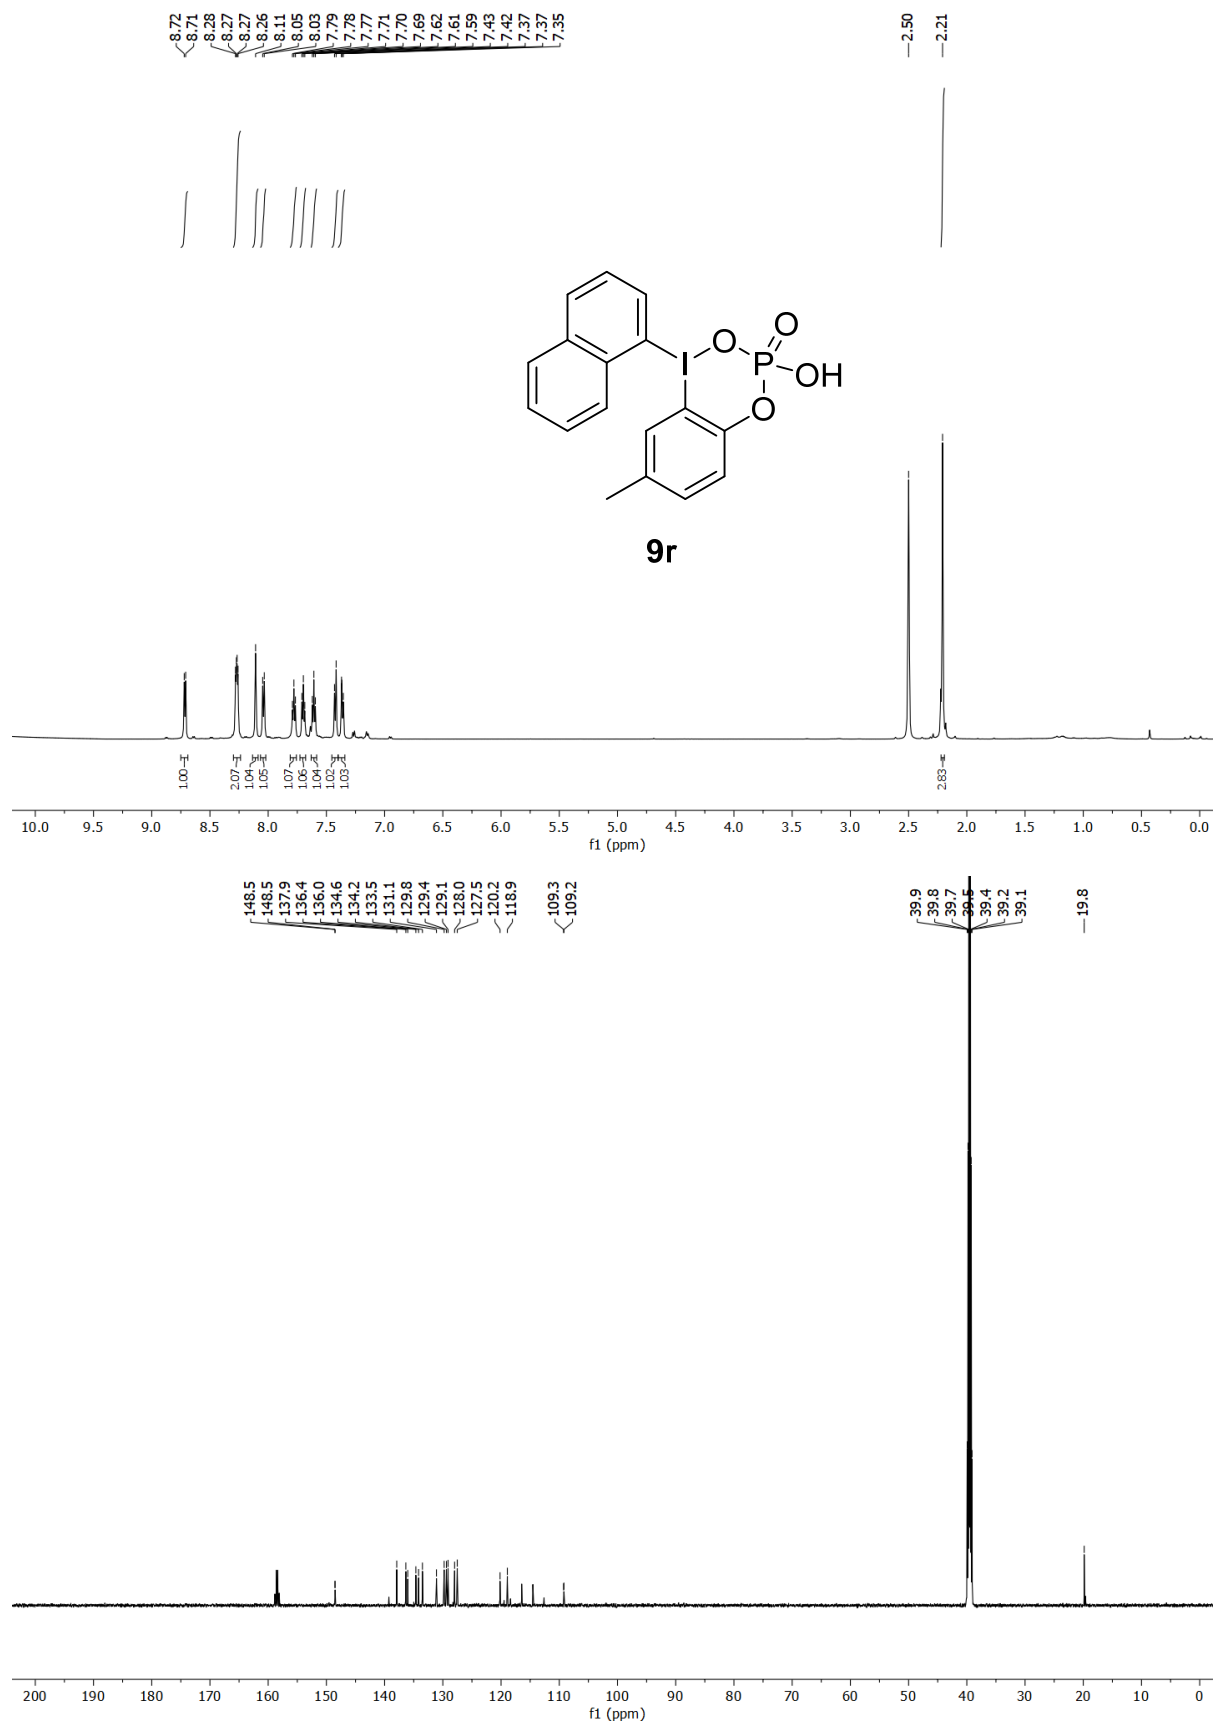

Figure 40: 600 MHz <sup>1</sup>H- and 151 MHz <sup>13</sup>C-NMR-spectrum of **9r** in DMSO-*d*<sub>6</sub>+TFA.

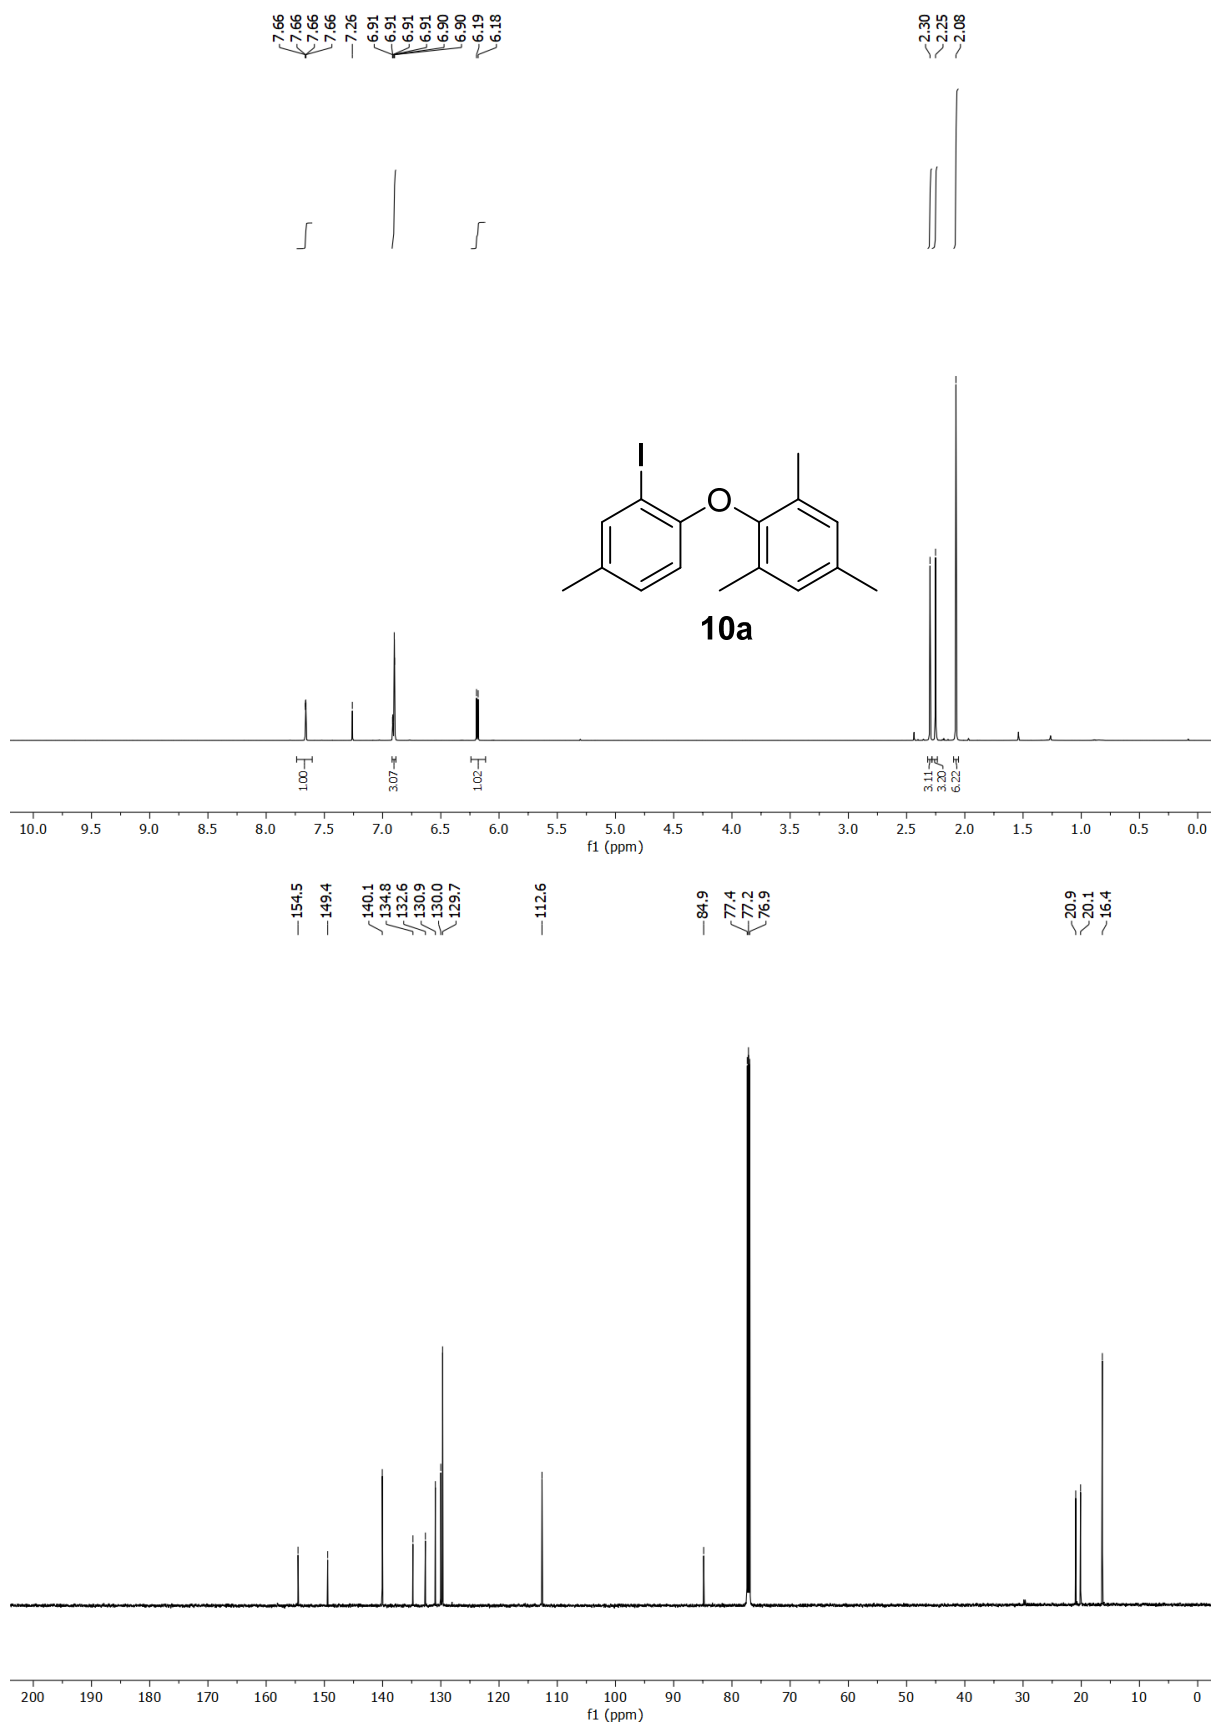

Figure 41: 601 MHz <sup>1</sup>H- and 151 MHz <sup>13</sup>C-NMR-spectrum of **10a** in CDCl<sub>3</sub>.

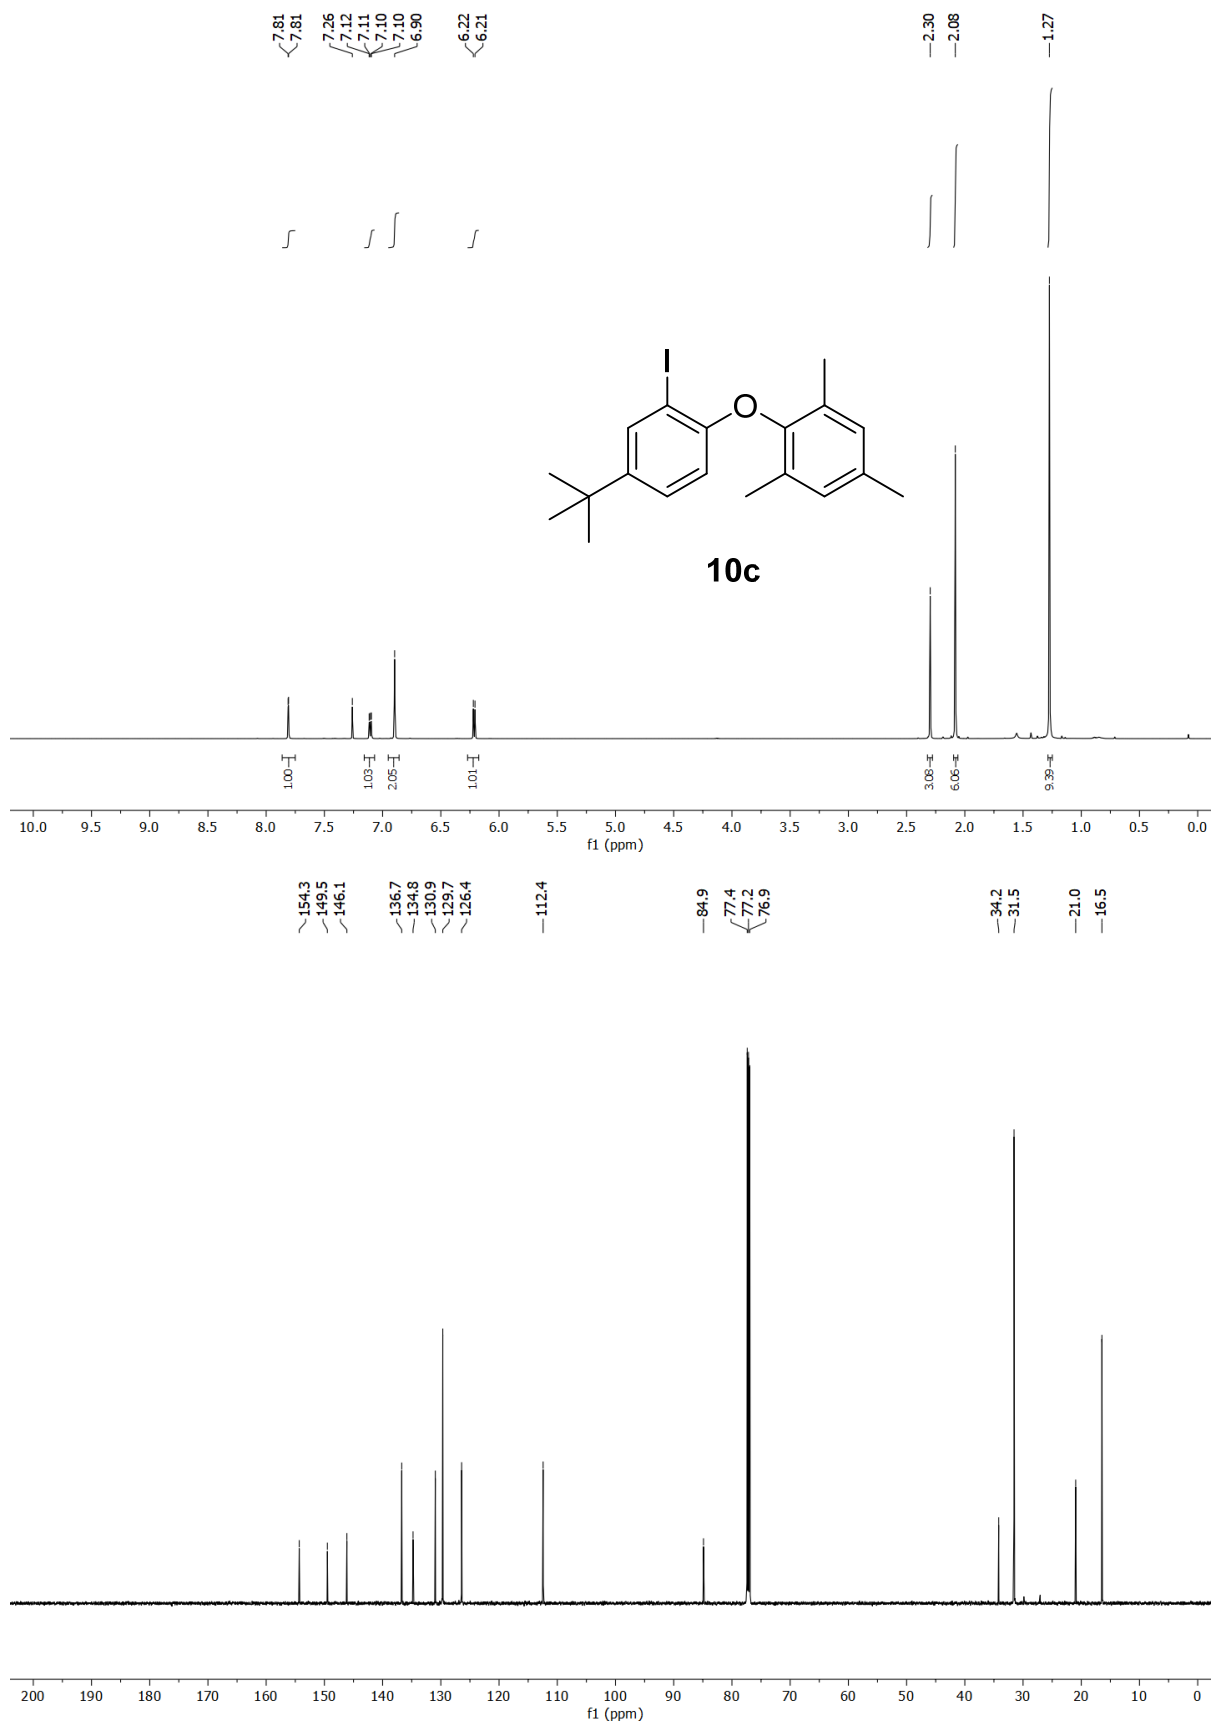

Figure 42: 601 MHz  $^1\text{H}$ - and 151 MHz  $^{13}\text{C}$ -NMR-spectrum of **10c** in  $\text{CDCl}_3$ .



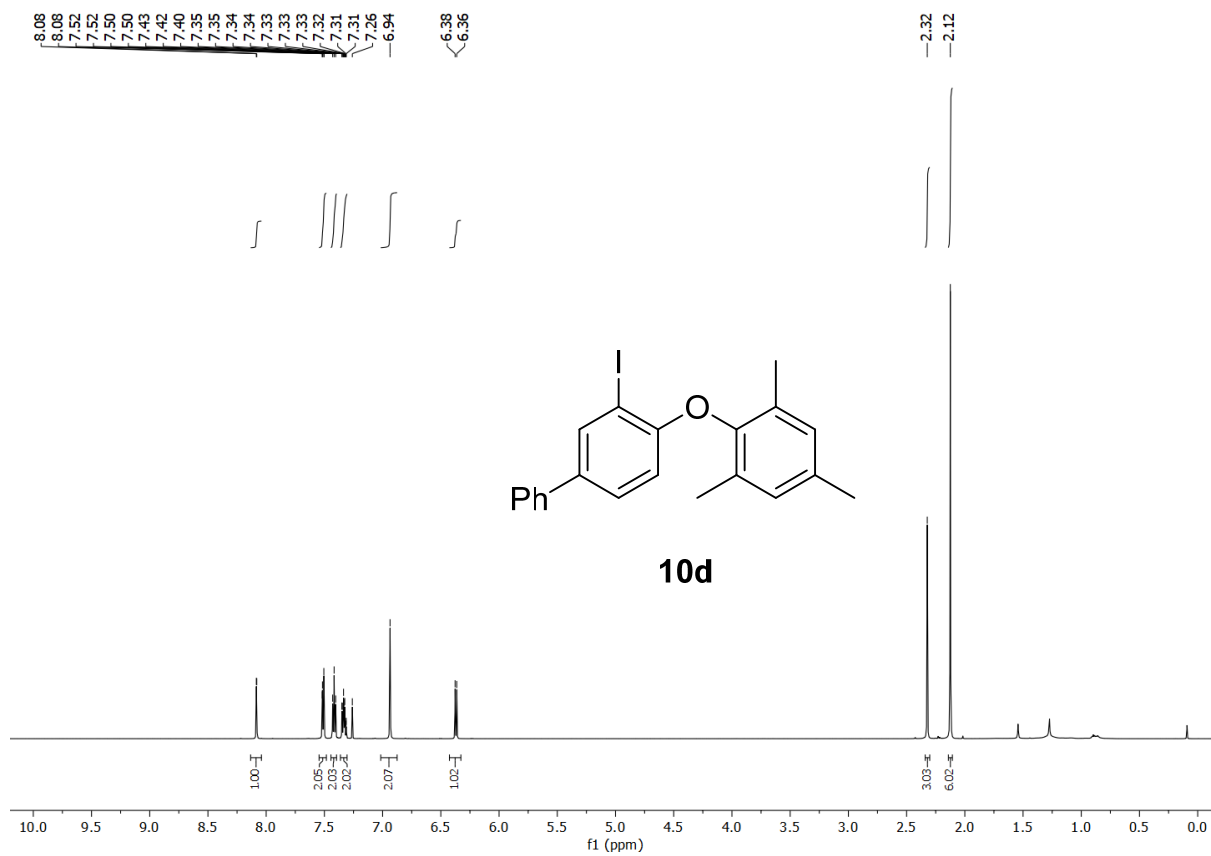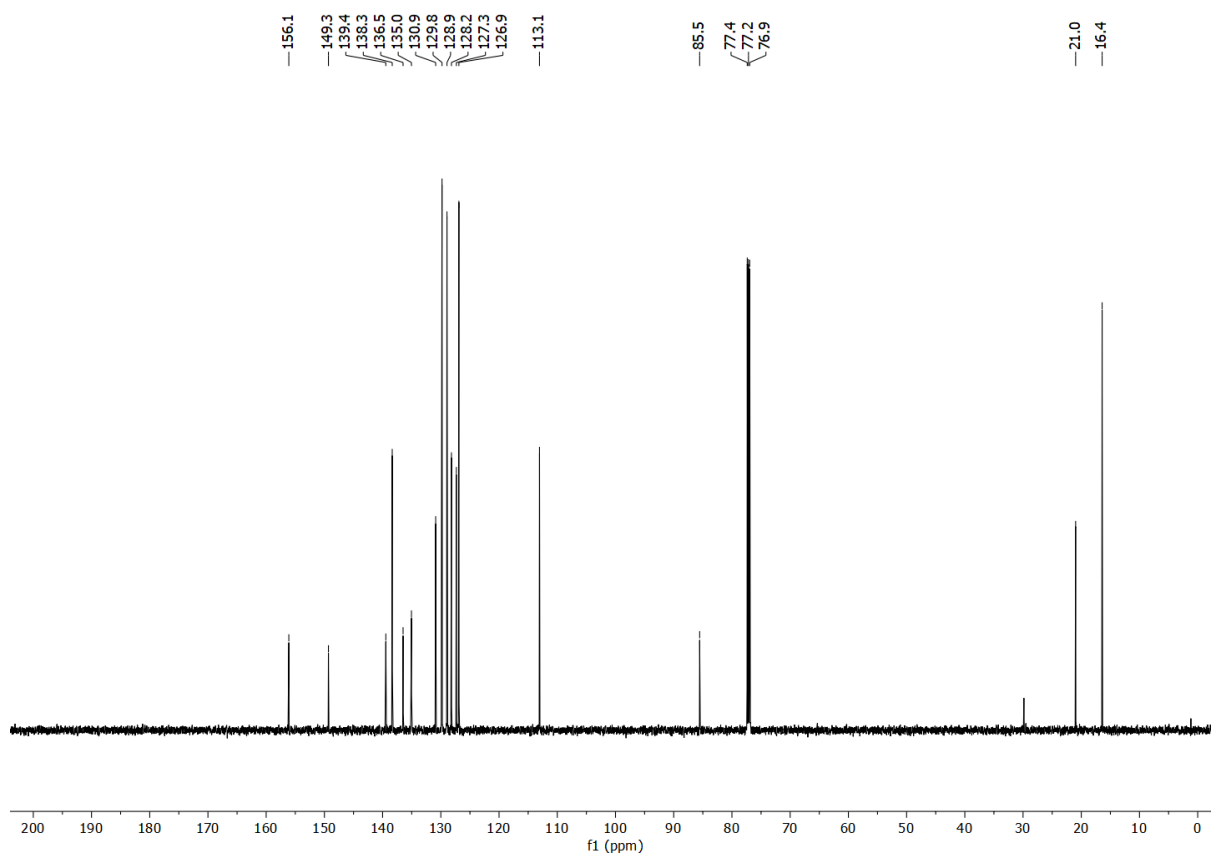

Figure 43: 601 MHz <sup>1</sup>H- and 151 MHz <sup>13</sup>C-NMR-spectrum of **10d** in CDCl<sub>3</sub>.

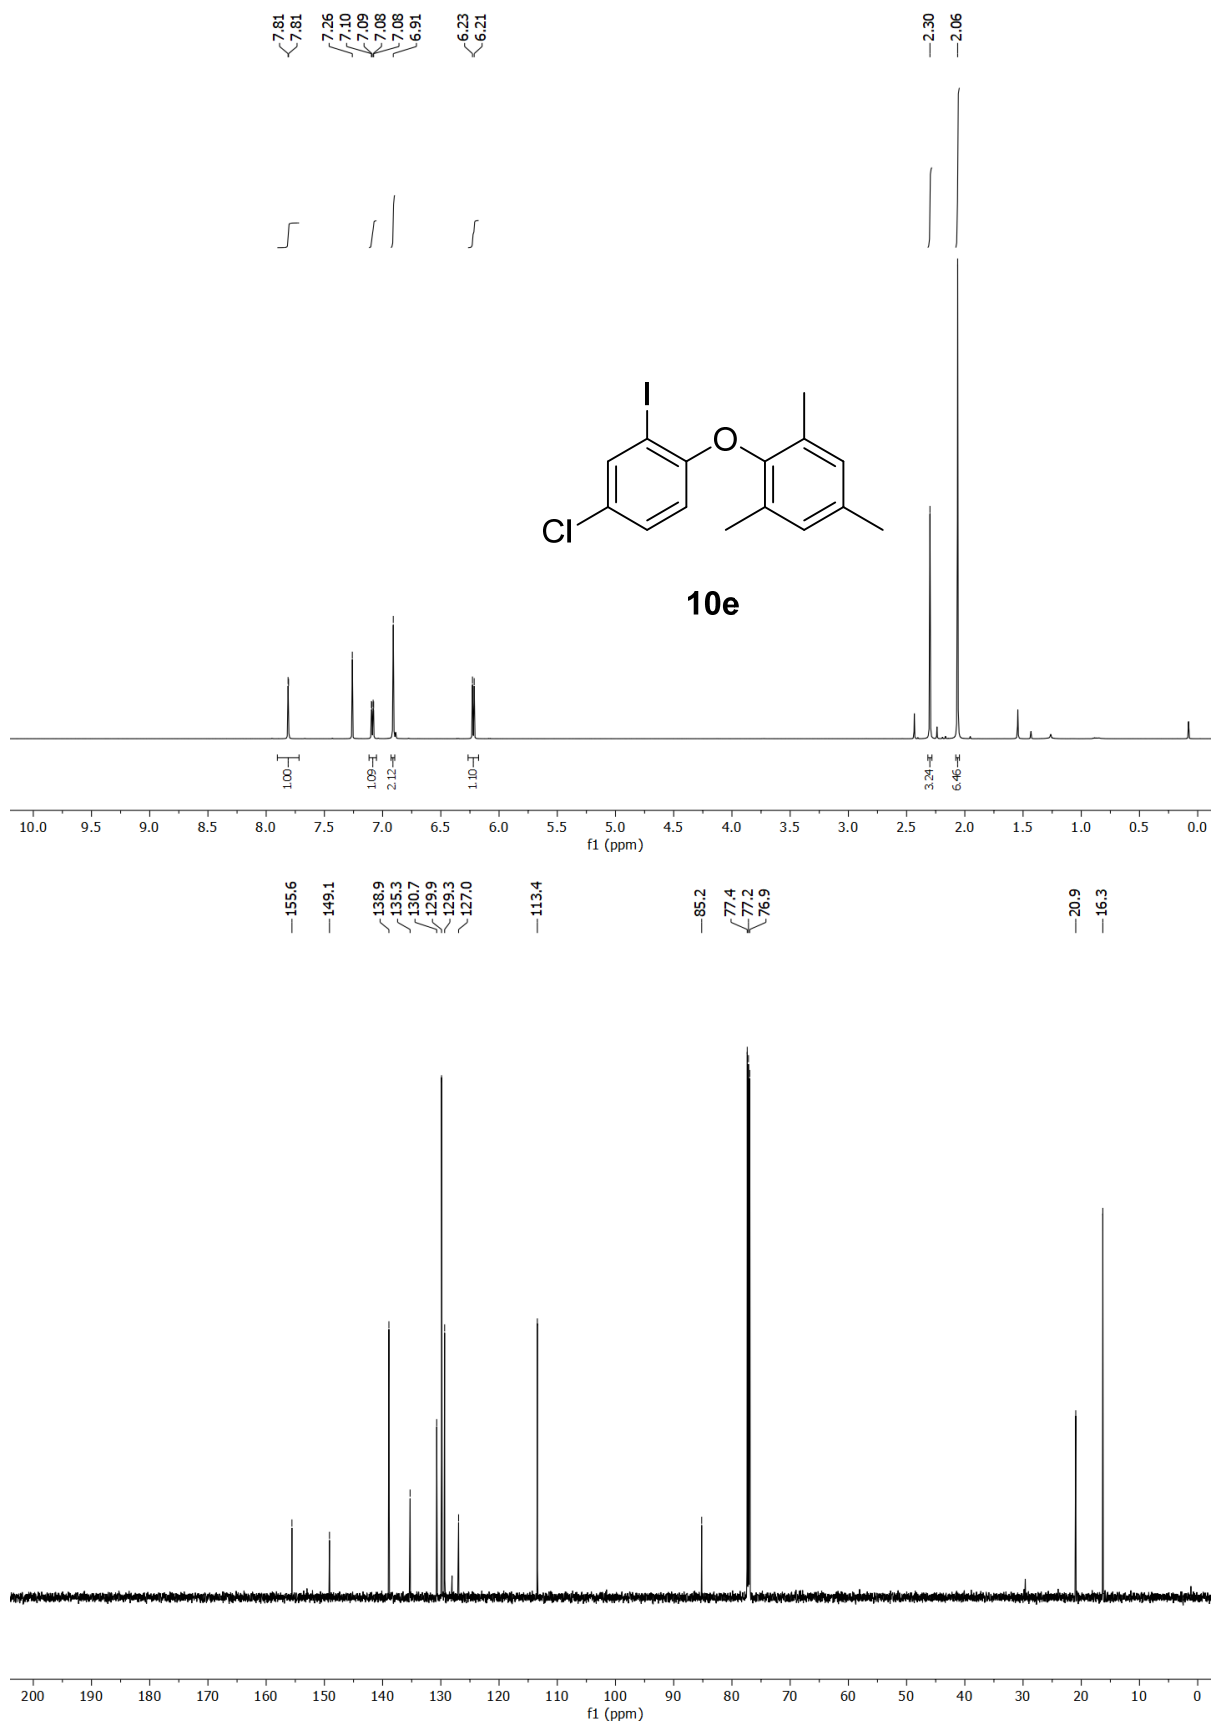

Figure 44: 601 MHz <sup>1</sup>H- and 151 MHz <sup>13</sup>C-NMR-spectrum of **10e** in CDCl<sub>3</sub>.

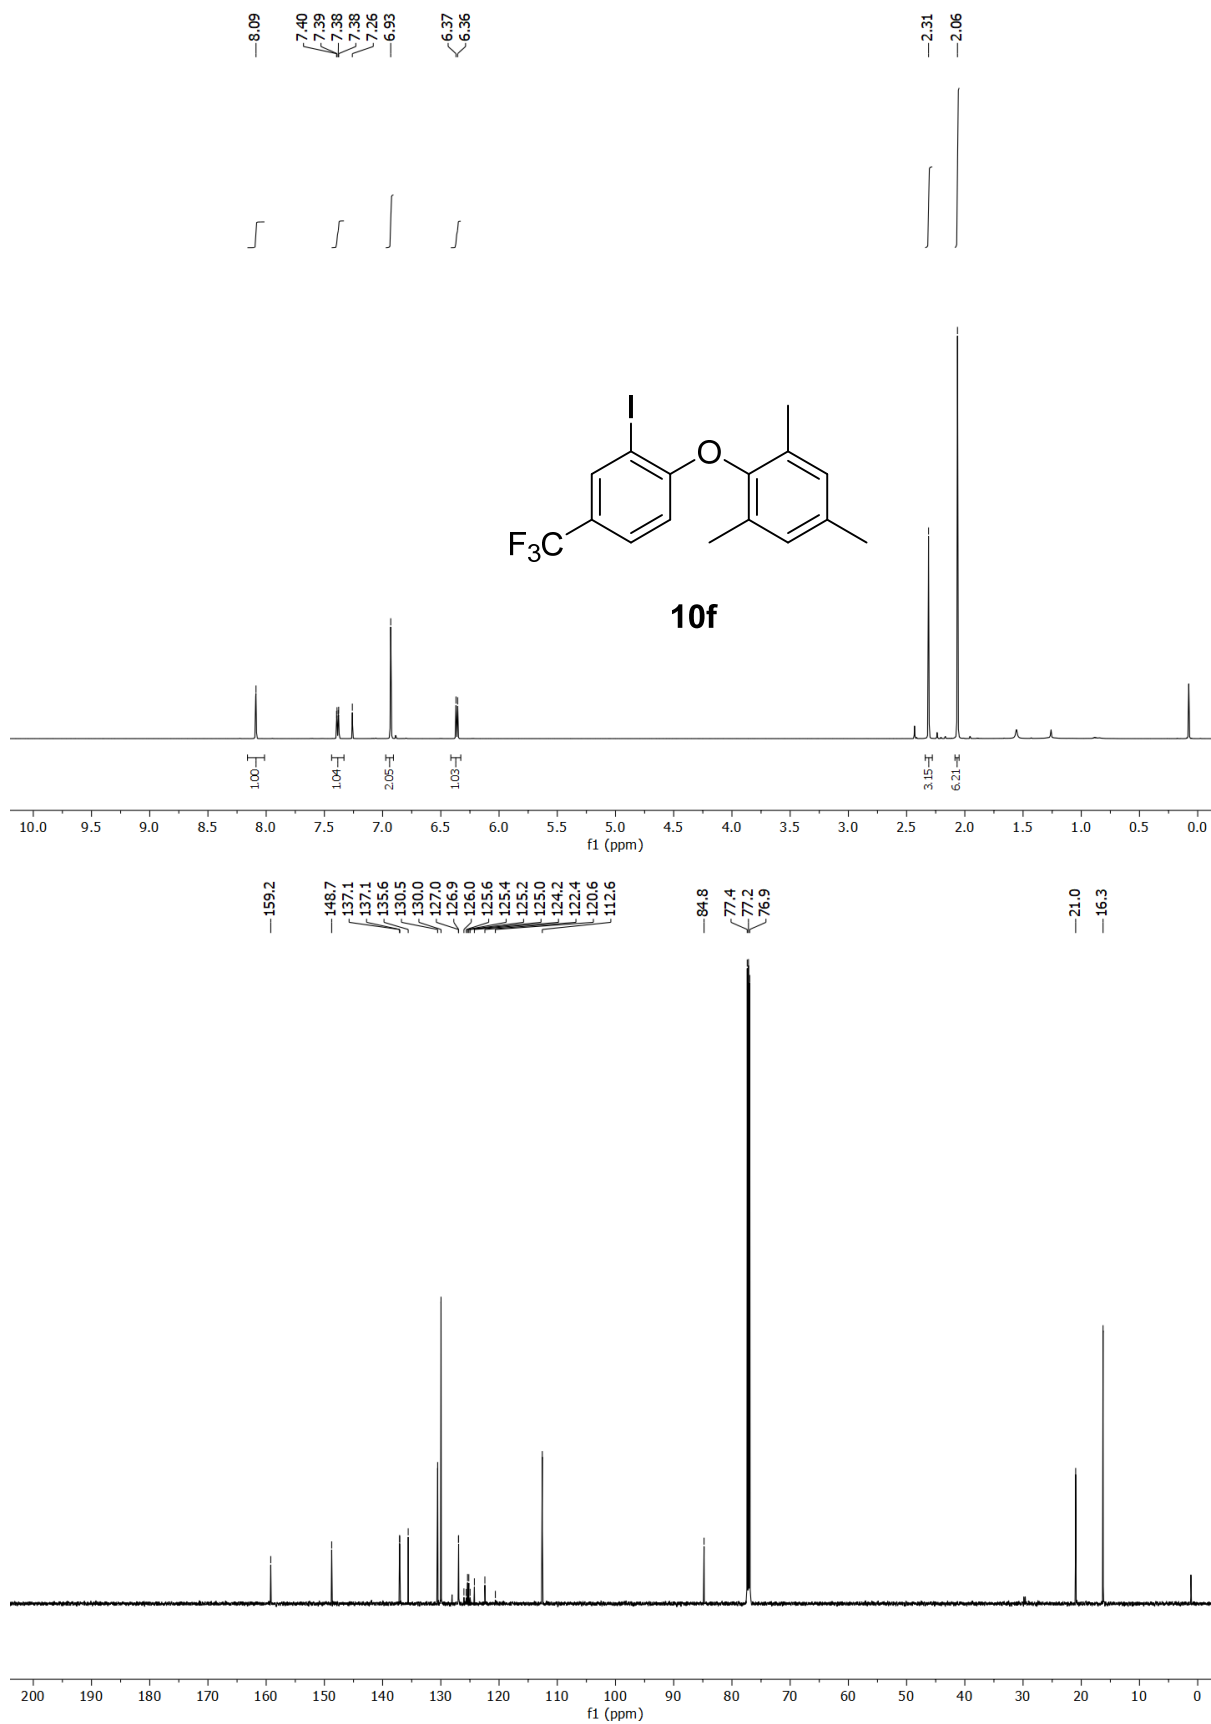

Figure 45: 601 MHz <sup>1</sup>H- and 151 MHz <sup>13</sup>C-NMR-spectrum of **10f** in CDCl<sub>3</sub>.

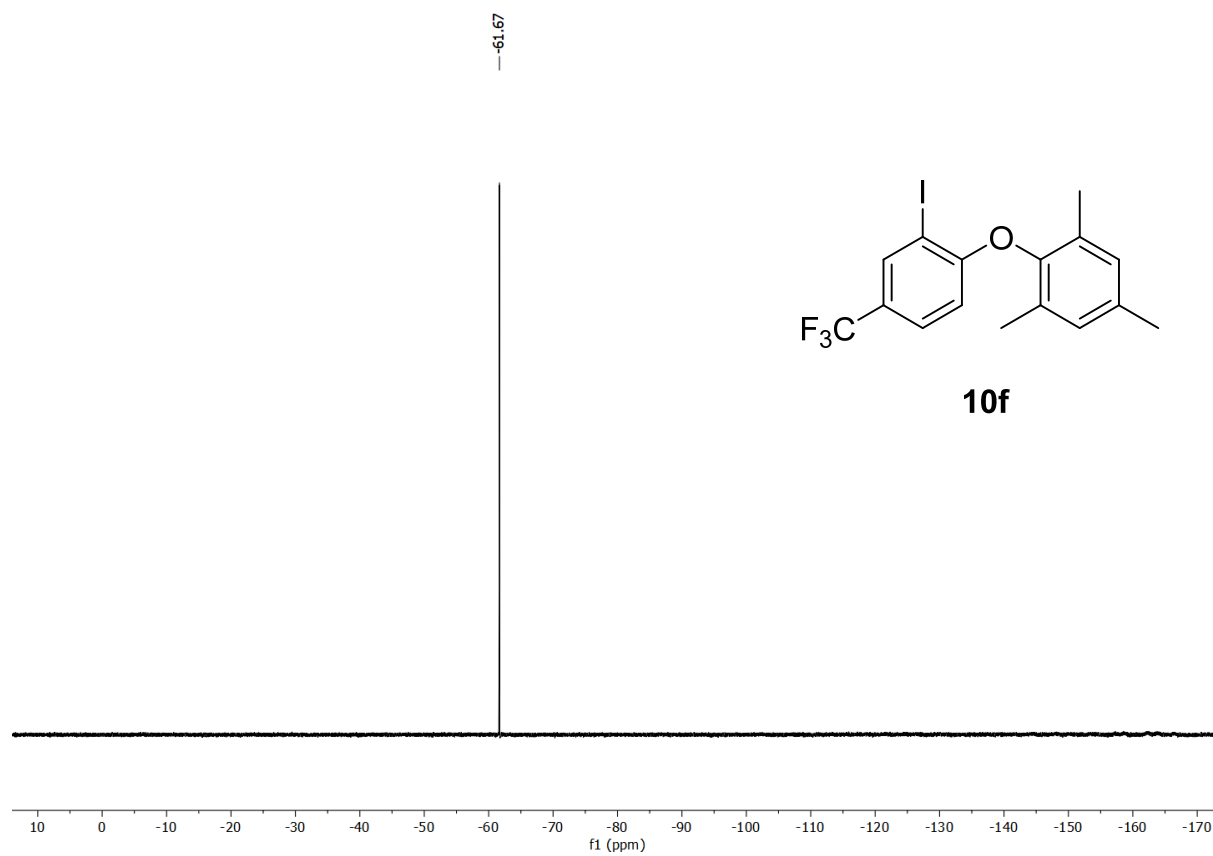

Figure 46: 565 MHz  $^{19}\text{F}$ -NMR-spectrum of **10f** in  $\text{CDCl}_3$ .

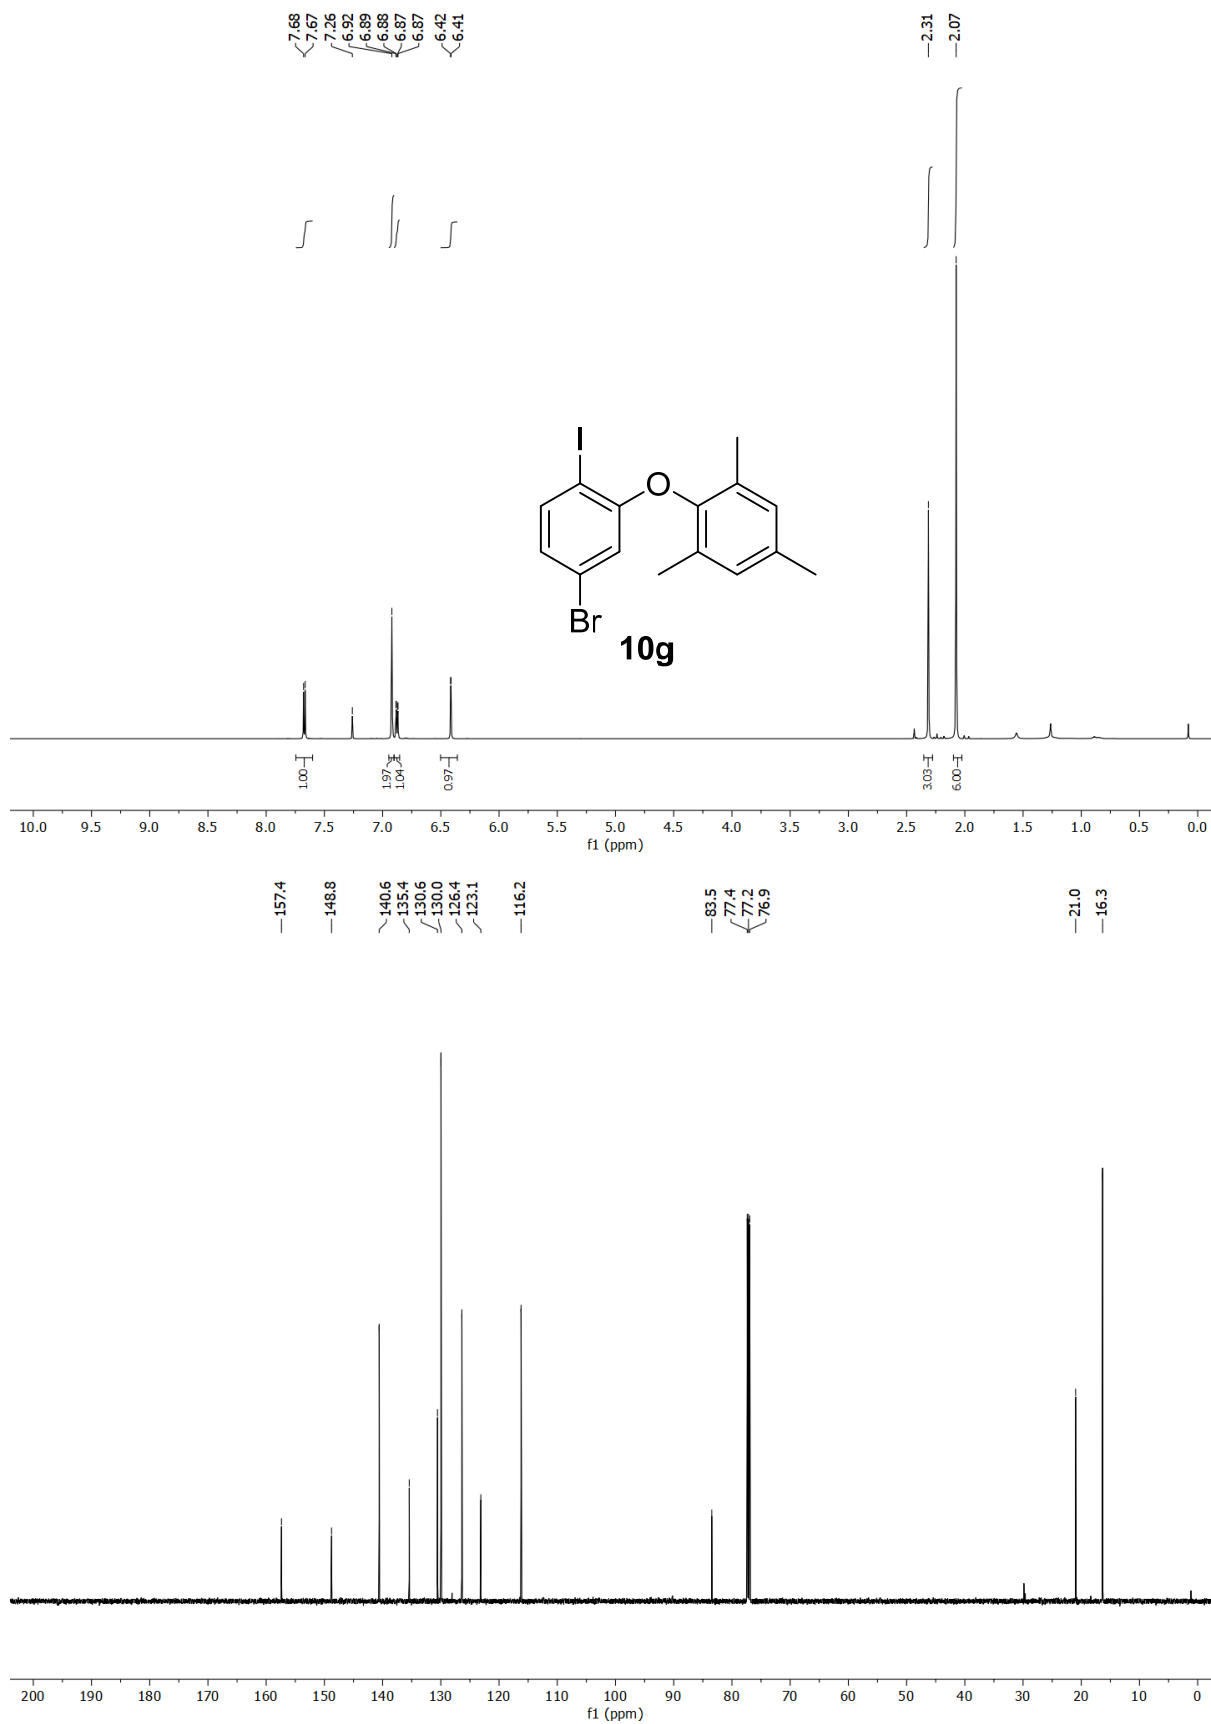

Figure 47: 601 MHz  $^1\text{H}$ - and 151 MHz  $^{13}\text{C}$ -NMR-spectrum of **10g** in  $\text{CDCl}_3$ .

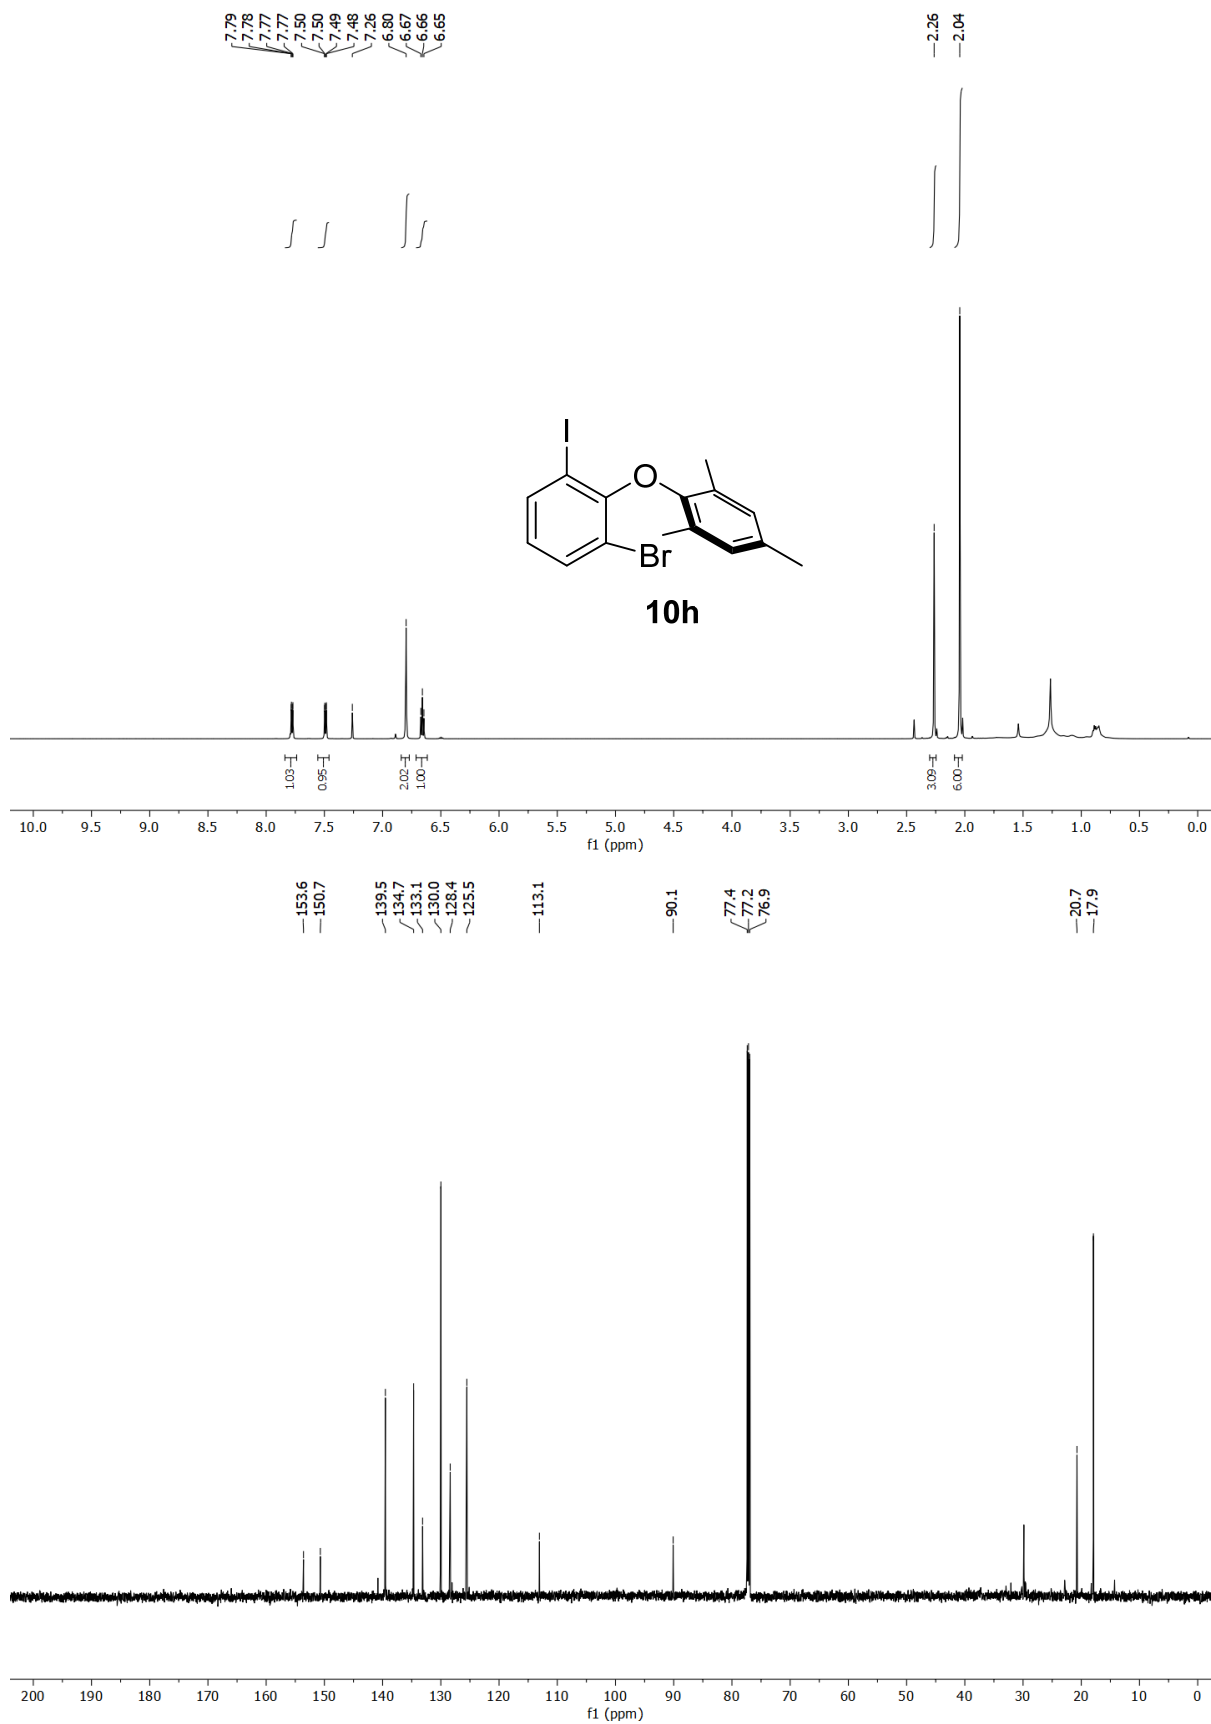

Figure 48: 601 MHz <sup>1</sup>H- and 151 MHz <sup>13</sup>C-NMR-spectrum of **10h** in CDCl<sub>3</sub>.

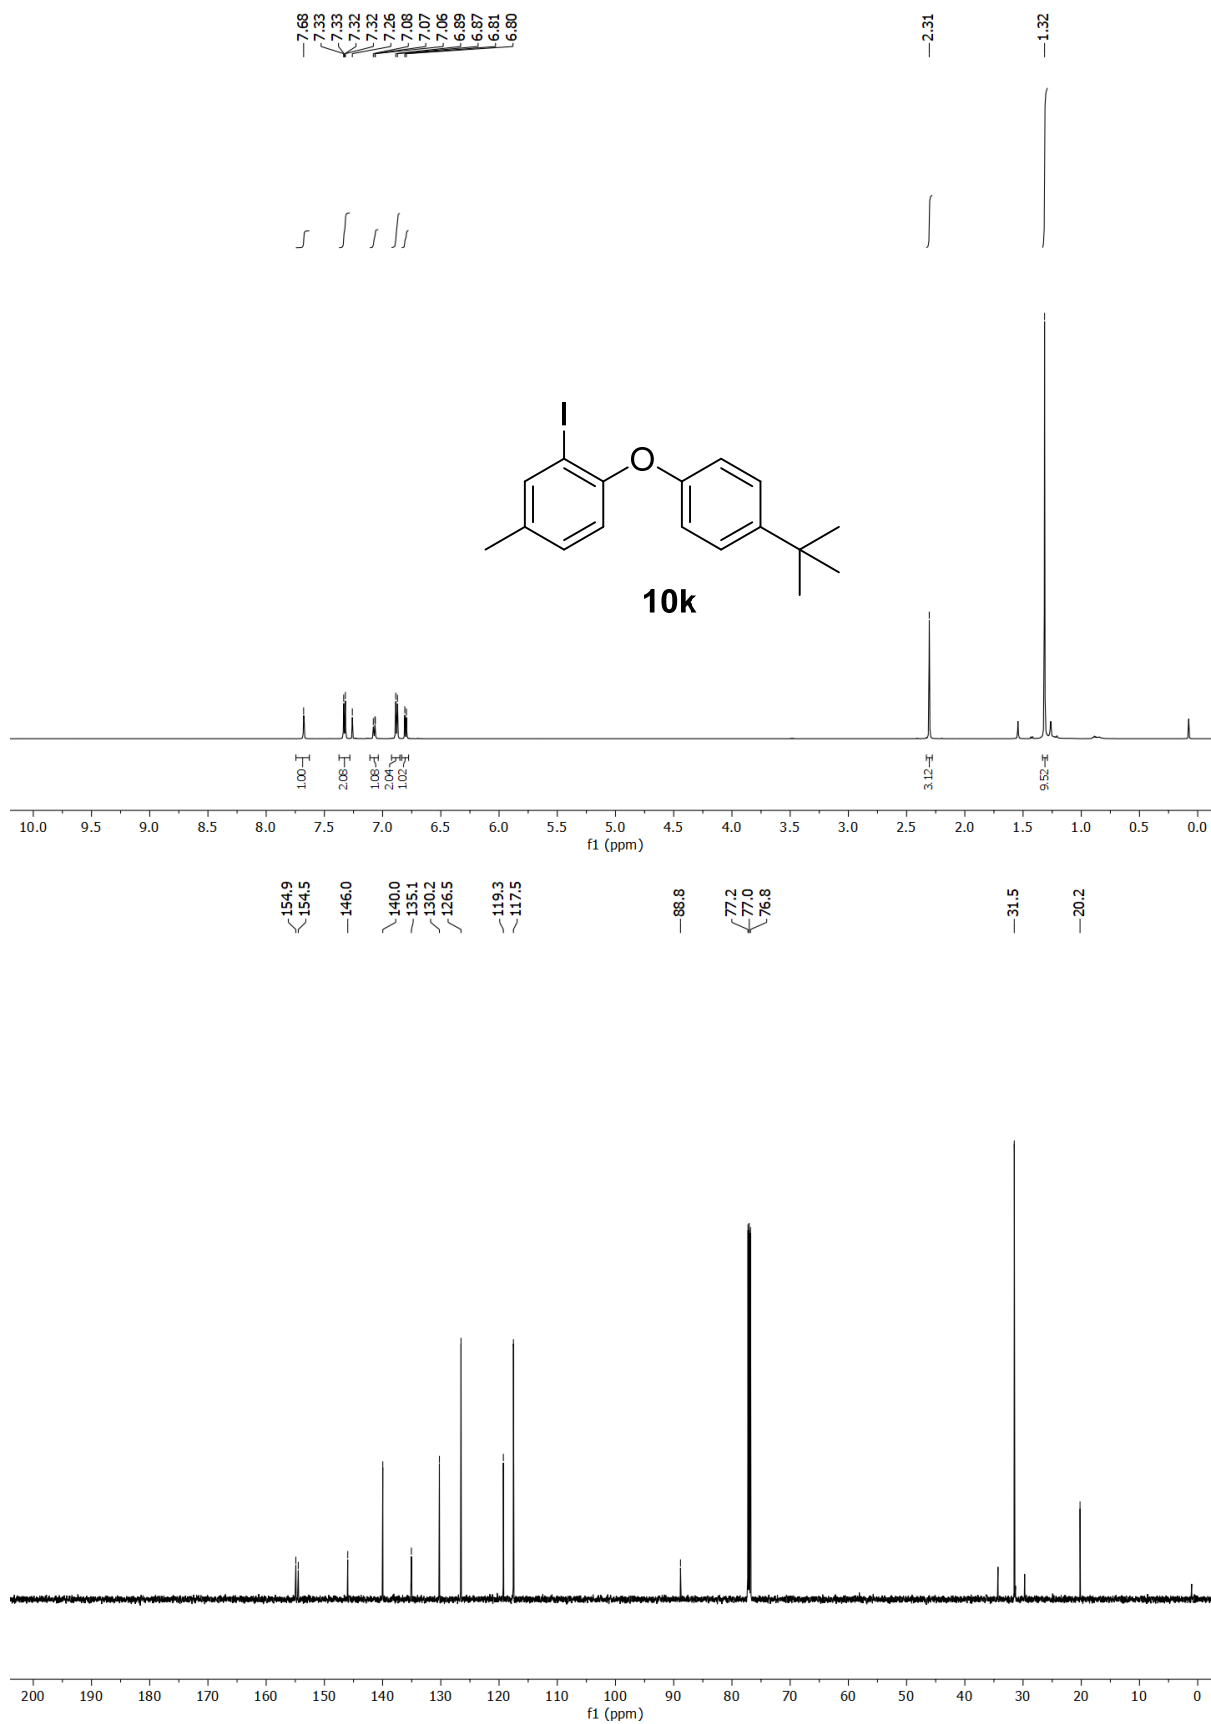

Figure 49: 601 MHz <sup>1</sup>H- and 151 MHz <sup>13</sup>C-NMR-spectrum of **10k** in CDCl<sub>3</sub>.

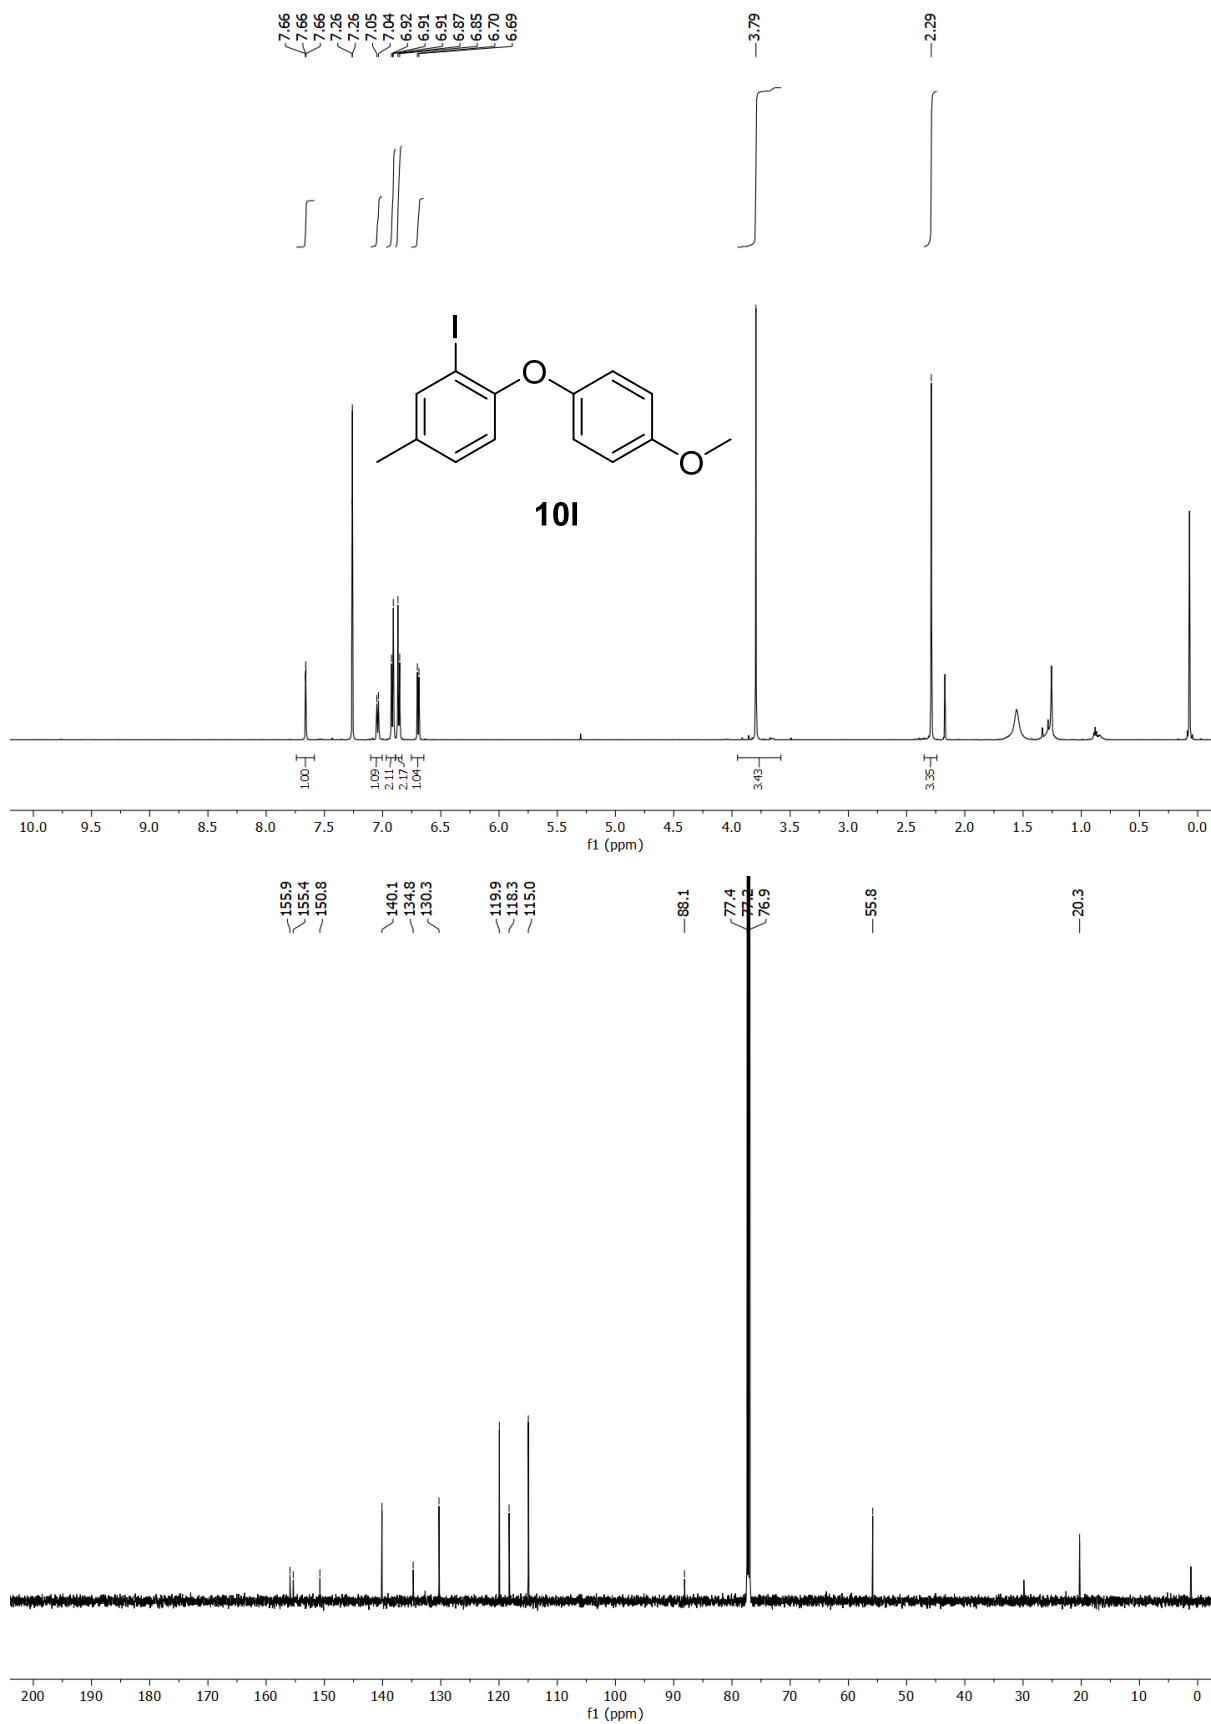

Figure 50: 601 MHz <sup>1</sup>H- and 151 MHz <sup>13</sup>C-NMR-spectrum of **10I** in CDCl<sub>3</sub>.



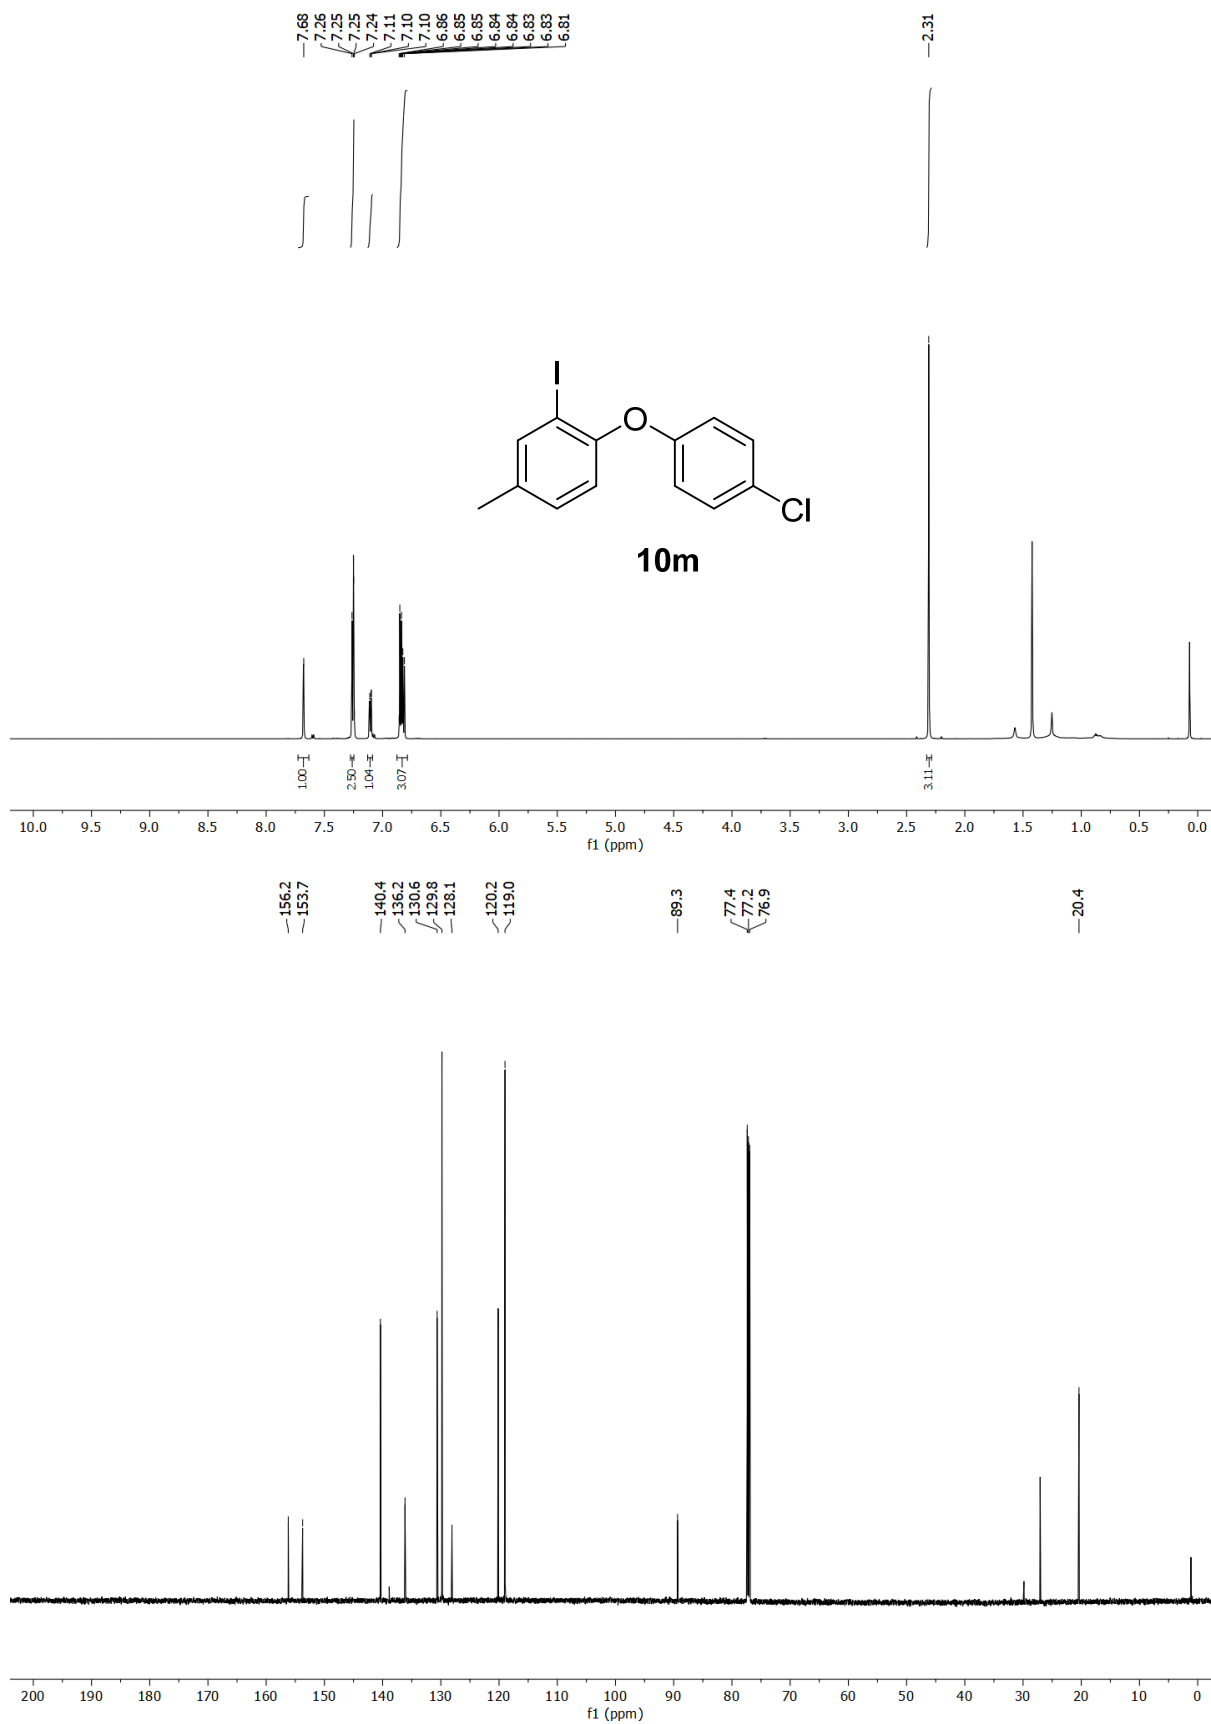

Figure 51: 601 MHz <sup>1</sup>H- and 151 MHz <sup>13</sup>C-NMR-spectrum of **10m** in CDCl<sub>3</sub>.

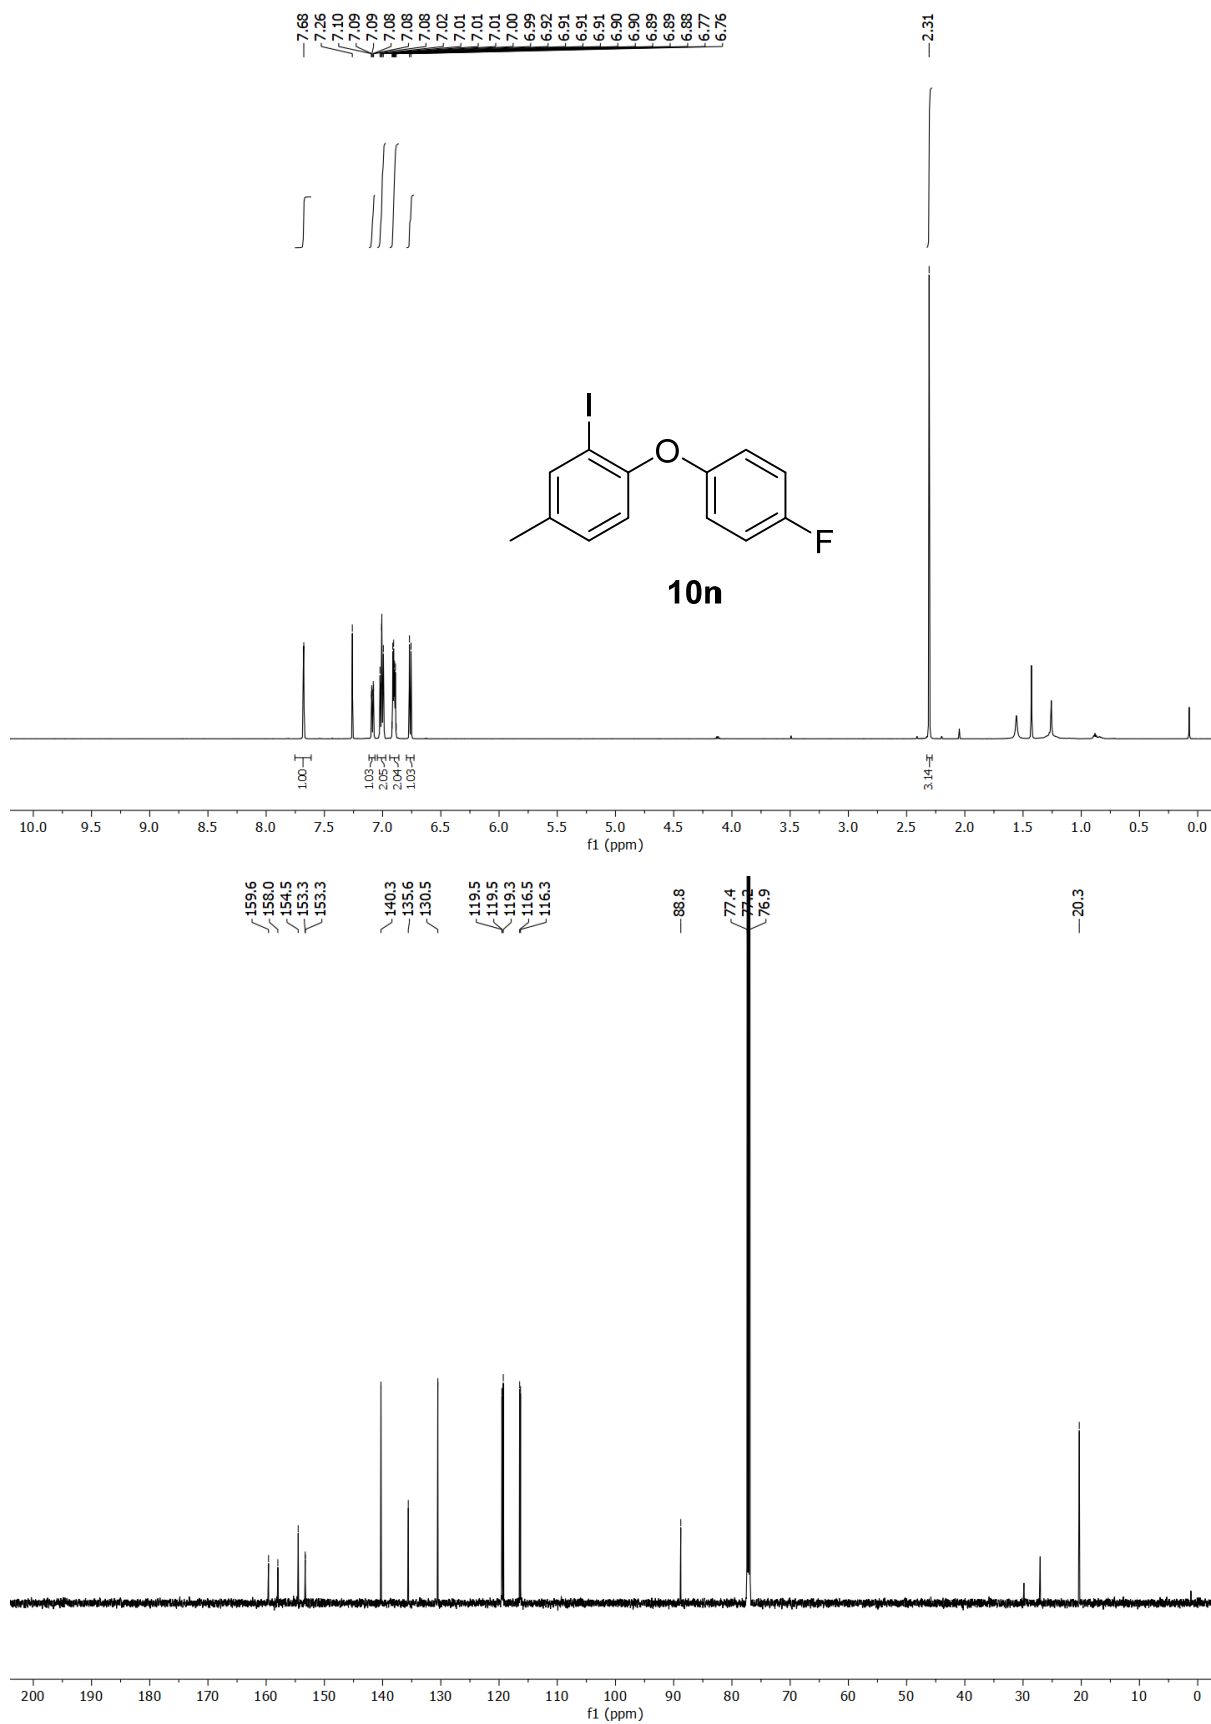

Figure 52: 601 MHz <sup>1</sup>H- and 151 MHz <sup>13</sup>C-NMR-spectrum of **10n** in CDCl<sub>3</sub>.

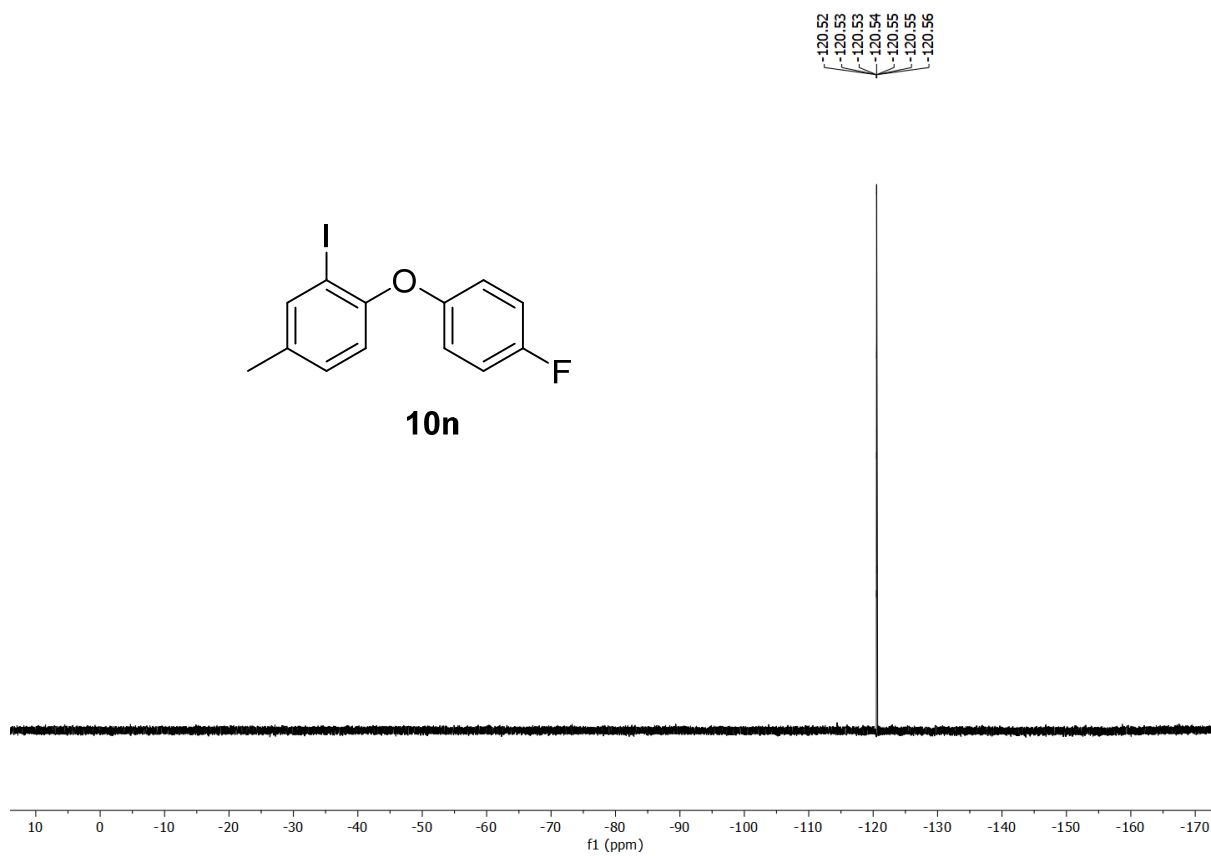

Figure 53: 565 MHz  $^{19}\text{F}$ -NMR-spectrum of **10n** in  $\text{CDCl}_3$ .

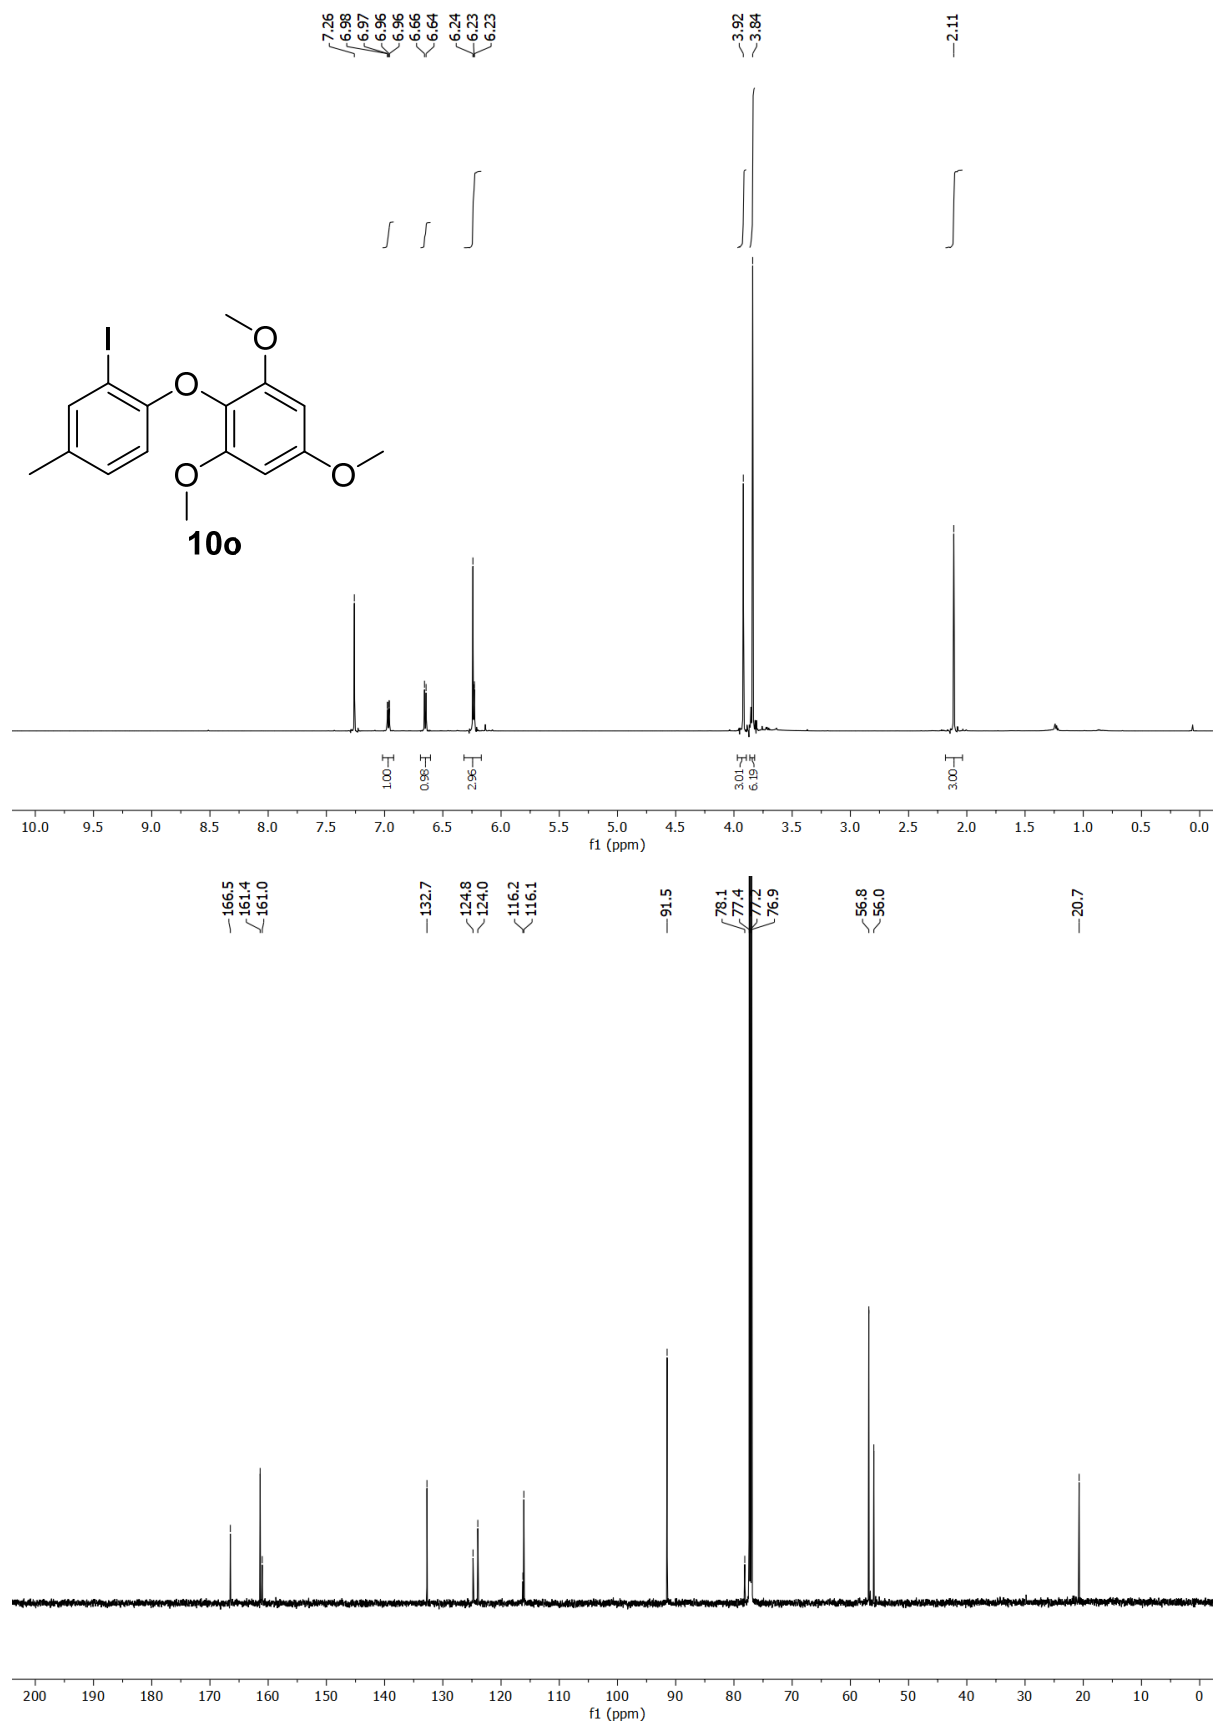

Figure 54: 601 MHz <sup>1</sup>H- and 151 MHz <sup>13</sup>C-NMR-spectrum of **10o** in CDCl<sub>3</sub>.

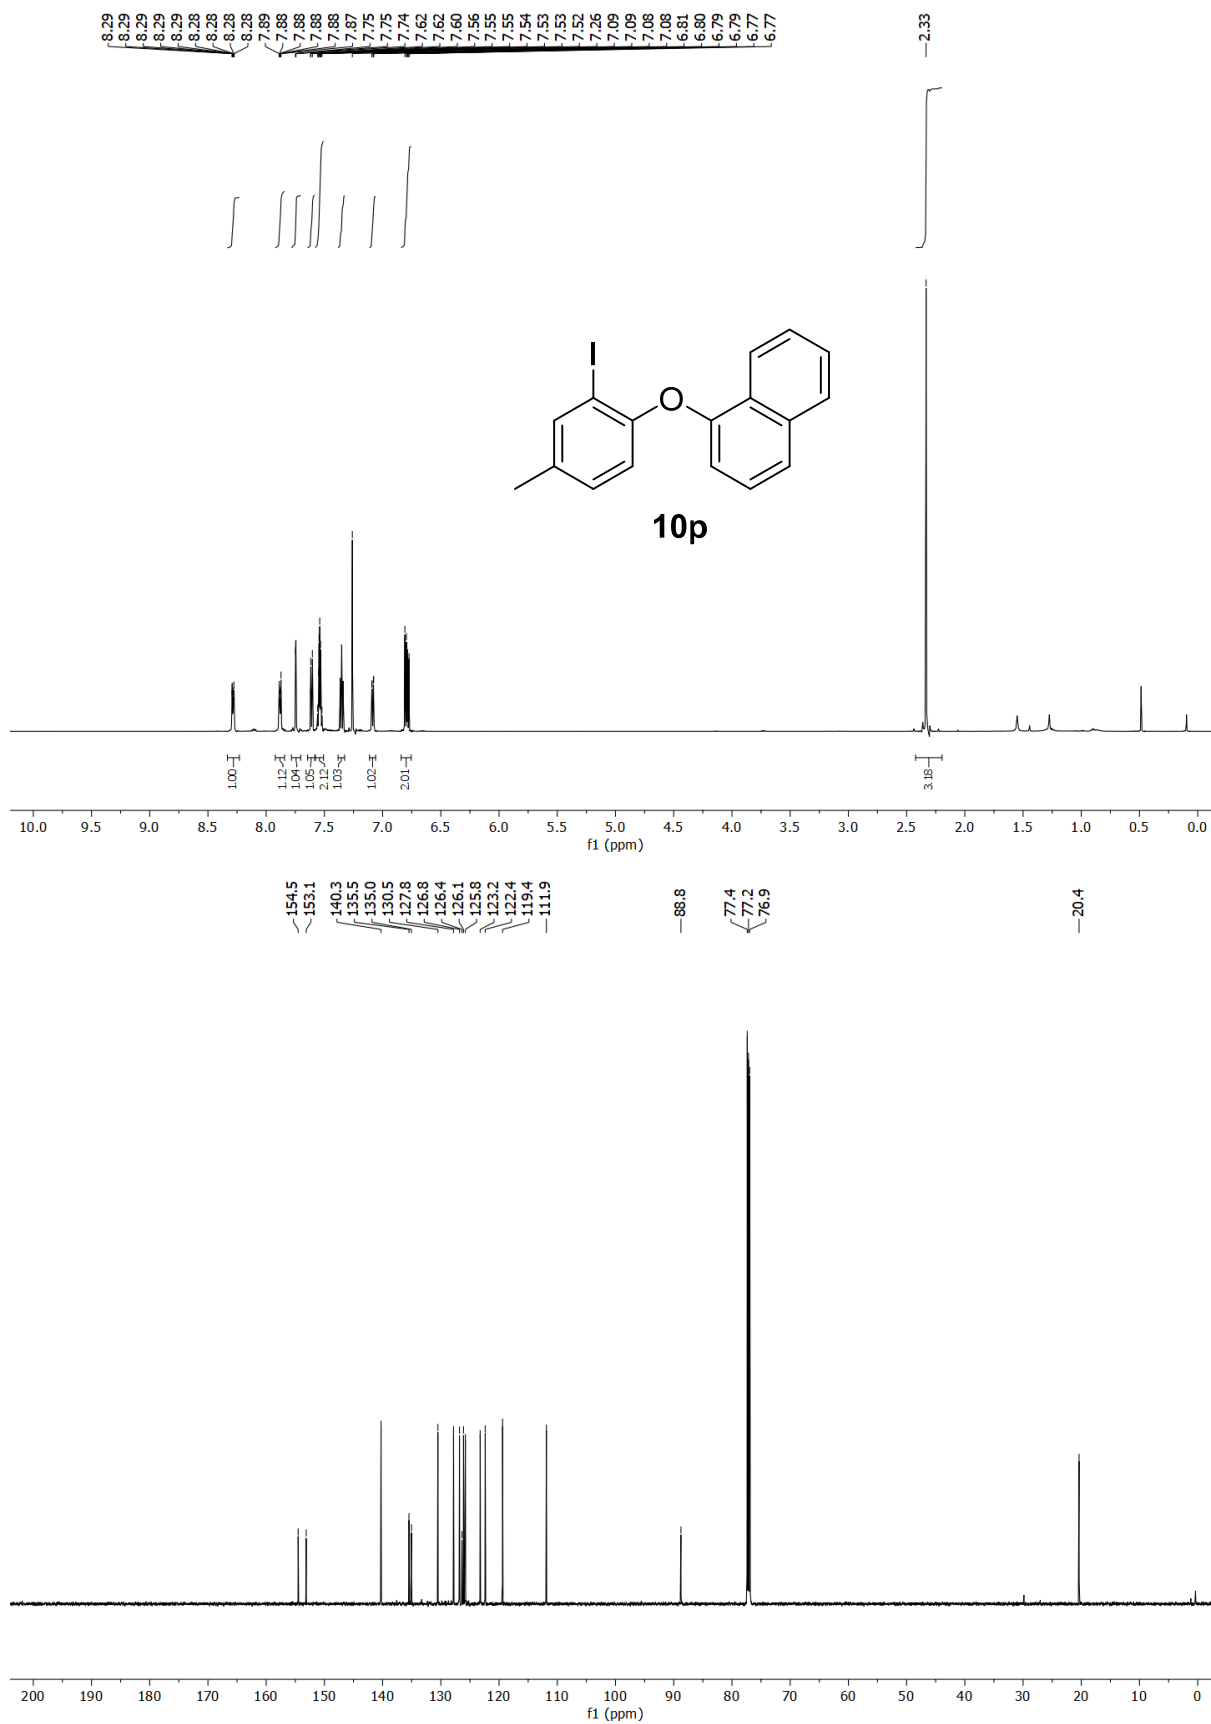

Figure 55: 601 MHz <sup>1</sup>H- and 151 MHz <sup>13</sup>C-NMR-spectrum of **10p** in CDCl<sub>3</sub>.

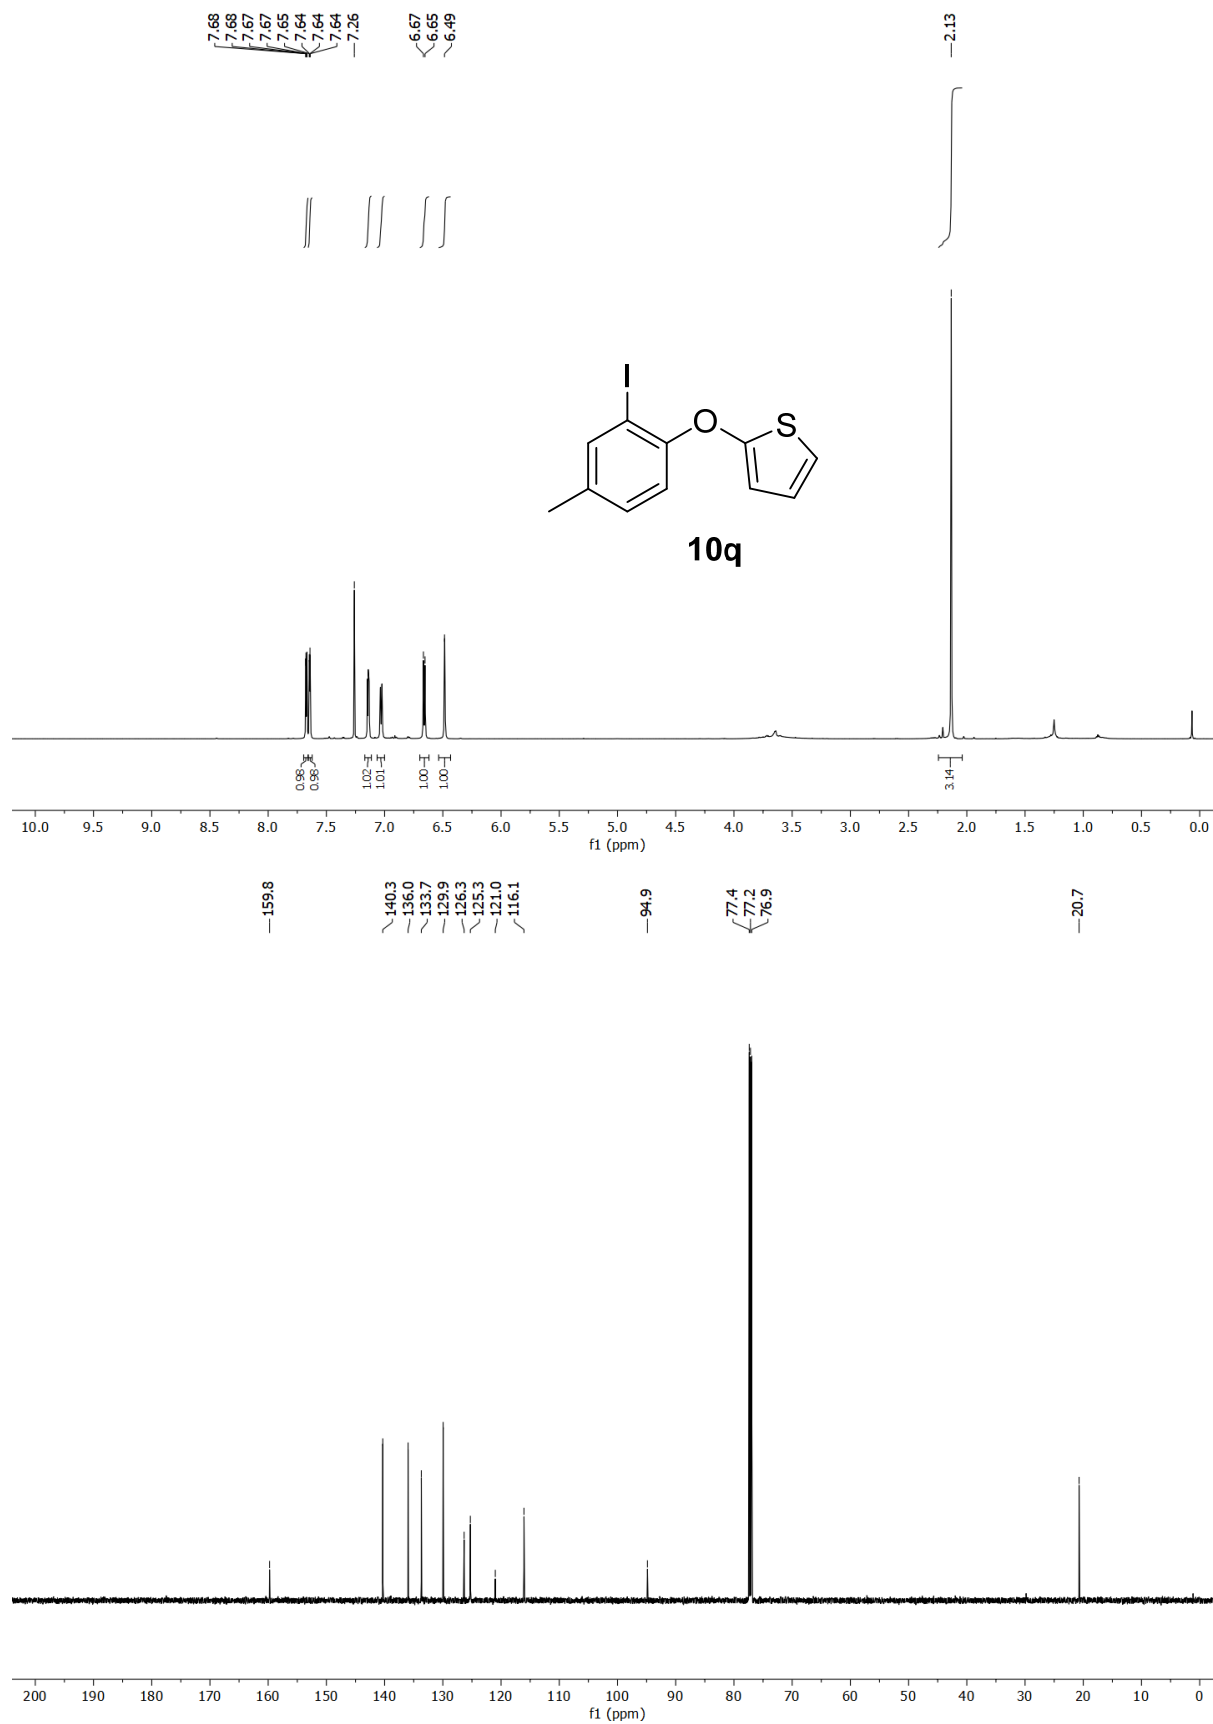

Figure 56: 601 MHz <sup>1</sup>H- and 151 MHz <sup>13</sup>C-NMR-spectrum of **10q** in CDCl<sub>3</sub>.

## 7. Crystallographic Data

Crystallographic Data for the obtained single crystal structures for **7a** and **9a**.

### 7.1 Crystallographic Data from Compound **8a**

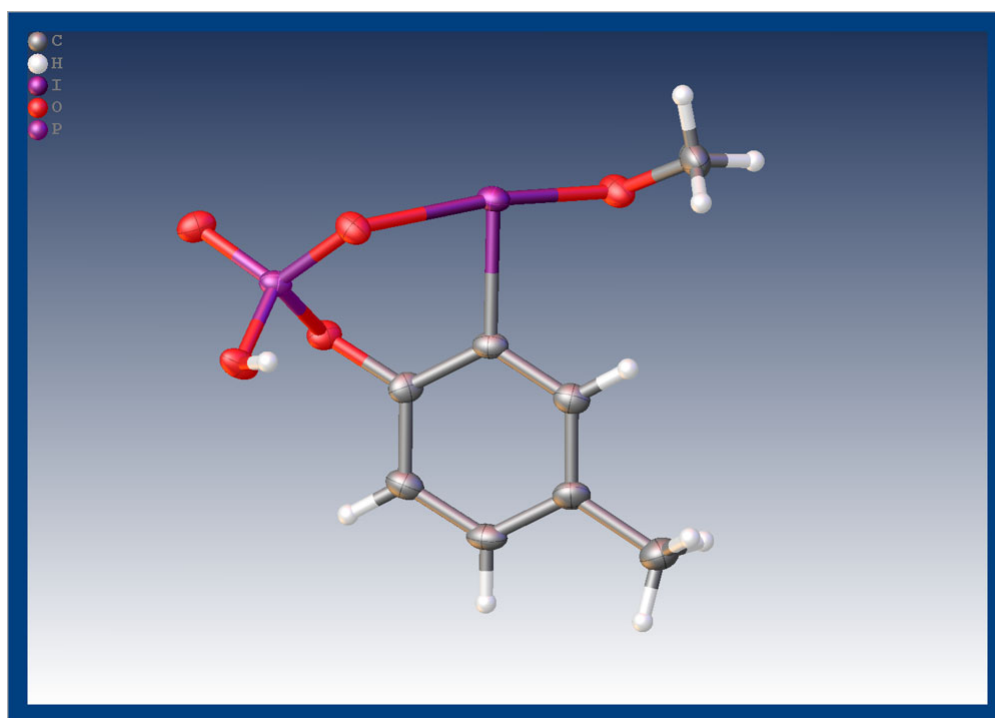

Figure 57: . Crystal data and structure refinement for **8a**.

Table 2: Crystal data and structure refinement for **8a**.

|                                    |                                                  |
|------------------------------------|--------------------------------------------------|
| Empirical formula                  | C <sub>8</sub> H <sub>10</sub> IO <sub>5</sub> P |
| Formula weight                     | 344.03                                           |
| Temperature/K                      | 100.00                                           |
| Crystal system                     | monoclinic                                       |
| Space group                        | C2/c                                             |
| a/Å                                | 22.585(3)                                        |
| b/Å                                | 4.4660(6)                                        |
| c/Å                                | 22.660(3)                                        |
| α/°                                | 90                                               |
| β/°                                | 99.875(4)                                        |
| γ/°                                | 90                                               |
| Volume/Å <sup>3</sup>              | 2251.8(5)                                        |
| Z                                  | 8                                                |
| ρ <sub>calc</sub> /cm <sup>3</sup> | 2.030                                            |
| μ/mm <sup>-1</sup>                 | 2.985                                            |
| F(000)                             | 1328.0                                           |
| Crystal size/mm <sup>3</sup>       | 0.12 × 0.113 × 0.064                             |
| Radiation                          | MoKα (λ = 0.71073)                               |
| 2θ range for data collection/°     | 4.706 to 52.042                                  |

|                                             |                                                               |
|---------------------------------------------|---------------------------------------------------------------|
| Index ranges                                | -27 ≤ h ≤ 27, -5 ≤ k ≤ 5, -27 ≤ l ≤ 27                        |
| Reflections collected                       | 26909                                                         |
| Independent reflections                     | 2218 [R <sub>int</sub> = 0.0927, R <sub>sigma</sub> = 0.0361] |
| Data/restraints/parameters                  | 2218/0/139                                                    |
| Goodness-of-fit on F <sup>2</sup>           | 1.041                                                         |
| Final R indexes [I >= 2σ (I)]               | R <sub>1</sub> = 0.0271, wR <sub>2</sub> = 0.0622             |
| Final R indexes [all data]                  | R <sub>1</sub> = 0.0348, wR <sub>2</sub> = 0.0653             |
| Largest diff. peak/hole / e Å <sup>-3</sup> | 1.01/-0.45                                                    |

Table 3: Fractional Atomic Coordinates ( $\times 10^4$ ) and Equivalent Isotropic Displacement Parameters ( $\text{\AA}^2 \times 10^3$ ) for **8a**.

| Atom | x          | y         | z          | U(eq)     |
|------|------------|-----------|------------|-----------|
| I1   | 6670.0(2)  | 5333.2(5) | 5187.8(2)  | 18.06(10) |
| P1   | 7938.8(4)  | 5740(2)   | 6164.2(4)  | 17.1(2)   |
| O2   | 7643.1(12) | 4337(6)   | 5578.6(12) | 21.3(6)   |
| O3   | 8342.5(13) | 8323(6)   | 6115.0(12) | 22.7(6)   |
| O5   | 5793.4(12) | 6098(7)   | 4949.1(12) | 25.2(6)   |
| O4   | 8252.0(13) | 3314(6)   | 6591.9(12) | 22.2(6)   |
| O1   | 7405.4(12) | 7073(6)   | 6480.0(11) | 19.8(6)   |
| C1   | 6534.9(17) | 4140(8)   | 6048.1(17) | 18.9(8)   |
| C6   | 6926.4(18) | 5217(8)   | 6543.2(18) | 19.6(8)   |
| C5   | 6823.7(19) | 4509(9)   | 7114.9(18) | 22.7(8)   |
| C7   | 5501.7(19) | 4120(10)  | 4480.9(19) | 29.0(9)   |
| C2   | 6056.1(18) | 2310(9)   | 6116.5(18) | 22.8(9)   |
| C3   | 5948.2(19) | 1597(9)   | 6684.9(18) | 23.6(9)   |
| C4   | 6338.0(18) | 2749(9)   | 7180.7(18) | 24.0(9)   |
| C8   | 5424(2)    | -336(10)  | 6768(2)    | 31.1(10)  |

Table 4: Anisotropic Displacement Parameters ( $\text{\AA}^2 \times 10^3$ ) for **8a**.

| Atom | U <sub>11</sub> | U <sub>22</sub> | U <sub>33</sub> | U <sub>23</sub> | U <sub>13</sub> | U <sub>12</sub> |
|------|-----------------|-----------------|-----------------|-----------------|-----------------|-----------------|
| I1   | 22.33(15)       | 18.86(14)       | 13.55(14)       | 0.96(10)        | 4.65(9)         | 3.59(10)        |
| P1   | 23.3(5)         | 14.3(4)         | 14.1(5)         | 0.0(4)          | 4.1(4)          | 1.6(4)          |
| O2   | 22.2(14)        | 22.6(14)        | 19.6(14)        | -3.7(11)        | 4.3(11)         | 6.1(11)         |
| O3   | 30.6(16)        | 14.6(13)        | 25.2(15)        | -1.3(11)        | 10.8(12)        | 0.8(11)         |
| O5   | 24.1(15)        | 32.5(16)        | 19.3(14)        | -0.5(12)        | 4.9(12)         | 5.6(12)         |
| O4   | 35.8(17)        | 12.1(12)        | 17.1(14)        | -0.9(11)        | 0.1(12)         | 2.8(11)         |
| O1   | 26.8(15)        | 16.2(13)        | 17.6(13)        | -3.5(11)        | 7.7(11)         | -0.1(11)        |
| C1   | 24(2)           | 19.2(18)        | 15.1(18)        | 3.1(15)         | 7.9(16)         | 7.1(15)         |
| C6   | 25(2)           | 13.1(17)        | 22(2)           | -4.0(15)        | 7.9(16)         | 0.7(15)         |
| C5   | 28(2)           | 21.5(19)        | 18(2)           | 1.3(16)         | 3.0(16)         | 6.5(17)         |
| C7   | 20(2)           | 42(3)           | 23(2)           | 2.1(19)         | -2.0(17)        | -1.6(18)        |
| C2   | 28(2)           | 20.4(19)        | 21(2)           | -0.8(16)        | 6.0(17)         | 3.2(16)         |
| C3   | 30(2)           | 18.1(19)        | 23(2)           | 4.9(16)         | 7.2(18)         | 3.0(16)         |
| C4   | 30(2)           | 27(2)           | 16(2)           | 4.3(16)         | 9.2(18)         | 9.2(17)         |
| C8   | 32(2)           | 35(2)           | 28(2)           | 4.0(19)         | 10.7(19)        | -2.4(19)        |



Table 5: Bond Lengths for **8a**.

| Atom | Atom | Length/Å |
|------|------|----------|
| I1   | O2   | 2.268(3) |
| I1   | O5   | 1.990(3) |
| I1   | C1   | 2.093(4) |
| P1   | O2   | 1.515(3) |
| P1   | O3   | 1.486(3) |
| P1   | O4   | 1.542(3) |
| P1   | O1   | 1.617(3) |
| O5   | C7   | 1.449(5) |
| O1   | C6   | 1.390(5) |
| C1   | C6   | 1.390(6) |
| C1   | C2   | 1.385(5) |
| C6   | C5   | 1.391(6) |
| C5   | C4   | 1.378(6) |
| C2   | C3   | 1.388(5) |
| C3   | C4   | 1.401(6) |
| C3   | C8   | 1.503(6) |

Table 6: Bond Angles for **8a**.

| Atom | Atom | Atom | Angle/°    | Atom | Atom | Atom | Angle/°  |
|------|------|------|------------|------|------|------|----------|
| O5   | I1   | O2   | 172.66(10) | C6   | C1   | I1   | 119.3(3) |
| O5   | I1   | C1   | 89.99(13)  | C2   | C1   | I1   | 119.7(3) |
| C1   | I1   | O2   | 82.69(13)  | C2   | C1   | C6   | 121.0(3) |
| O2   | P1   | O4   | 110.20(15) | O1   | C6   | C5   | 119.2(4) |
| O2   | P1   | O1   | 106.87(15) | C1   | C6   | O1   | 121.5(3) |
| O3   | P1   | O2   | 116.06(16) | C1   | C6   | C5   | 119.2(4) |
| O3   | P1   | O4   | 111.80(17) | C4   | C5   | C6   | 119.6(4) |
| O3   | P1   | O1   | 105.11(15) | C1   | C2   | C3   | 120.3(4) |
| O4   | P1   | O1   | 106.07(15) | C2   | C3   | C4   | 118.3(4) |
| P1   | O2   | I1   | 120.84(14) | C2   | C3   | C8   | 121.0(4) |
| C7   | O5   | I1   | 113.6(2)   | C4   | C3   | C8   | 120.7(4) |
| C6   | O1   | P1   | 118.6(2)   | C5   | C4   | C3   | 121.7(4) |

Table 7: Torsion Angles for **8a**.

| A  | B  | C  | D  | Angle/°     | A  | B  | C  | D  | Angle/°   |
|----|----|----|----|-------------|----|----|----|----|-----------|
| I1 | C1 | C6 | O1 | 0.1(5)      | O1 | C6 | C5 | C4 | 177.9(3)  |
| I1 | C1 | C6 | C5 | 177.7(3)    | C1 | C6 | C5 | C4 | 0.2(6)    |
| I1 | C1 | C2 | C3 | -177.5(3)   | C1 | C2 | C3 | C4 | -0.6(6)   |
| P1 | O1 | C6 | C1 | -65.1(4)    | C1 | C2 | C3 | C8 | 178.8(4)  |
| P1 | O1 | C6 | C5 | 117.3(3)    | C6 | C1 | C2 | C3 | 2.1(6)    |
| O2 | P1 | O1 | C6 | 51.0(3)     | C6 | C5 | C4 | C3 | 1.2(6)    |
| O3 | P1 | O2 | I1 | -101.90(19) | C2 | C1 | C6 | O1 | -179.5(3) |
| O3 | P1 | O1 | C6 | 174.8(3)    | C2 | C1 | C6 | C5 | -1.8(6)   |
| O4 | P1 | O2 | I1 | 129.76(17)  | C2 | C3 | C4 | C5 | -1.0(6)   |
| O4 | P1 | O1 | C6 | -66.6(3)    | C8 | C3 | C4 | C5 | 179.5(4)  |
| O1 | P1 | O2 | I1 | 14.9(2)     |    |    |    |    |           |

Table 8: Hydrogen Atom Coordinates ( $\text{\AA} \times 10^4$ ) and Isotropic Displacement Parameters ( $\text{\AA}^2 \times 10^3$ ) for **8a**.

| Atom | <i>x</i> | <i>y</i> | <i>z</i> | U(eq) |
|------|----------|----------|----------|-------|
| H4   | 8224.11  | 1651.65  | 6415.71  | 33    |
| H5   | 7086.57  | 5234.13  | 7457.63  | 27    |
| H7A  | 5666..04 | 4470.55  | 4113.78  | 43    |
| H7B  | 5068..54 | 4517.84  | 4404.66  | 43    |
| H7C  | 5573..2  | 2034.43  | 4607.74  | 43    |
| H2   | 5800.65  | 1539.73  | 5773.22  | 27    |
| H4A  | 6265..67 | 2305.42  | 7572.22  | 29    |
| H8A  | 5050..94 | 810.51   | 6664.79  | 47    |
| H8B  | 5472     | -985.25  | 7186.83  | 47    |
| H8C  | 5408..21 | -2095.16 | 6507.35  | 47    |

## 7.2 Crystallographic Data from Compound **9a**

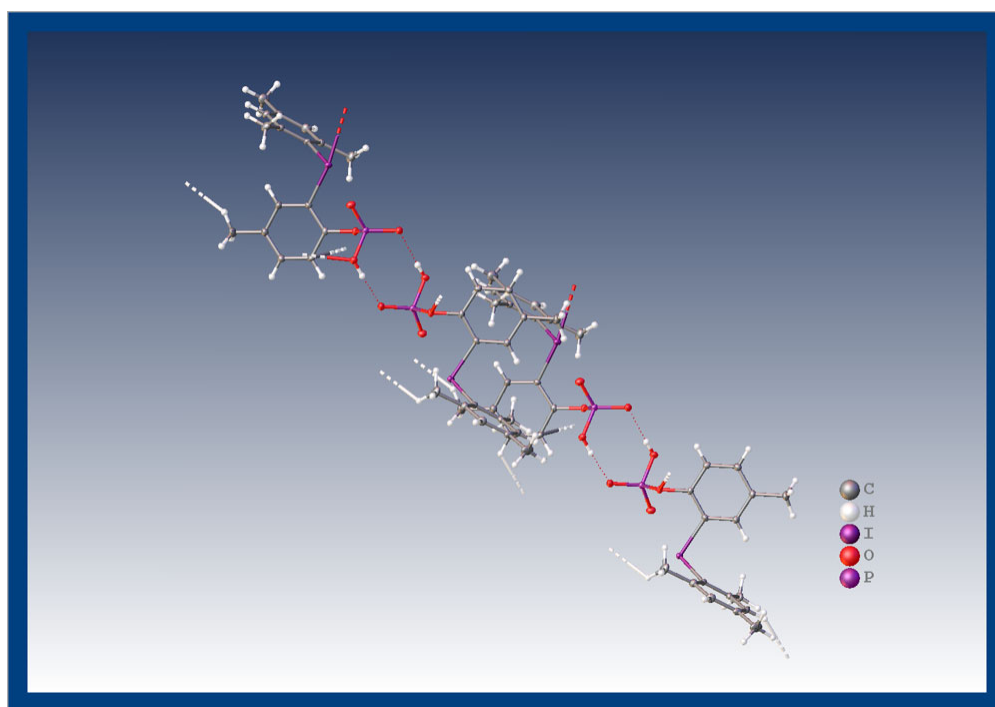

Figure 58: Crystal data and structure refinement for **9a**.

Table 9: Crystal data and structure refinement for **9a**.

|                   |                                                        |
|-------------------|--------------------------------------------------------|
| Empirical formula | $\text{C}_{16}\text{H}_{18}\text{I}\text{O}_4\text{P}$ |
| Formula weight    | 432.17                                                 |
| Temperature/K     | 100.00                                                 |
| Crystal system    | triclinic                                              |
| Space group       | P-1                                                    |
| <i>a</i> /Å       | 10.5418(5)                                             |
| <i>b</i> /Å       | 12.7822(5)                                             |

|                                                |                                                               |
|------------------------------------------------|---------------------------------------------------------------|
| c/Å                                            | 13.0647(6)                                                    |
| $\alpha/^\circ$                                | 97.395(2)                                                     |
| $\beta/^\circ$                                 | 95.008(2)                                                     |
| $\gamma/^\circ$                                | 107.951(2)                                                    |
| Volume/Å <sup>3</sup>                          | 1645.70(13)                                                   |
| Z                                              | 4                                                             |
| $\rho_{\text{calc}}/\text{cm}^3$               | 1.744                                                         |
| $\mu/\text{mm}^{-1}$                           | 2.058                                                         |
| F(000)                                         | 856.0                                                         |
| Crystal size/mm <sup>3</sup>                   | 0.242 × 0.172 × 0.107                                         |
| Radiation                                      | MoK $\alpha$ ( $\lambda = 0.71073$ )                          |
| 2 $\theta$ range for data collection/ $^\circ$ | 4.396 to 56.648                                               |
| Index ranges                                   | -14 ≤ h ≤ 14, -17 ≤ k ≤ 17, -17 ≤ l ≤ 17                      |
| Reflections collected                          | 48708                                                         |
| Independent reflections                        | 8194 [R <sub>int</sub> = 0.0374, R <sub>sigma</sub> = 0.0246] |
| Data/restraints/parameters                     | 8194/0/413                                                    |
| Goodness-of-fit on F <sup>2</sup>              | 1.046                                                         |
| Final R indexes [ $ \geq 2\sigma(I)$ ]         | R <sub>1</sub> = 0.0198, wR <sub>2</sub> = 0.0477             |
| Final R indexes [all data]                     | R <sub>1</sub> = 0.0215, wR <sub>2</sub> = 0.0486             |
| Largest diff. peak/hole / e Å <sup>-3</sup>    | 1.81/-0.79                                                    |

Table 10: Fractional Atomic Coordinates ( $\times 10^4$ ) and Equivalent Isotropic Displacement Parameters ( $\text{Å}^2 \times 10^3$ ) for **9a**.

| Atom | x          | y          | z           | U(eq)    |
|------|------------|------------|-------------|----------|
| I1   | 3770.3(2)  | 407.0(2)   | 10812.8(2)  | 10.96(3) |
| I2   | 6101.8(2)  | 4448.1(2)  | 13808.2(2)  | 11.19(3) |
| P2   | 4605.6(5)  | 2978.3(4)  | 15808.3(4)  | 11.40(9) |
| P1   | 4905.9(5)  | 1908.3(4)  | 8643.3(4)   | 11.55(9) |
| O7   | 4065.8(13) | 3217.9(11) | 14805.8(10) | 16.0(3)  |
| O6   | 4024.2(13) | 1706.0(10) | 15850.4(11) | 14.3(3)  |
| O4   | 5720.8(13) | 1648.7(11) | 9510.3(11)  | 16.5(3)  |
| O5   | 6228.3(12) | 3212.9(10) | 15796.4(10) | 11.9(2)  |
| O8   | 4557.8(13) | 3689.9(11) | 16804.9(10) | 15.2(3)  |
| O2   | 5453.1(14) | 3186.1(11) | 8580.2(11)  | 14.3(3)  |
| O1   | 3403.2(12) | 1731.6(10) | 8986.5(10)  | 11.9(2)  |
| O3   | 4627.9(14) | 1189.6(11) | 7600.8(10)  | 17.2(3)  |
| C7   | 2242.4(17) | -268.9(14) | 11710.3(13) | 10.7(3)  |
| C1   | 3269.4(17) | 1887.1(14) | 10830.0(14) | 11.5(3)  |
| C6   | 2978.5(18) | 2416.4(15) | 11736.8(14) | 13.2(3)  |
| C23  | 7803.8(17) | 5160.5(14) | 13081.9(14) | 11.3(3)  |
| C21  | 7646.8(19) | 1653.2(15) | 13338.3(15) | 16.1(4)  |
| C5   | 2691.2(17) | 3405.4(15) | 11735.4(14) | 12.8(3)  |
| C12  | 2540.3(18) | -1.4(14)   | 12791.8(14) | 12.2(3)  |
| C22  | 7276.4(19) | 2588.2(15) | 13228.5(14) | 14.6(3)  |
| C4   | 2723.7(18) | 3853.1(15) | 10813.8(15) | 14.8(3)  |
| C17  | 6761.9(17) | 3085.7(14) | 14032.9(14) | 11.4(3)  |
| C28  | 7694.4(18) | 4932.4(14) | 11996.3(14) | 12.8(3)  |
| C19  | 6974.6(18) | 1727.3(15) | 15067.7(14) | 13.6(3)  |
| C20  | 7465.6(19) | 1218.5(15) | 14261.3(15) | 15.9(4)  |
| C11  | 1460.8(19) | -347.3(16) | 13350.0(14) | 15.4(3)  |
| C27  | 8865.9(19) | 5360.4(15) | 11556.1(15) | 15.2(3)  |
| C3   | 2991.0(18) | 3312.9(15) | 9909.8(14)  | 13.5(3)  |
| C8   | 966.1(18)  | -892.5(15) | 11182.7(14) | 14.1(3)  |

| Atom | x           | y           | z           | U(eq)   |
|------|-------------|-------------|-------------|---------|
| C18  | 6633.5(17)  | 2675.7(14)  | 14963.9(14) | 11.2(3) |
| C14  | 675(2)      | -1219.0(19) | 10014.1(16) | 23.5(4) |
| C24  | 9004.0(18)  | 5786.3(15)  | 13723.1(14) | 13.8(3) |
| C2   | 3255.5(17)  | 2315.1(14)  | 9908.6(13)  | 10.7(3) |
| C13  | 2350(2)     | 3978.1(17)  | 12708.1(15) | 19.1(4) |
| C29  | 8221(3)     | 1121.2(18)  | 12479.1(17) | 27.2(5) |
| C32  | 6395.3(19)  | 4272.2(17)  | 11306.1(15) | 19.3(4) |
| C10  | 167.7(19)   | -964.3(16)  | 12872.8(16) | 16.8(4) |
| C9   | -52.6(18)   | -1235.4(16) | 11790.3(16) | 17.3(4) |
| C16  | 3929.9(19)  | 602.5(16)   | 13362.0(15) | 16.4(4) |
| C26  | 10085.5(18) | 5990.9(15)  | 12154.6(15) | 14.9(3) |
| C30  | 9095(2)     | 6048.7(18)  | 14892.1(16) | 22.2(4) |
| C25  | 10130.4(18) | 6190.2(16)  | 13232.2(15) | 16.5(4) |
| C31  | 11332(2)    | 6459.3(18)  | 11663.7(18) | 23.2(4) |
| C15  | -972(2)     | -1347.0(19) | 13496.9(19) | 27.0(5) |

Table 11: Anisotropic Displacement Parameters ( $\text{\AA}^2 \times 10^3$ ) for **9a**.

| Atom | U <sub>11</sub> | U <sub>22</sub> | U <sub>33</sub> | U <sub>23</sub> | U <sub>13</sub> | U <sub>12</sub> |
|------|-----------------|-----------------|-----------------|-----------------|-----------------|-----------------|
| I1   | 12.06(5)        | 10.22(5)        | 12.68(6)        | 4.19(4)         | 5.51(4)         | 4.63(4)         |
| I2   | 11.88(5)        | 10.20(5)        | 13.20(6)        | 4.74(4)         | 4.45(4)         | 4.15(4)         |
| P2   | 12.5(2)         | 10.9(2)         | 11.9(2)         | 3.53(16)        | 4.52(16)        | 3.96(16)        |
| P1   | 13.6(2)         | 11.0(2)         | 11.5(2)         | 3.30(16)        | 4.42(16)        | 4.80(16)        |
| O7   | 15.5(6)         | 18.1(6)         | 16.3(7)         | 6.7(5)          | 2.8(5)          | 6.2(5)          |
| O6   | 17.9(6)         | 11.4(6)         | 13.0(6)         | 3.1(5)          | 4.4(5)          | 2.8(5)          |
| O4   | 17.0(6)         | 16.7(6)         | 17.9(7)         | 6.2(5)          | 2.7(5)          | 7.0(5)          |
| O5   | 12.7(6)         | 12.8(6)         | 10.0(6)         | 0.7(5)          | 2.6(5)          | 4.0(5)          |
| O8   | 21.0(7)         | 13.8(6)         | 13.9(6)         | 3.8(5)          | 6.8(5)          | 8.3(5)          |
| O2   | 16.8(6)         | 11.3(6)         | 15.3(7)         | 4.9(5)          | 4.9(5)          | 3.4(5)          |
| O1   | 11.7(6)         | 12.6(6)         | 10.3(6)         | 0.1(5)          | 2.1(5)          | 2.9(5)          |
| O3   | 26.8(7)         | 13.2(6)         | 13.9(6)         | 2.7(5)          | 7.9(5)          | 8.0(5)          |
| C7   | 11.2(7)         | 10.5(7)         | 11.4(8)         | 3.7(6)          | 4.9(6)          | 3.2(6)          |
| C1   | 11.0(7)         | 9.1(7)          | 14.2(8)         | 1.8(6)          | 2.3(6)          | 3.0(6)          |
| C6   | 13.9(8)         | 13.7(8)         | 12.1(8)         | 2.3(6)          | 2.6(6)          | 4.5(6)          |
| C23  | 11.3(8)         | 10.0(7)         | 13.3(8)         | 4.9(6)          | 4.2(6)          | 2.6(6)          |
| C21  | 19.7(9)         | 13.2(8)         | 15.8(9)         | 0.9(7)          | 4.9(7)          | 5.6(7)          |
| C5   | 12.9(8)         | 13.4(8)         | 11.8(8)         | 0.8(6)          | 1.1(6)          | 4.5(6)          |
| C12  | 14.7(8)         | 12.0(8)         | 11.3(8)         | 1.9(6)          | 1.0(6)          | 6.5(6)          |
| C22  | 19.5(9)         | 12.7(8)         | 12.5(8)         | 3.2(6)          | 5.3(7)          | 5.2(7)          |
| C4   | 16.9(8)         | 12.8(8)         | 15.4(9)         | 2.4(7)          | 0.7(7)          | 6.1(7)          |
| C17  | 12.6(8)         | 8.5(7)          | 13.5(8)         | 2.7(6)          | 2.3(6)          | 3.4(6)          |
| C28  | 13.6(8)         | 11.9(8)         | 13.0(8)         | 3.8(6)          | 1.4(6)          | 3.5(6)          |
| C19  | 15.8(8)         | 13.9(8)         | 10.7(8)         | 3.3(6)          | 0.8(6)          | 4.3(7)          |
| C20  | 19.8(9)         | 13.2(8)         | 16.4(9)         | 2.9(7)          | 1.8(7)          | 7.7(7)          |
| C11  | 20.9(9)         | 19.9(9)         | 10.7(8)         | 6.1(7)          | 5.3(7)          | 11.8(7)         |
| C27  | 17.3(8)         | 16.6(8)         | 12.9(8)         | 5.0(7)          | 3.0(7)          | 6.0(7)          |
| C3   | 14.0(8)         | 14.0(8)         | 13.3(8)         | 4.3(6)          | 1.0(6)          | 4.9(7)          |
| C8   | 13.1(8)         | 16.0(8)         | 12.9(8)         | 2.9(7)          | 0.6(7)          | 4.2(7)          |
| C18  | 9.1(7)          | 11.7(8)         | 11.3(8)         | -0.1(6)         | 1.6(6)          | 1.8(6)          |
| C14  | 20.0(9)         | 30.6(11)        | 13.4(9)         | 0.0(8)          | -1.6(7)         | 1.3(8)          |
| C24  | 14.8(8)         | 11.9(8)         | 14.4(9)         | 1.5(6)          | 1.9(7)          | 4.2(7)          |
| C2   | 9.2(7)          | 11.6(8)         | 10.1(8)         | 0.0(6)          | 2.1(6)          | 2.2(6)          |

| Atom | U <sub>11</sub> | U <sub>22</sub> | U <sub>33</sub> | U <sub>23</sub> | U <sub>13</sub> | U <sub>12</sub> |
|------|-----------------|-----------------|-----------------|-----------------|-----------------|-----------------|
| C13  | 25.4(10)        | 20.0(9)         | 15.1(9)         | 0.4(7)          | 5.1(7)          | 12.5(8)         |
| C29  | 44.4(13)        | 21.2(10)        | 24.1(11)        | 5.2(8)          | 17.9(10)        | 17.9(10)        |
| C32  | 17.0(9)         | 22.3(9)         | 14.0(9)         | 4.8(7)          | -1.7(7)         | -0.1(7)         |
| C10  | 16.0(8)         | 19.5(9)         | 20.9(10)        | 10.1(7)         | 9.4(7)          | 9.7(7)          |
| C9   | 10.9(8)         | 18.6(9)         | 21.0(10)        | 4.6(7)          | 1.9(7)          | 2.3(7)          |
| C16  | 16.8(9)         | 17.6(9)         | 13.0(8)         | -0.6(7)         | -2.4(7)         | 5.3(7)          |
| C26  | 12.6(8)         | 15.2(8)         | 19.8(9)         | 7.1(7)          | 5.9(7)          | 5.9(7)          |
| C30  | 22.1(10)        | 24.4(10)        | 14.6(9)         | -1.0(7)         | 0.2(7)          | 2.1(8)          |
| C25  | 10.6(8)         | 16.4(8)         | 19.8(9)         | 1.6(7)          | 0.0(7)          | 1.5(7)          |
| C31  | 16.8(9)         | 24.4(10)        | 31.6(12)        | 8.9(8)          | 11.5(8)         | 7.4(8)          |
| C15  | 23.7(10)        | 32.3(11)        | 34.1(12)        | 17.2(9)         | 19.7(9)         | 13.1(9)         |

Table 12: Bond Lengths for **9a**.

| Atom | Atom | Length/Å   | Atom | Atom | Length/Å |
|------|------|------------|------|------|----------|
| I1   | C7   | 2.1091(17) | C21  | C29  | 1.505(3) |
| I1   | C1   | 2.1133(17) | C5   | C4   | 1.397(3) |
| I2   | C23  | 2.1121(17) | C5   | C13  | 1.511(2) |
| I2   | C17  | 2.1086(17) | C12  | C11  | 1.393(2) |
| P2   | O7   | 1.4878(14) | C12  | C16  | 1.504(2) |
| P2   | O6   | 1.5614(13) | C22  | C17  | 1.394(2) |
| P2   | O5   | 1.6450(13) | C4   | C3   | 1.385(3) |
| P2   | O8   | 1.5033(13) | C17  | C18  | 1.386(2) |
| P1   | O4   | 1.4946(14) | C28  | C27  | 1.394(2) |
| P1   | O2   | 1.5715(13) | C28  | C32  | 1.509(2) |
| P1   | O1   | 1.6404(13) | C19  | C20  | 1.388(3) |
| P1   | O3   | 1.4923(14) | C19  | C18  | 1.385(2) |
| O5   | C18  | 1.381(2)   | C11  | C10  | 1.390(3) |
| O1   | C2   | 1.380(2)   | C27  | C26  | 1.392(3) |
| C7   | C12  | 1.394(2)   | C3   | C2   | 1.387(2) |
| C7   | C8   | 1.399(2)   | C8   | C14  | 1.508(3) |
| C1   | C6   | 1.393(2)   | C8   | C9   | 1.387(3) |
| C1   | C2   | 1.386(2)   | C24  | C30  | 1.509(3) |
| C6   | C5   | 1.388(2)   | C24  | C25  | 1.389(3) |
| C23  | C28  | 1.398(2)   | C10  | C9   | 1.393(3) |
| C23  | C24  | 1.400(2)   | C10  | C15  | 1.503(3) |
| C21  | C22  | 1.387(3)   | C26  | C25  | 1.392(3) |
| C21  | C20  | 1.395(3)   | C26  | C31  | 1.503(3) |

Table 13: Bond Angles for **9a**.

| Atom | Atom | Atom | Angle/°   | Atom | Atom | Atom | Angle/°    |
|------|------|------|-----------|------|------|------|------------|
| C7   | I1   | C1   | 92.37(7)  | C11  | C12  | C16  | 119.90(16) |
| C17  | I2   | C23  | 91.07(7)  | C21  | C22  | C17  | 120.34(17) |
| O7   | P2   | O6   | 109.94(8) | C3   | C4   | C5   | 121.37(17) |
| O7   | P2   | O5   | 107.21(7) | C22  | C17  | I2   | 119.39(13) |
| O7   | P2   | O8   | 118.66(8) | C18  | C17  | I2   | 119.46(13) |
| O6   | P2   | O5   | 104.37(7) | C18  | C17  | C22  | 121.11(16) |
| O8   | P2   | O6   | 112.39(8) | C23  | C28  | C32  | 123.47(16) |
| O8   | P2   | O5   | 102.89(7) | C27  | C28  | C23  | 116.50(16) |

| Atom | Atom | Atom | Angle/°    | Atom | Atom | Atom | Angle/°    |
|------|------|------|------------|------|------|------|------------|
| O4   | P1   | O2   | 110.06(8)  | C27  | C28  | C32  | 120.03(16) |
| O4   | P1   | O1   | 106.71(7)  | C18  | C19  | C20  | 120.32(17) |
| O2   | P1   | O1   | 103.75(7)  | C19  | C20  | C21  | 121.22(17) |
| O3   | P1   | O4   | 118.66(8)  | C10  | C11  | C12  | 122.72(17) |
| O3   | P1   | O2   | 112.66(8)  | C26  | C27  | C28  | 122.42(17) |
| O3   | P1   | O1   | 103.50(7)  | C4   | C3   | C2   | 120.19(17) |
| C18  | O5   | P2   | 118.04(11) | C7   | C8   | C14  | 123.29(16) |
| C2   | O1   | P1   | 120.13(11) | C9   | C8   | C7   | 116.73(17) |
| C12  | C7   | I1   | 118.01(12) | C9   | C8   | C14  | 119.96(17) |
| C12  | C7   | C8   | 123.98(16) | O5   | C18  | C17  | 121.65(16) |
| C8   | C7   | I1   | 117.85(13) | O5   | C18  | C19  | 119.63(16) |
| C6   | C1   | I1   | 121.14(13) | C19  | C18  | C17  | 118.67(16) |
| C2   | C1   | I1   | 117.44(12) | C23  | C24  | C30  | 122.84(17) |
| C2   | C1   | C6   | 121.42(16) | C25  | C24  | C23  | 116.86(17) |
| C5   | C6   | C1   | 120.02(17) | C25  | C24  | C30  | 120.28(17) |
| C28  | C23  | I2   | 118.53(13) | O1   | C2   | C1   | 121.33(15) |
| C28  | C23  | C24  | 123.57(16) | O1   | C2   | C3   | 119.87(16) |
| C24  | C23  | I2   | 117.80(13) | C1   | C2   | C3   | 118.63(16) |
| C22  | C21  | C20  | 118.26(17) | C11  | C10  | C9   | 118.28(17) |
| C22  | C21  | C29  | 120.63(18) | C11  | C10  | C15  | 121.56(19) |
| C20  | C21  | C29  | 121.11(17) | C9   | C10  | C15  | 120.16(18) |
| C6   | C5   | C4   | 118.31(16) | C8   | C9   | C10  | 122.15(17) |
| C6   | C5   | C13  | 120.59(17) | C27  | C26  | C25  | 118.39(17) |
| C4   | C5   | C13  | 121.10(16) | C27  | C26  | C31  | 121.59(18) |
| C7   | C12  | C16  | 124.03(16) | C25  | C26  | C31  | 120.02(17) |
| C11  | C12  | C7   | 116.06(16) | C24  | C25  | C26  | 122.26(17) |

Table 14: Torsion Angles for **9a**.

| Atom | Atom | Atom | Atom | Angle/°     | Atom | Atom | Atom | Atom | Angle/°     |
|------|------|------|------|-------------|------|------|------|------|-------------|
| I1   | C7   | C12  | C11  | 172.19(13)  | C5   | C4   | C3   | C2   | -1.1(3)     |
| I1   | C7   | C12  | C16  | -9.0(2)     | C12  | C7   | C8   | C14  | -177.11(18) |
| I1   | C7   | C8   | C14  | 7.6(2)      | C12  | C7   | C8   | C9   | 1.4(3)      |
| I1   | C7   | C8   | C9   | -173.88(13) | C12  | C11  | C10  | C9   | -0.6(3)     |
| I1   | C1   | C6   | C5   | 178.09(13)  | C12  | C11  | C10  | C15  | 178.69(18)  |
| I1   | C1   | C2   | O1   | 7.6(2)      | C22  | C21  | C20  | C19  | -2.3(3)     |
| I1   | C1   | C2   | C3   | -177.07(13) | C22  | C17  | C18  | O5   | 174.69(16)  |
| I2   | C23  | C28  | C27  | -175.96(13) | C22  | C17  | C18  | C19  | -2.7(3)     |
| I2   | C23  | C28  | C32  | 4.7(2)      | C4   | C3   | C2   | O1   | 174.28(16)  |
| I2   | C23  | C24  | C30  | -5.3(2)     | C4   | C3   | C2   | C1   | -1.1(3)     |
| I2   | C23  | C24  | C25  | 176.21(13)  | C28  | C23  | C24  | C30  | 178.41(18)  |
| I2   | C17  | C18  | O5   | -7.6(2)     | C28  | C23  | C24  | C25  | -0.1(3)     |
| I2   | C17  | C18  | C19  | 175.03(13)  | C28  | C27  | C26  | C25  | 0.5(3)      |
| P2   | O5   | C18  | C17  | 82.82(18)   | C28  | C27  | C26  | C31  | -179.06(17) |
| P2   | O5   | C18  | C19  | -99.82(17)  | C20  | C21  | C22  | C17  | 1.2(3)      |
| P1   | O1   | C2   | C1   | -90.46(18)  | C20  | C19  | C18  | O5   | -175.88(16) |
| P1   | O1   | C2   | C3   | 94.25(17)   | C20  | C19  | C18  | C17  | 1.6(3)      |
| O7   | P2   | O5   | C18  | -54.00(14)  | C11  | C10  | C9   | C8   | -1.2(3)     |
| O6   | P2   | O5   | C18  | 62.61(14)   | C27  | C26  | C25  | C24  | -0.3(3)     |
| O4   | P1   | O1   | C2   | 56.81(14)   | C8   | C7   | C12  | C11  | -3.1(3)     |
| O8   | P2   | O5   | C18  | -179.87(12) | C8   | C7   | C12  | C16  | 175.73(17)  |
| O2   | P1   | O1   | C2   | -59.44(14)  | C18  | C19  | C20  | C21  | 1.0(3)      |

| Atom | Atom | Atom | Atom | Angle/°     | Atom | Atom | Atom | Atom | Angle/°     |
|------|------|------|------|-------------|------|------|------|------|-------------|
| O3   | P1   | O1   | C2   | -177.25(13) | C14  | C8   | C9   | C10  | 179.41(18)  |
| C7   | C12  | C11  | C10  | 2.7(3)      | C24  | C23  | C28  | C27  | 0.3(3)      |
| C7   | C8   | C9   | C10  | 0.9(3)      | C24  | C23  | C28  | C32  | -179.06(17) |
| C1   | C6   | C5   | C4   | -1.0(3)     | C2   | C1   | C6   | C5   | -1.2(3)     |
| C1   | C6   | C5   | C13  | 178.93(17)  | C13  | C5   | C4   | C3   | -177.79(17) |
| C6   | C1   | C2   | O1   | -173.07(15) | C29  | C21  | C22  | C17  | -179.14(19) |
| C6   | C1   | C2   | C3   | 2.3(3)      | C29  | C21  | C20  | C19  | 178.01(19)  |
| C6   | C5   | C4   | C3   | 2.1(3)      | C32  | C28  | C27  | C26  | 178.87(17)  |
| C23  | C28  | C27  | C26  | -0.5(3)     | C16  | C12  | C11  | C10  | -176.19(17) |
| C23  | C24  | C25  | C26  | 0.1(3)      | C30  | C24  | C25  | C26  | -178.48(18) |
| C21  | C22  | C17  | I2   | -176.42(14) | C31  | C26  | C25  | C24  | 179.31(18)  |
| C21  | C22  | C17  | C18  | 1.3(3)      | C15  | C10  | C9   | C8   | 179.44(18)  |

Table 15: Hydrogen Atom Coordinates ( $\text{\AA} \times 10^4$ ) and Isotropic Displacement Parameters ( $\text{\AA}^2 \times 10^3$ ) for **9a**.

| Atom | x        | y        | z         | U(eq)  |
|------|----------|----------|-----------|--------|
| H6   | 2976.68  | 2100.3   | 12356.36  | 16     |
| H22  | 7373.84  | 2891.12  | 12601.86  | 18     |
| H4   | 2559.15  | 4542.36  | 10806.72  | 18     |
| H19  | 6872.02  | 1423.79  | 15693.72  | 16     |
| H20  | 7682.26  | 562.18   | 14339.39  | 19     |
| H11  | 1614.86  | -153.43  | 14087.49  | 18     |
| H27  | 8830.49  | 5216.35  | 10820.68  | 18     |
| H3   | 2992.98  | 3626.8   | 9288.99   | 16     |
| H14A | 858.22   | -545.99  | 9691.29   | 35     |
| H14B | -271.7   | -1674.44 | 9815.88   | 35     |
| H14C | 1250.41  | -1648.69 | 9775.74   | 35     |
| H13A | 1390.67  | 3898.55  | 12618.44  | 29     |
| H13B | 2884.11  | 4771     | 12832.76  | 29     |
| H13C | 2555.11  | 3636.07  | 13304.08  | 29     |
| H29A | 8188.52  | 1492.04  | 11870.4   | 41     |
| H29B | 7691.58  | 329.44   | 12288.91  | 41     |
| H29C | 9156.71  | 1195.8   | 12718.32  | 41     |
| H32A | 6057.68  | 3527.06  | 11493.86  | 29     |
| H32B | 6556.31  | 4205.74  | 10576.71  | 29     |
| H32C | 5728.33  | 4654.97  | 11399.55  | 29     |
| H9   | -929.22  | -1669.35 | 11457.5   | 21     |
| H16A | 4533.68  | 181      | 13173.82  | 25     |
| H16B | 3898.54  | 674.44   | 14114.56  | 25     |
| H16C | 4263.24  | 1345.67  | 13169.38  | 25     |
| H30A | 8462.24  | 6444.18  | 15070.61  | 33     |
| H30B | 10012.9  | 6518.89  | 15184.12  | 33     |
| H30C | 8870.67  | 5353.37  | 15180.84  | 33     |
| H25  | 10960.1  | 6617.29  | 13645.95  | 20     |
| H31A | 12020.45 | 6142.48  | 11900.41  | 35     |
| H31B | 11671.94 | 7271.76  | 11866.51  | 35     |
| H31C | 11116.84 | 6269     | 10903.93  | 35     |
| H15A | -622.24  | -1173.63 | 14240.32  | 41     |
| H15B | -1410.04 | -2153.5  | 13296.63  | 41     |
| H15C | -1628.27 | -963.23  | 13360.43  | 41     |
| H6A  | 4240(30) | 1520(20) | 16420(20) | 43(9)  |
| H2   | 5150(30) | 3300(30) | 8070(30)  | 56(11) |
